# Supplementary material for: The two‐component system CroRS acts as a master regulator of cell envelope homeostasis to confer antimicrobial tolerance in the bacterial pathogen Enterococcus faecalis
Source: PubMed Central journal article supplement (PMC10952268; doi:10.1111/mmi.15128), 2023-07-20
Supplement: MMI-120-408-s001.pdf [file MMI-120-408-s001.pdf]

## Supplementary Tables

| <b>Contents:</b>                                                                                                                                                                                   | <b>Page No.</b> |
|----------------------------------------------------------------------------------------------------------------------------------------------------------------------------------------------------|-----------------|
| <b>Table S1. Genes differentially expressed in <i>E. faecalis</i> wild-type versus <math>\Delta croRS</math> in the absence of TXB.</b>                                                            | 2 - 25          |
| <b>Table S2. Genes differentially expressed in <i>E. faecalis</i> wild-type versus <math>\Delta croRS</math> in the presence of TXB.</b>                                                           | 26 - 44         |
| <b>Table S3. Genes differentially expressed in <i>E. faecalis</i> wild-type in the presence versus absence of TXB.</b>                                                                             | 45 - 75         |
| <b>Table S4. Genes differentially expressed in <i>E. faecalis</i> <math>\Delta croRS</math> in the presence versus absence of TXB.</b>                                                             | 76 - 92         |
| <b>Table S5. The TXB-induced CroRS regulon in <i>E. faecalis</i> wild-type.<sup>†</sup></b>                                                                                                        | 93 - 98         |
| <b>Table S6. A comparison of RNAseq and qRT-PCR differential gene expression in the <i>E. faecalis</i> WT and <math>\Delta croRS</math> strains in the presence and absence of TXB.</b>            | 99              |
| <b>Table S7. Bacterial strains, plasmids and primers used in this study.</b>                                                                                                                       | 100 - 102       |
| <b>Figure S1. Optimisation of teixobactin concentration for RNA sequencing.</b>                                                                                                                    | 103             |
| <b>Figure S2. Determining the TXB-induced CroRS regulon.</b>                                                                                                                                       | 104             |
| <b>Figure S3. Differential gene expression in the <i>E. faecalis</i> WT and <math>\Delta croRS</math> in the presence and absence of teixobactin.</b>                                              | 105             |
| <b>Figure S4. Growth curve of the evolved <math>\Delta croRS</math> mutants 1BS – 5BS alongside the isogenic <math>\Delta croRS</math> mutant and WT (JH2-2).</b>                                  | 106             |
| <b>Figure S5. A 3D model and amino acid sequence comparison of the putative heptaprenyl diphosphate synthase identifying mutations in the gain of tolerance <math>\Delta croRS</math> mutants.</b> | 107             |
| <b>Figure S6. Growth curve of the <i>E. faecalis</i> wild-type, <math>\Delta croRS</math>, 4BS and <math>\Delta croRS_{\Delta hppS}</math> strains.</b>                                            | 108             |

Table S1. Genes differentially expressed in *E. faecalis* wild-type versus  $\Delta$ *croRS* in the absence of TXB.

| JH2-2 Locus Tag                     | V583 Gene | Gene Name     | F/C (log <sub>2</sub> ) | Gene Function                                               | P <sub>adj</sub> |
|-------------------------------------|-----------|---------------|-------------------------|-------------------------------------------------------------|------------------|
| <b><u>Amino acid metabolism</u></b> |           |               |                         |                                                             |                  |
| O994_RS13680                        | EF0097    | <i>pfoR</i>   | 3.0                     | regulatory protein                                          | 2.40E-29         |
| O994_RS13675                        | EF0098    | <i>sdhB-1</i> | 2.8                     | L-serine dehydratase, iron-sulfur-dependent subunit $\beta$ | 5.20E-21         |
| O994_RS13670                        | EF0099    | <i>sdhA-1</i> | 2.6                     | iron-sulfur-dependent L-serine dehydratase subunit $\alpha$ | 2.20E-16         |
| O994_RS13645                        | EF0104    | <i>arcA</i>   | 9.3                     | arginine deiminase                                          | 4.60E-193        |
| O994_RS13640                        | EF0105    | <i>argF-1</i> | 9.0                     | ornithine carbamoyltransferase                              | 1.20E-152        |
| O994_RS13600                        | EF0115    |               | 2.0                     | endoribonuclease L-PSP                                      | 2.10E-04         |
| O994_RS02700                        | EF0784    | <i>metK</i>   | 1.4                     | S-adenosylmethionine synthetase                             | 8.80E-02         |
| O994_RS06735                        | EF1584    | <i>cysK</i>   | 1.9                     | cysteine synthase A                                         | 4.00E-06         |
| O994_RS09975                        | EF2421    | <i>thrC</i>   | 1.8                     | threonine synthase                                          | 3.40E-03         |
| O994_RS09980                        | EF2422    | <i>hom</i>    | 1.7                     | homoserine dehydrogenase                                    | 2.40E-02         |
| O994_RS09990                        | EF2424    |               | 1.6                     | pyrroline-5-carboxylate reductase                           | 1.30E-02         |
| O994_RS10505                        | EF2568    |               | 2.8                     | class V aminotransferase                                    | 1.10E-09         |
| O994_RS01470                        | EF2983    |               | 1.8                     | glutamyl-tRNA amidotransferase subunit A                    | 2.00E-03         |
| O994_RS00525                        | EF3178    | <i>dapE</i>   | 2.5                     | succinyl-diaminopimelate desuccinylase                      | 8.60E-13         |
| O994_RS14060                        | EF0014    | <i>purA</i>   | -4.2                    | adenylosuccinate synthetase                                 | 8.90E-47         |
| O994_RS13940                        | EF0038    | <i>proB</i>   | -2.9                    | $\gamma$ -glutamyl kinase                                   | 2.20E-06         |
| O994_RS12655                        | EF0368    |               | -2.0                    | aspartate kinase                                            | 3.30E-03         |
| O994_RS01925                        | EF0634    |               | -4.3                    | tyrosine decarboxylase                                      | 1.10E-48         |
| O994_RS02475                        | EF0737    |               | -1.8                    | amidase                                                     | 5.50E-03         |
| O994_RS06620                        | EF1561    | <i>aroE</i>   | -2.0                    | shikimate 5-dehydrogenase                                   | 8.40E-06         |
| O994_RS07365                        | EF1719    | <i>pyrB</i>   | -1.7                    | aspartate carbamoyltransferase catalytic subunit            | 7.30E-02         |
| O994_RS07420                        | EF1731    | <i>aroD</i>   | -2.3                    | 3-dehydroquinase                                            | 7.80E-09         |
| O994_RS09560                        | EF2361    | <i>purB</i>   | -1.8                    | adenylosuccinate lyase                                      | 1.10E-04         |
| <b><u>Autolysis</u></b>             |           |               |                         |                                                             |                  |
| O994_RS05530                        | EF1348    |               | 1.7                     | glucan 1,6- $\alpha$ -glucosidase                           | 1.30E-03         |
| O994_RS11610                        | EF2863    |               | 2.3                     | endo- $\beta$ -N-acetylglucosaminidase                      | 1.70E-09         |

|                                       |        |               |      |                                                                     |          |
|---------------------------------------|--------|---------------|------|---------------------------------------------------------------------|----------|
| O994_RS06730                          | EF1583 |               | -1.6 | <i>N</i> -acetylmuramoyl-L-alanine amidase                          | 2.40E-02 |
| <b><u>Carbohydrate metabolism</u></b> |        |               |      |                                                                     |          |
| O994_RS13795                          | EF0069 |               | 2.5  | <i>N</i> -acetylmannosamine-6-phosphate 2-epimerase                 | 6.00E-10 |
| O994_RS13385                          | EF0174 | <i>deoC</i>   | 2.1  | 2-deoxyribose-5-phosphate aldolase                                  | 2.00E-06 |
| O994_RS13345                          | EF0185 | <i>deoB</i>   | 1.8  | phosphopentomutase                                                  | 7.60E-04 |
| O994_RS13025                          | EF0253 |               | 3.3  | aldehyde dehydrogenase                                              | 3.50E-18 |
| O994_RS12860                          | EF0271 | <i>arb</i>    | 2.0  | 6-phospho- $\beta$ -glucosidase                                     | 1.10E-04 |
| O994_RS12440                          | EF0413 | <i>mtlD</i>   | 5.2  | mannitol-1-phosphate 5-dehydrogenase                                | 6.50E-15 |
| O994_RS09760                          | EF0423 | <i>eda-1</i>  | 3.0  | keto-hydroxyglutarate-aldolase/keto-deoxy-phosphogluconate aldolase | 8.30E-10 |
| O994_RS02145                          | EF0677 |               | 2.6  | phosphoglucomutase/phosphomannomutase                               | 1.00E-14 |
| O994_RS02625                          | EF0769 |               | 1.5  | PEP phosphonmutase                                                  | 7.90E-02 |
| O994_RS03215                          | EF0900 | <i>adhE</i>   | 1.5  | bifunctional acetaldehyde-CoA/alcohol dehydrogenase                 | 3.10E-02 |
| O994_RS03485                          | EF0955 |               | 1.4  | aldose 1-epimerase                                                  | 3.70E-02 |
| O994_RS03490                          | EF0956 | <i>pgmB</i>   | 1.7  | $\beta$ -phosphoglucomutase                                         | 6.50E-05 |
| O994_RS03495                          | EF0957 |               | 2.0  | maltose phosphorylase                                               | 9.60E-08 |
| O994_RS03805                          | EF1020 |               | 2.0  | glycosyl hydrolase                                                  | 2.80E-05 |
| O994_RS03830                          | EF1024 | <i>ppdK</i>   | 2.3  | pyruvate phosphate dikinase                                         | 7.80E-05 |
| O994_RS04145                          | EF1068 | <i>galM</i>   | 4.7  | aldose 1-epimerase                                                  | 5.80E-55 |
| O994_RS04150                          | EF1069 | <i>galK</i>   | 3.6  | galactokinase                                                       | 1.10E-20 |
| O994_RS04155                          | EF1070 | <i>galE-1</i> | 3.5  | UDP-glucose 4-epimerase                                             | 2.60E-19 |
| O994_RS04160                          | EF1071 | <i>galT</i>   | 2.4  | galactose-1-phosphate uridylyltransferase                           | 2.10E-08 |
| O994_RS04330                          | EF1108 | <i>lutA</i>   | 2.6  | oxidoreductase                                                      | 6.50E-16 |
| O994_RS04340                          | EF1110 |               | 2.1  | lactate utilisation protein C                                       | 1.90E-08 |
| O994_RS04475                          | EF1138 |               | 1.6  | aldo/keto reductase family oxidoreductase                           | 1.20E-02 |
| O994_RS09520                          | EF1213 | <i>alsS</i>   | 1.9  | acetolactate synthase                                               | 6.00E-03 |
| O994_RS05535                          | EF1349 |               | 1.7  | glycosyl hydrolase                                                  | 2.40E-03 |
| O994_RS05555                          | EF1354 | <i>pdhB</i>   | 1.5  | pyruvate dehydrogenase complex, E1 component subunit $\beta$        | 9.10E-02 |
| O994_RS05560                          | EF1355 | <i>aceF</i>   | 1.8  | adihydrolipoamide acetyltransferase                                 | 1.00E-03 |
| O994_RS05565                          | EF1356 | <i>lpdA</i>   | 1.6  | dihydrolipoamide dehydrogenase                                      | 3.20E-03 |
| O994_RS05575                          | EF1358 | <i>gldA</i>   | 3.5  | glycerol dehydrogenase                                              | 5.20E-28 |

|              |        |               |     |                                                              |          |
|--------------|--------|---------------|-----|--------------------------------------------------------------|----------|
| O994_RS05740 | EF1390 | <i>fdhA</i>   | 1.9 | NAD-dependent formate dehydrogenase subunit $\alpha$         | 1.10E-02 |
| O994_RS06455 | EF1526 | <i>gap-1</i>  | 2.4 | glyceraldehyde 3-phosphate dehydrogenase                     | 7.60E-09 |
| O994_RS06810 | EF1602 |               | 4.9 | glycosyl hydrolase                                           | 1.90E-68 |
| O994_RS06860 | EF1612 | <i>pflA</i>   | 1.3 | pyruvate formate-lyase activating enzyme                     | 8.80E-02 |
| O994_RS06865 | EF1613 | <i>pflB</i>   | 1.8 | formate acetyltransferase                                    | 2.30E-06 |
| O994_RS06945 | EF1630 | <i>eutA</i>   | 1.8 | ethanolamine utilisation protein                             | 4.50E-03 |
| O994_RS06965 | EF1635 | <i>pduQ</i>   | 2.2 | propanol dehydrogenase                                       | 6.00E-05 |
| O994_RS06975 | EF1638 | <i>pduV</i>   | 1.6 | propanediol utilization protein                              | 3.40E-02 |
| O994_RS07090 | EF1661 | <i>bkdD</i>   | 4.5 | branched-chain $\alpha$ -keto acid dehydrogenase             | 4.20E-14 |
| O994_RS07095 | EF1663 | <i>ptb</i>    | 6.3 | branched-chain phosphotransacylase                           | 5.30E-13 |
| O994_RS07115 | EF1667 |               | 2.2 | short chain dehydrogenase                                    | 2.00E-06 |
| O994_RS07780 | EF1805 |               | 3.1 | glycosyl hydrolase                                           | 1.50E-09 |
| O994_RS07785 | EF1806 |               | 1.7 | hexose kinase                                                | 2.20E-02 |
| O994_RS01710 | EF1807 | <i>lacD-2</i> | 2.7 | tagatose 1,6-diphosphate aldolase                            | 3.90E-07 |
| O994_RS01700 | EF1834 | <i>lacB</i>   | 3.5 | galactose-6-phosphate isomerase subunit                      | 2.40E-24 |
| O994_RS01695 | EF1835 | <i>lacA</i>   | 3.7 | galactose-6-phosphate isomerase subunit                      | 2.90E-31 |
| O994_RS08210 | EF1918 | <i>pglA</i>   | 2.6 | hypothetical protein                                         | 3.10E-18 |
| O994_RS08345 | EF1950 |               | 4.0 | glucosamine-fructose-6-phosphate aminotransferase            | 5.10E-19 |
| O994_RS08350 | EF1951 |               | 4.7 | phosphosugar-binding protein                                 | 6.70E-26 |
| O994_RS08965 | EF2073 | <i>prsA-1</i> | 1.5 | ribose-phosphate pyrophosphokinase                           | 5.60E-02 |
| O994_RS09890 | EF2401 | <i>acyP</i>   | 2.0 | acylphosphatase                                              | 1.30E-04 |
| O994_RS09995 | EF2425 |               | 1.6 | phosphoglucomutase/phosphomannomutase                        | 2.30E-03 |
| O994_RS10460 | EF2559 |               | 1.7 | pyruvate flavodoxin/ferredoxin oxidoreductase family protein | 3.00E-03 |
| O994_RS12005 | EF2961 | <i>rbsK</i>   | 1.5 | ribokinase                                                   | 6.30E-02 |
| O994_RS00695 | EF3140 |               | 3.2 | iron-containing alcohol dehydrogenase                        | 2.40E-21 |
| O994_RS00690 | EF3141 |               | 3.7 | D-isomer specific 2-hydroxyacid dehydrogenase family protein | 5.70E-29 |
| O994_RS00685 | EF3142 | <i>gnd</i>    | 4.2 | 6-phosphogluconate dehydrogenase                             | 4.40E-37 |
| O994_RS00300 | EF3235 |               | 1.8 | gluconate kinase                                             | 3.40E-05 |
| O994_RS14240 | EF3310 |               | 6.6 | sorbitol-6-phosphate 2-dehydrogenase                         | 2.70E-38 |
| O994_RS14210 | EF3316 | <i>maeE</i>   | 1.7 | malic enzyme family protein                                  | 2.30E-03 |
| O994_RS14205 | EF3317 | <i>citM</i>   | 2.9 | oxaloacetate decarboxylase                                   | 7.60E-14 |

|                                                |        |               |      |                                                                |          |
|------------------------------------------------|--------|---------------|------|----------------------------------------------------------------|----------|
| O994_RS14170                                   | EF3324 |               | 4.3  | sodium ion-translocating decarboxylase subunit $\beta$         | 9.20E-46 |
| O994_RS14165                                   | EF3325 |               | 4.8  | acetyl-CoA carboxylase biotin carboxyl carrier protein subunit | 6.10E-53 |
| O994_RS13850                                   | EF0059 | <i>glmU</i>   | -1.6 | UDP- <i>N</i> -acetylglucosamine pyrophosphorylase             | 1.00E-02 |
| O994_RS03195                                   | EF0895 |               | -1.8 | glycerol dehydrogenase                                         | 5.30E-02 |
| O994_RS03460                                   | EF0949 | <i>eutD</i>   | -1.9 | phosphotransacetylase                                          | 2.10E-05 |
| O994_RS06885                                   | EF1617 | <i>eutQ</i>   | -3.2 | hypothetical protein                                           | 1.40E-08 |
| O994_RS06890                                   | EF1618 | <i>eutH</i>   | -3.6 | ethanolamine utilization protein                               | 1.50E-17 |
| O994_RS06905                                   | EF1621 |               | -3.5 | phosphate propanoyltransferase                                 | 2.30E-11 |
| O994_RS00600                                   | EF3163 | <i>prsA-2</i> | -3.6 | ribose-phosphate pyrophosphokinase                             | 2.30E-27 |
| <b><u>Cellular community</u></b>               |        |               |      |                                                                |          |
| O994_RS00880                                   | EF3106 | <i>opp2A</i>  | 2.9  | oligopeptide ABC transporter substrate-binding protein         | 2.10E-19 |
| O994_RS00875                                   | EF3107 | <i>opp2C</i>  | 2.8  | oligopeptide ABC transporter permease                          | 4.10E-15 |
| <b><u>Energy metabolism</u></b>                |        |               |      |                                                                |          |
| O994_RS10470                                   | EF2561 |               | 2.4  | ferredoxin-NADP(+) reductase subunit $\alpha$                  | 8.80E-09 |
| O994_RS01165                                   | EF3037 | <i>pepA</i>   | 3.0  | glutamyl-aminopeptidase                                        | 1.10E-17 |
| O994_RS10465                                   | EF2560 | <i>gltA</i>   | 2.1  | oxidoreductase                                                 | 5.90E-06 |
| O994_RS10685                                   | EF2607 | <i>atpC</i>   | 1.5  | F <sub>0</sub> F <sub>1</sub> ATP synthase subunit $\epsilon$  | 1.50E-02 |
| O994_RS10690                                   | EF2608 | <i>atpD</i>   | 1.8  | F <sub>0</sub> F <sub>1</sub> ATP synthase subunit $\beta$     | 2.60E-03 |
| O994_RS06270                                   | EF1492 |               | -2.9 | V-type ATPase subunit F                                        | 3.40E-22 |
| O994_RS06275                                   | EF1493 |               | -2.2 | V-type ATP synthase subunit I                                  | 5.00E-11 |
| O994_RS06280                                   | EF1494 |               | -1.5 | V-type ATP synthase subunit K                                  | 2.10E-02 |
| O994_RS07325                                   | EF1711 |               | -1.8 | carbonic anhydrase                                             | 5.70E-03 |
| O994_RS00200                                   | EF3257 |               | -2.1 | pyridine nucleotide-disulfide family oxidoreductase            | 3.20E-05 |
| <b><u>Folding, sorting and degradation</u></b> |        |               |      |                                                                |          |
| O994_RS07025                                   | EF1646 | <i>hslU</i>   | -2.6 | heat shock protein                                             | 1.00E-11 |
| O994_RS12640                                   | EF0371 |               | -3.3 | class V aminotransferase                                       | 3.20E-28 |
| O994_RS02950                                   | EF0846 |               | -1.7 | DEAD/DEAH box helicase                                         | 6.30E-04 |
| O994_RS04635                                   | EF1170 | <i>rho</i>    | -2.1 | transcription termination factor                               | 4.20E-07 |
| O994_RS08950                                   | EF2070 | <i>mnmA</i>   | -2.7 | tRNA-specific 2-thiouridylase                                  | 1.50E-16 |

|              |        |             |      |                                            |          |
|--------------|--------|-------------|------|--------------------------------------------|----------|
| O994_RS09650 | EF2380 | <i>rseP</i> | -1.5 | membrane-associated zinc metalloprotease   | 2.50E-02 |
| O994_RS10750 | EF2620 | <i>secG</i> | -2.8 | preprotein translocase subunit             | 4.00E-11 |
| O994_RS11250 | EF2730 | <i>secE</i> | -3.8 | preprotein translocase subunit             | 2.60E-14 |
| O994_RS11970 | EF2934 | <i>thiI</i> | -2.8 | thiazole biosynthesis protein              | 4.20E-11 |
| O994_RS01035 | EF3064 | <i>pnpA</i> | -2.7 | polynucleotide phosphorylase/polyadenylase | 3.10E-13 |

### **Glycan biosynthesis and metabolism**

|              |        |                |      |                                                                  |          |
|--------------|--------|----------------|------|------------------------------------------------------------------|----------|
| O994_RS13605 | EF0114 |                | 1.6  | glycosyl hydrolase                                               | 5.20E-03 |
| O994_RS06105 | EF1460 |                | 2.2  | LysM domain-containing protein                                   | 2.30E-05 |
| O994_RS07305 | EF1707 |                | 2.2  | glycosyl hydrolase                                               | 2.00E-06 |
| O994_RS10235 | EF2476 | <i>pbp4(5)</i> | 1.7  | penicillin-binding protein 4                                     | 2.10E-04 |
| O994_RS10850 | EF2644 |                | 1.7  | diacylglycerol kinase catalytic subunit                          | 3.60E-04 |
| O994_RS02100 | EF0668 | <i>murE</i>    | -2.0 | UDP- <i>N</i> -acetylmuramoylalanyl-D-glutamate--L-lysine ligase | 1.60E-05 |
| O994_RS02105 | EF0669 |                | -2.6 | polysaccharide biosynthesis family protein                       | 1.20E-11 |
| O994_RS04630 | EF1169 | <i>murAB</i>   | -2.5 | UDP- <i>N</i> -acetylglucosamine 1-carboxyvinyltransferase       | 1.10E-09 |
| O994_RS04645 | EF1172 |                | -4.2 | teichoic acid biosynthesis protein B                             | 5.30E-17 |
| O994_RS08165 | EF1908 | <i>murC</i>    | -2.9 | UDP- <i>N</i> -acetylmuramate-L-alanine ligase                   | 5.70E-18 |
| O994_RS08320 | EF1945 |                | -2.3 | putative polyglycerophosphate lipoteichoic acids                 | 4.10E-06 |
| O994_RS09160 | EF2172 | <i>ispD</i>    | -2.2 | 2-C-methyl-D-erythritol 4-phosphate cytidyltransferase           | 6.30E-07 |
| O994_RS09175 | EF2175 |                | -2.2 | licD-like protein                                                | 6.60E-06 |
| O994_RS09275 | EF2198 | <i>tagO</i>    | -2.0 | glycosyl transferase family protein                              | 3.70E-06 |
| O994_RS10675 | EF2605 | <i>murAA</i>   | -2.8 | UDP- <i>N</i> -acetylglucosamine 1-carboxyvinyltransferase 1     | 1.20E-19 |
| O994_RS10920 | EF2658 |                | -2.6 | FemAB family protein                                             | 5.70E-14 |
| O994_RS11345 | EF2750 | <i>dltX</i>    | -1.6 | teichoic acid D-ala incorporation-associated protein             | 5.00E-02 |
| O994_RS01055 | EF3060 |                | -2.2 | peptidoglycan DL-endopeptidase                                   | 1.10E-07 |

### **Lipid Metabolism**

|              |        |             |     |                                    |          |
|--------------|--------|-------------|-----|------------------------------------|----------|
| O994_RS04675 | EF1359 |             | 1.8 | hypothetical protein               | 2.30E-05 |
| O994_RS05580 | EF1359 | <i>dhaM</i> | 3.3 | hypothetical protein               | 3.00E-22 |
| O994_RS05585 | EF1360 | <i>dhaK</i> | 3.1 | dihydroxyacetone kinase            | 5.90E-19 |
| O994_RS05590 | EF1361 | <i>dhaL</i> | 2.7 | dihydroxyacetone kinase            | 3.60E-12 |
| O994_RS08255 | EF1928 | <i>glpO</i> | 2.9 | $\alpha$ -glycerophosphate oxidase | 4.40E-18 |

|              |        |             |      |                                                            |          |
|--------------|--------|-------------|------|------------------------------------------------------------|----------|
| O994_RS08260 | EF1929 | <i>glpK</i> | 3.2  | glycerol kinase                                            | 5.00E-18 |
| O994_RS01370 | EF3005 |             | 2.7  | choloylglycine hydrolase                                   | 4.10E-15 |
| O994_RS06665 | EF1570 |             | -2.2 | DegV family protein                                        | 9.40E-09 |
| O994_RS06995 | EF1643 | <i>plsY</i> | -2.9 | hypothetical protein                                       | 1.90E-09 |
| O994_RS08150 | EF1904 |             | -1.7 | glycerophosphoryl diester phosphodiesterase family protein | 7.30E-02 |
| O994_RS09115 | EF2163 |             | -2.1 | glycerophosphoryl diester phosphodiesterase                | 5.10E-03 |
| O994_RS11070 | EF2691 | <i>plsC</i> | -1.6 | 1-acyl-sn-glycerol-3-phosphate acyltransferase             | 6.20E-02 |
| O994_RS11705 | EF2883 | <i>fabK</i> | -1.8 | enoyl-ACP reductase                                        | 6.10E-05 |
| O994_RS11715 | EF2885 | <i>fabH</i> | -1.8 | 3-oxoacyl-ACP synthase III                                 | 1.60E-05 |

### **Membrane transport**

|              |        |               |     |                                                                  |          |
|--------------|--------|---------------|-----|------------------------------------------------------------------|----------|
| O994_RS14035 | EF0019 | <i>mptA</i>   | 1.4 | PTS system transporter subunit IIB                               | 4.60E-02 |
| O994_RS14030 | EF0020 | <i>mptAB</i>  | 2.1 | PTS system mannose-specific transporter subunit IIAB             | 5.70E-11 |
| O994_RS14025 | EF0021 | <i>mptC</i>   | 2.1 | PTS system mannose-specific transporter subunit IIC              | 8.60E-12 |
| O994_RS14020 | EF0022 | <i>mptD</i>   | 1.8 | PTS system mannose-specific transporter subunit IID              | 2.40E-07 |
| O994_RS13625 | EF0108 | <i>arcD</i>   | 6.5 | C4-dicarboxylate transporter                                     | 1.20E-26 |
| O994_RS13375 | EF0176 |               | 2.0 | hypothetical protein                                             | 3.20E-04 |
| O994_RS13370 | EF0177 |               | 1.9 | hypothetical protein                                             | 1.10E-06 |
| O994_RS13365 | EF0178 |               | 1.7 | ABC transporter ATP-binding protein                              | 4.60E-04 |
| O994_RS13360 | EF0179 |               | 1.6 | ABC transporter permease                                         | 7.20E-03 |
| O994_RS12865 | EF0270 |               | 2.1 | PTS system $\beta$ -glucoside-specific transporter subunit IIABC | 1.10E-07 |
| O994_RS12575 | EF0385 |               | 3.5 | major facilitator family transporter                             | 2.60E-15 |
| O994_RS12525 | EF0396 |               | 1.5 | AI-2E family transporter                                         | 4.90E-02 |
| O994_RS12450 | EF0411 |               | 6.5 | PTS system mannitol-specific transporter subunit IIBC            | 1.20E-26 |
| O994_RS12445 | EF0412 | <i>mltF</i>   | 5.5 | PTS system mannitol-specific transporter subunit IIA             | 6.70E-17 |
| O994_RS02205 | EF0688 |               | 1.7 | ABC transporter ATP-binding protein                              | 1.10E-03 |
| O994_RS02230 | EF0693 | <i>fruK-1</i> | 1.7 | 1-phosphofructokinase                                            | 4.50E-02 |
| O994_RS02235 | EF0694 |               | 2.3 | PTS system fructose-specific transporter subunit IIBC            | 7.80E-04 |
| O994_RS03040 | EF0862 |               | 1.7 | glycine betaine/carnitine/choline ABC transporter permease       | 5.10E-04 |
| O994_RS03045 | EF0863 |               | 2.0 | glycine betaine/carnitine/choline ABC transporter                | 1.20E-05 |
| O994_RS03050 | EF0864 |               | 2.1 | glycine betaine/carnitine/choline ABC transporter permease       | 3.40E-06 |

|              |        |             |     |                                                                   |          |
|--------------|--------|-------------|-----|-------------------------------------------------------------------|----------|
| O994_RS03055 | EF0865 |             | 1.6 | glycine betaine/carnitine/choline transporter ATP-binding protein | 1.10E-02 |
| O994_RS03075 | EF0871 |             | 1.4 | cation transporter E1-E2 family ATPase                            | 6.80E-02 |
| O994_RS03095 | EF0875 |             | 2.0 | copper-translocating P-type ATPase                                | 3.30E-06 |
| O994_RS03275 | EF0912 |             | 1.4 | peptide ABC transporter ATP-binding protein                       | 6.70E-02 |
| O994_RS03405 | EF0938 | <i>ugpC</i> | 2.6 | sugar ABC transporter ATP-binding protein                         | 4.10E-21 |
| O994_RS03500 | EF0958 |             | 1.7 | PTS system transporter subunit IIABC                              | 2.00E-05 |
| O994_RS03765 | EF1012 |             | 2.1 | PTS system transporter subunit IIB                                | 1.10E-03 |
| O994_RS03770 | EF1013 |             | 2.1 | PTS system transporter subunit IIC                                | 1.70E-05 |
| O994_RS03790 | EF1017 |             | 1.9 | PTS system transporter subunit IIB                                | 3.40E-07 |
| O994_RS03795 | EF1018 |             | 2.0 | PTS system transporter subunit IIA                                | 5.30E-08 |
| O994_RS01715 | EF1018 |             | 2.5 | PTS system transporter subunit IIA                                | 3.20E-05 |
| O994_RS03800 | EF1019 |             | 2.0 | PTS system transporter subunit IIC                                | 2.00E-07 |
| O994_RS04585 | EF1160 |             | 3.3 | PTS system cellobiose-specific transporter subunit IIC            | 5.50E-11 |
| O994_RS04940 | EF1232 |             | 2.2 | ABC transporter permease                                          | 2.40E-05 |
| O994_RS04945 | EF1233 |             | 1.8 | ABC transporter permease                                          | 1.70E-02 |
| O994_RS04950 | EF1234 |             | 2.0 | ABC transporter substrate-binding protein                         | 1.30E-04 |
| O994_RS05420 | EF1320 |             | 2.0 | ABC transporter ATP-binding protein                               | 2.00E-06 |
| O994_RS05425 | EF1321 |             | 1.7 | permease domain-containing protein                                | 2.50E-04 |
| O994_RS06470 | EF1529 |             | 2.1 | PTS system transporter subunit IIC                                | 3.90E-04 |
| O994_RS06805 | EF1601 |             | 4.3 | PTS system transporter subunit IIABC                              | 7.40E-36 |
| O994_RS07765 | EF1802 |             | 2.1 | PTS system transporter subunit IID                                | 4.30E-03 |
| O994_RS07770 | EF1803 |             | 2.6 | PTS system transporter subunit IIC                                | 1.10E-06 |
| O994_RS07775 | EF1804 |             | 2.5 | PTS system transporter subunit IIB                                | 8.70E-05 |
| O994_RS09755 | EF1836 |             | 2.3 | PTS system transporter subunit IIA                                | 1.70E-04 |
| O994_RS09745 | EF1838 |             | 1.7 | PTS system transporter subunit IIC                                | 2.90E-02 |
| O994_RS08220 | EF1920 |             | 4.0 | C4-dicarboxylate anaerobic carrier                                | 7.00E-23 |
| O994_RS08250 | EF1927 | <i>glpF</i> | 2.4 | glycerol uptake facilitator protein                               | 9.70E-08 |
| O994_RS08355 | EF1952 |             | 5.5 | PTS system transporter subunit IID                                | 2.00E-21 |
| O994_RS08360 | EF1953 |             | 5.5 | PTS system transporter subunit IIC                                | 8.50E-34 |
| O994_RS09350 | EF2213 |             | 2.7 | PTS system transporter subunit IIBC                               | 1.40E-16 |
| O994_RS09395 | EF2222 |             | 2.0 | ABC transporter permease                                          | 1.00E-03 |



|              |        |              |      |                                                       |          |
|--------------|--------|--------------|------|-------------------------------------------------------|----------|
| O994_RS09400 | EF2223 |              | 2.3  | ABC transporter permease                              | 3.70E-08 |
| O994_RS10665 | EF2603 |              | 1.4  | PTS system transporter subunit IIA                    | 9.90E-02 |
| O994_RS10865 | EF2647 | <i>grtP</i>  | 2.2  | gluconate-proton symporter                            | 6.40E-05 |
| O994_RS12020 | EF2964 | <i>ulaA</i>  | 3.1  | PTS system ascorbate-specific transporter subunit IIC | 2.60E-13 |
| O994_RS12025 | EF2965 |              | 3.3  | hypothetical protein                                  | 2.50E-19 |
| O994_RS09765 | EF2986 |              | 3.6  | ABC transporter ATP-binding protein                   | 5.10E-24 |
| O994_RS01360 | EF3007 |              | 1.7  | chloride ion channel protein                          | 1.20E-03 |
| O994_RS01205 | EF3029 |              | 1.9  | PTS system transporter subunit IID                    | 2.00E-03 |
| O994_RS01200 | EF3030 |              | 2.1  | PTS system transporter subunit IIC                    | 1.10E-05 |
| O994_RS01195 | EF3031 |              | 2.1  | PTS system transporter subunit IIB                    | 2.80E-04 |
| O994_RS01185 | EF3033 |              | 2.0  | PTS system transporter subunit IIA                    | 9.50E-03 |
| O994_RS00870 | EF3108 | <i>opp2B</i> | 2.2  | oligopeptide ABC transporter permease                 | 1.00E-09 |
| O994_RS00865 | EF3109 | <i>opp2F</i> | 1.4  | oligopeptide ABC transporter ATP-binding protein      | 8.60E-02 |
| O994_RS00715 | EF3136 |              | 2.1  | PTS system transporter subunit IIA                    | 3.10E-03 |
| O994_RS00710 | EF3137 |              | 2.3  | PTS system transporter subunit IIB                    | 6.30E-05 |
| O994_RS00705 | EF3138 |              | 2.7  | PTS system transporter subunit IID                    | 6.90E-08 |
| O994_RS00700 | EF3139 |              | 3.0  | PTS system transporter subunit IIC                    | 8.00E-14 |
| O994_RS00375 | EF3210 |              | 4.9  | PTS system transporter subunit IIA                    | 2.40E-60 |
| O994_RS00370 | EF3211 |              | 5.1  | PTS system transporter subunit IIB                    | 1.70E-52 |
| O994_RS00365 | EF3212 |              | 4.9  | PTS system transporter subunit IIC                    | 7.70E-49 |
| O994_RS00360 | EF3213 |              | 4.2  | PTS system transporter subunit IID                    | 8.60E-39 |
| O994_RS14260 | EF3306 |              | 3.6  | PTS system sorbitol-specific transporter subunit IIBC | 2.00E-13 |
| O994_RS14255 | EF3307 | <i>srlA</i>  | 3.5  | PTS system sorbitol-specific transporter subunit IIC  | 8.60E-11 |
| O994_RS14155 | EF3327 |              | 4.9  | citrate transporter                                   | 4.30E-83 |
| O994_RS14045 | EF0017 |              | -2.7 | ABC-F family ATPase                                   | 1.70E-19 |
| O994_RS13695 | EF0094 |              | -2.3 | formate/nitrite transporter family protein            | 5.30E-05 |
| O994_RS13100 | EF0238 | <i>cbiO</i>  | -1.5 | cobalt transporter ATP-binding protein                | 5.90E-02 |
| O994_RS01930 | EF0635 |              | -4.3 | amino acid permease                                   | 1.20E-41 |
| O994_RS01935 | EF0636 | <i>nhaC</i>  | -3.7 | Na <sup>+</sup> /H <sup>+</sup> antiporter            | 2.40E-27 |
| O994_RS02260 | EF0699 |              | -1.6 | AI-2E family transporter                              | 1.50E-02 |

|              |        |               |      |                                                        |          |
|--------------|--------|---------------|------|--------------------------------------------------------|----------|
| O994_RS02395 | EF0720 |               | -2.8 | voltage-gated chloride channel family protein          | 3.00E-11 |
| O994_RS02485 | EF0739 | <i>pnuC</i>   | -3.5 | nicotinamide mononucleotide transporter                | 1.40E-25 |
| O994_RS02510 | EF0744 |               | -1.7 | sodium/dicarboxylate symporter family protein          | 1.60E-03 |
| O994_RS02575 | EF0758 |               | -2.4 | cadmium-translocating P-type ATPase                    | 8.00E-07 |
| O994_RS02585 | EF0760 |               | -1.7 | amino acid ABC transporter ATP-binding protein         | 5.50E-02 |
| O994_RS02590 | EF0761 |               | -3.2 | amino acid ABC transporter amino acid-binding/permease | 2.50E-20 |
| O994_RS02720 | EF0789 |               | -2.3 | ABC transporter ATP-binding protein                    | 1.90E-04 |
| O994_RS03030 | EF0860 |               | -2.6 | APC family permease                                    | 1.30E-10 |
| O994_RS03085 | EF0872 |               | -2.2 | potassium uptake protein                               | 4.80E-08 |
| O994_RS03355 | EF0928 |               | -3.8 | glucose uptake protein                                 | 4.60E-19 |
| O994_RS03360 | EF0929 |               | -5.0 | amino acid permease                                    | 3.40E-24 |
| O994_RS04190 | EF1078 | <i>emeA</i>   | -2.5 | multidrug efflux MFS transporter                       | 3.50E-09 |
| O994_RS04465 | EF1135 | <i>mscS</i>   | -1.5 | mechanosensitive ion channel protein                   | 7.70E-02 |
| O994_RS05495 | EF1341 | <i>macA</i>   | -1.8 | ABC transporter ATP-binding protein/permease           | 1.20E-02 |
| O994_RS05545 | EF1352 | <i>mgtA</i>   | -1.4 | magnesium-translocating P-type ATPase                  | 6.60E-02 |
| O994_RS05790 | EF1400 |               | -2.8 | cadmium-translocating P-type ATPase                    | 1.20E-14 |
| O994_RS06425 | EF1519 |               | -2.7 | cation transporter E1-E2 family ATPase                 | 2.10E-16 |
| O994_RS06525 | EF1541 |               | -1.5 | riboflavin transporter                                 | 9.00E-02 |
| O994_RS06685 | EF1574 |               | -1.6 | Na <sup>+</sup> /H <sup>+</sup> antiporter             | 5.20E-03 |
| O994_RS06835 | EF1607 |               | -1.6 | PTS transporter subunit EIIC                           | 2.80E-02 |
| O994_RS07050 | EF1654 | <i>ylqF</i>   | -3.2 | GTPase                                                 | 4.10E-13 |
| O994_RS07370 | EF1720 |               | -2.4 | uracil permease                                        | 2.00E-04 |
| O994_RS07430 | EF1733 |               | -2.8 | ABC transporter ATP-binding protein/peptidase          | 1.30E-13 |
| O994_RS07565 | EF1758 | <i>pstC</i>   | -1.6 | phosphate ABC transporter permease                     | 1.30E-02 |
| O994_RS07570 | EF1759 |               | -1.6 | phosphate ABC transporter substrate-binding protein    | 9.50E-03 |
| O994_RS07970 | EF1867 |               | -1.9 | ABC transporter permease                               | 9.50E-03 |
| O994_RS08840 | EF2047 |               | -4.3 | amino acid permease                                    | 6.80E-30 |
| O994_RS09065 | EF2153 |               | -2.0 | ABC transporter ATP-binding protein                    | 2.20E-05 |
| O994_RS09215 | EF2183 |               | -2.2 | ABC transporter permease                               | 3.30E-05 |
| O994_RS10175 | EF2460 | <i>typA</i>   | -3.6 | GTP-binding protein                                    | 2.40E-33 |
| O994_RS10340 | EF2498 | <i>metN-2</i> | -2.1 | ABC transporter ATP-binding protein                    | 1.80E-05 |

|                                                        |        |               |      |                                                                |           |
|--------------------------------------------------------|--------|---------------|------|----------------------------------------------------------------|-----------|
| O994_RS10880                                           | EF2650 |               | -1.6 | spermidine/putrescine ABC transporter permease                 | 5.30E-02  |
| O994_RS10885                                           | EF2651 |               | -1.9 | spermidine/putrescine ABC transporter permease                 | 5.70E-03  |
| O994_RS10890                                           | EF2652 |               | -2.2 | spermidine/putrescine ABC transporter ATP-binding protein      | 7.80E-07  |
| O994_RS10925                                           | EF2659 |               | -1.8 | QueT transporter family protein                                | 2.80E-03  |
| O994_RS11655                                           | EF2873 | <i>yqeH</i>   | -2.2 | GTP-binding protein                                            | 4.40E-08  |
| O994_RS11975                                           | EF2935 |               | -2.5 | xanthine/uracil permeases family protein                       | 4.20E-07  |
| O994_RS01375                                           | EF3004 |               | -2.3 | sulfate transporter family protein                             | 6.60E-08  |
| O994_RS01240                                           | EF3022 |               | -3.3 | sodium:dicarboxylate symporter family protein                  | 2.70E-13  |
| O994_RS01150                                           | EF3041 |               | -1.6 | pheromone binding protein                                      | 3.40E-02  |
| O994_RS01010                                           | EF3069 |               | -4.2 | formate/nitrite transporter family protein                     | 1.30E-13  |
| <b><u>Metabolism of cofactors and vitamins</u></b>     |        |               |      |                                                                |           |
| O994_RS12270                                           | EF0449 | <i>menH</i>   | 1.5  | 2-succinyl-6-hydroxy-2,4-cyclohexadiene-1-carboxylate synthase | 3.70E-02  |
| O994_RS10510                                           | EF2569 |               | 3.1  | hypothetical protein                                           | 1.30E-12  |
| O994_RS02965                                           | EF0848 | <i>acpS</i>   | -1.8 | holo-ACP synthase                                              | 1.00E-03  |
| O994_RS05245                                           | EF1295 | <i>ribF</i>   | -2.1 | riboflavin biosynthesis protein                                | 7.60E-03  |
| O994_RS08435                                           | EF1969 |               | -1.5 | phosphomethylpyrimidine kinase                                 | 7.00E-02  |
| O994_RS08880                                           | EF2056 | <i>ubiA</i>   | -1.7 | 1,4-dihydroxy-2-naphthoate octaprenyltransferase               | 4.00E-04  |
| <b><u>Metabolism of other amino acids</u></b>          |        |               |      |                                                                |           |
| O994_RS09845                                           | EF2392 |               | 1.6  | class V aminotransferase                                       | 1.00E-03  |
| O994_RS10500                                           | EF2567 | <i>seld</i>   | 2.9  | selenide, water dikinase                                       | 3.20E-12  |
| O994_RS10565                                           | EF2581 |               | 3.7  | selenate reductase subunit                                     | 2.20E-23  |
| O994_RS11290                                           | EF2738 |               | 1.7  | thioredoxin reductase/glutathione-like protein                 | 2.40E-04  |
| O994_RS03365                                           | EF0930 | <i>metG</i>   | -2.2 | methionyl-tRNA synthetase                                      | 4.10E-08  |
| <b><u>Metabolism of terpenoids and polyketides</u></b> |        |               |      |                                                                |           |
| O994_RS13875                                           | EF0051 | <i>ipk</i>    | -2.4 | 4-diphosphocytidyl-2C-methyl-D-erythritol kinase               | 4.70E-08  |
| O994_RS03235                                           | EF0904 | <i>mvk</i>    | -2.1 | mevalonate kinase                                              | 5.90E-04  |
| <b><u>Nucleotide metabolism</u></b>                    |        |               |      |                                                                |           |
| O994_RS13845                                           | EF0062 |               | 2.3  | 5'-nucleotidase                                                | 6.90E-09  |
| O994_RS13635                                           | EF0106 | <i>arcC-1</i> | 8.3  | carbamate kinase                                               | 1.50E-110 |

|              |        |               |      |                                                           |          |
|--------------|--------|---------------|------|-----------------------------------------------------------|----------|
| O994_RS13390 | EF0173 | <i>pyn</i>    | 1.7  | pyrimidine-nucleoside phosphorylase                       | 3.20E-03 |
| O994_RS13380 | EF0175 | <i>cdd</i>    | 2.3  | cytidine deaminase                                        | 6.20E-07 |
| O994_RS12570 | EF0386 | <i>arcC-2</i> | 3.0  | carbamate kinase                                          | 4.10E-03 |
| O994_RS02910 | EF0837 |               | 2.3  | dihydroorotase                                            | 1.00E-04 |
| O994_RS03890 | EF1036 | <i>ndk</i>    | 1.7  | nucleoside diphosphate kinase                             | 3.00E-03 |
| O994_RS08225 | EF1921 | <i>rihC</i>   | 3.9  | ribonucleoside hydrolase                                  | 8.60E-28 |
| O994_RS10560 | EF2580 | <i>hydA</i>   | 3.1  | phenylhydantoinase                                        | 7.50E-10 |
| O994_RS14325 | EF3293 | <i>guaB</i>   | 1.6  | inosine 5'-monophosphate dehydrogenase                    | 2.40E-04 |
| O994_RS13855 | EF0058 | <i>purR</i>   | -3.3 | pur operon repressor                                      | 6.70E-23 |
| O994_RS13400 | EF0171 | <i>adD</i>    | -2.0 | adenosine deaminase                                       | 3.40E-03 |
| O994_RS12975 | EF0264 | <i>hpt</i>    | -1.7 | hypoxanthine-guanine phosphoribosyltransferase            | 1.30E-02 |
| O994_RS12155 | EF0471 | <i>nrdE</i>   | -1.4 | ribonucleotide-diphosphate reductase subunit $\alpha$     | 5.50E-02 |
| O994_RS02845 | EF0825 | <i>udk</i>    | -4.3 | uridine kinase                                            | 2.90E-22 |
| O994_RS04520 | EF1147 | <i>pyrG</i>   | -4.9 | CTP synthetase                                            | 2.50E-57 |
| O994_RS07375 | EF1721 | <i>pyrR</i>   | -4.4 | bifunctional pyrimidine regulatory protein                | 1.20E-14 |
| O994_RS09565 | EF2362 | <i>purK-2</i> | -2.0 | 5-(carboxyamino)imidazole ribonucleotide synthase         | 1.40E-05 |
| O994_RS09575 | EF2364 |               | -2.9 | xanthine permease                                         | 6.70E-11 |
| O994_RS09580 | EF2365 | <i>xpt</i>    | -3.3 | xanthine phosphoribosyltransferase                        | 6.70E-10 |
| O994_RS10445 | EF2555 | <i>tdk</i>    | -2.7 | thymidine kinase                                          | 2.00E-13 |
| O994_RS00755 | EF3127 | <i>gmk</i>    | -3.3 | guanylate kinase                                          | 4.00E-26 |
| O994_RS14320 | EF3293 | <i>guaB</i>   | -2.5 | inosine 5'-monophosphate dehydrogenase                    | 1.10E-10 |
| <b>Other</b> |        |               |      |                                                           |          |
| O994_RS13790 | EF0071 |               | 2.5  | lipoprotein                                               | 3.60E-11 |
| O994_RS13770 | EF0076 |               | 2.5  | short chain dehydrogenase/reductase family oxidoreductase | 1.60E-06 |
| O994_RS13765 | EF0077 | <i>amaP</i>   | 1.9  | alkaline shock response membrane anchor protein           | 6.20E-04 |
| O994_RS13755 | EF0079 |               | 1.6  | gls24 protein                                             | 1.00E-02 |
| O994_RS13750 | EF0080 |               | 1.6  | Asp23/Gls24 family envelope stress response protein       | 9.20E-03 |
| O994_RS13745 | EF0081 |               | 1.5  | GlsB/YeaQ/YmgE family stress response membrane protein    | 8.20E-02 |
| O994_RS12830 | EF0277 | <i>ogt</i>    | 3.1  | methylated-DNA--protein-cysteine S-methyltransferase      | 6.30E-13 |
| O994_RS12250 | EF0453 |               | 2.2  | organic hydroperoxide resistance protein                  | 6.20E-09 |

|              |        |             |     |                                                             |          |
|--------------|--------|-------------|-----|-------------------------------------------------------------|----------|
| O994_RS02150 | EF0678 |             | 2.2 | GNAT family <i>N</i> -acetyltransferase                     | 1.70E-07 |
| O994_RS01630 | EF0706 | <i>clpE</i> | 3.0 | ATP-dependent Clp protease, ATP-binding protein             | 2.10E-22 |
| O994_RS02610 | EF0766 | <i>rapZ</i> | 2.1 | RNase adapter                                               | 2.00E-07 |
| O994_RS02815 | EF0809 |             | 1.8 | GlsB/YeaQ/YmgE family stress response membrane protein      | 1.90E-03 |
| O994_RS03105 | EF0877 |             | 1.9 | aldo/keto reductase family oxidoreductase                   | 4.60E-05 |
| O994_RS03870 | EF1032 | <i>drrC</i> | 2.1 | excinuclease ABC subunit                                    | 2.10E-05 |
| O994_RS03880 | EF1034 |             | 2.1 | aminoglycoside phosphotransferase family protein            | 9.10E-05 |
| O994_RS04185 | EF1077 |             | 2.2 | GNAT family <i>N</i> -acetyltransferase                     | 7.20E-04 |
| O994_RS04250 | EF1092 | <i>ebpB</i> | 1.8 | cell wall surface anchor family protein                     | 6.70E-03 |
| O994_RS04255 | EF1093 | <i>ebpC</i> | 1.9 | cell wall surface anchor family protein                     | 9.70E-04 |
| O994_RS04570 | EF1157 |             | 1.8 | Sapep family Mn(2 <sup>+</sup> )-dependent dipeptidase      | 2.40E-03 |
| O994_RS04575 | EF1158 |             | 3.8 | N4-( $\beta$ - <i>N</i> -acetylglucosaminyl)-L-asparaginase | 1.30E-15 |
| O994_RS04680 | EF1180 |             | 2.0 | CsbD family protein                                         | 5.80E-07 |
| O994_RS04830 | EF1211 | <i>npr</i>  | 2.3 | NADH peroxidase                                             | 7.40E-14 |
| O994_RS05190 | EF1284 |             | 3.9 | structural protein                                          | 2.80E-25 |
| O994_RS05195 | EF1285 |             | 3.6 | major tail protein                                          | 1.60E-20 |
| O994_RS05465 | EF1327 |             | 1.9 | BadF/BadG/BcrA/BcrD ATPase                                  | 4.40E-06 |
| O994_RS06080 | EF1455 | <i>terL</i> | 2.1 | phage terminase large subunit                               | 1.40E-04 |
| O994_RS06090 | EF1457 |             | 1.6 | minor head protein                                          | 5.40E-02 |
| O994_RS06215 | EF1481 |             | 2.0 | tail fiber protein                                          | 1.90E-03 |
| O994_RS07260 | EF1698 |             | 1.8 | NADPH-dependent FMN reductase domain-containing protein     | 6.00E-04 |
| O994_RS07735 | EF1796 |             | 1.5 | lipoprotein                                                 | 9.90E-02 |
| O994_RS08500 | EF1982 | <i>uspA</i> | 3.0 | universal stress protein                                    | 3.40E-22 |
| O994_RS09370 | EF2217 |             | 3.1 | $\alpha$ -1,2-mannosidase                                   | 1.70E-29 |
| O994_RS09835 | EF2390 | <i>sufB</i> | 1.4 | Fe-S cluster assembly protein                               | 8.70E-02 |
| O994_RS09965 | EF2419 |             | 1.9 | kinase/pyrophosphorylase                                    | 1.00E-03 |
| O994_RS10475 | EF2562 |             | 2.8 | flavodoxin                                                  | 4.80E-10 |
| O994_RS10555 | EF2579 | <i>dpaL</i> | 2.7 | diaminopropionate ammonia-lyase                             | 4.40E-02 |
| O994_RS11060 | EF2689 | <i>sbcC</i> | 1.5 | exonuclease                                                 | 9.10E-02 |
| O994_RS11065 | EF2690 | <i>sbcD</i> | 1.5 | exonuclease                                                 | 9.50E-02 |
| O994_RS11295 | EF2739 | <i>ahpC</i> | 1.5 | alkyl hydroperoxide reductase subunit C                     | 3.10E-03 |

|              |        |             |      |                                                  |          |
|--------------|--------|-------------|------|--------------------------------------------------|----------|
| O994_RS11510 | EF2785 |             | 1.9  | oxidoreductase                                   | 4.90E-04 |
| O994_RS01520 | EF2972 |             | 1.7  | amidinotransferase                               | 5.50E-03 |
| O994_RS01190 | EF3032 | <i>btpA</i> | 2.5  | photosystem I biogenesis protein                 | 8.80E-09 |
| O994_RS01175 | EF3035 |             | 2.7  | universal stress protein                         | 4.60E-11 |
| O994_RS01170 | EF3036 |             | 2.8  | thioredoxin family protein                       | 9.40E-13 |
| O994_RS00310 | EF3233 |             | 1.6  | Dps family protein                               | 1.20E-02 |
| O994_RS14275 | EF3303 |             | 1.9  | myosin-cross-reactive antigen                    | 9.60E-06 |
| O994_RS13065 | EF0245 |             | -2.2 | decarboxylase                                    | 6.40E-05 |
| O994_RS12965 | EF0266 |             | -3.6 | chaperonin                                       | 1.30E-16 |
| O994_RS12150 | EF0472 | <i>nrdI</i> | -1.4 | ribonucleotide reductase stimulatory protein     | 6.10E-02 |
| O994_RS12145 | EF0473 | <i>nrdH</i> | -1.7 | ribonucleoside-diphosphate reductase 2           | 1.10E-03 |
| O994_RS12125 | EF0479 |             | -2.1 | phage integrase family site specific recombinase | 4.20E-07 |
| O994_RS02265 | EF0700 |             | -2.2 | hemolysin                                        | 4.70E-09 |
| O994_RS02325 | EF0704 |             | -1.5 | lipoprotein                                      | 4.80E-02 |
| O994_RS02370 | EF0715 | <i>tig</i>  | -2.1 | trigger factor                                   | 9.40E-08 |
| O994_RS02490 | EF0740 |             | -3.0 | deoxynucleoside kinase                           | 4.00E-11 |
| O994_RS02695 | EF0783 |             | -2.1 | acetyltransferase                                | 2.10E-06 |
| O994_RS03015 | EF0858 | <i>pip</i>  | -1.9 | phage infection protein                          | 2.40E-04 |
| O994_RS04480 | EF1139 |             | -2.0 | glutamine amidotransferase                       | 1.30E-02 |
| O994_RS04650 | EF1173 |             | -4.7 | WecB/TagA/CpsF family glycosyl transferase       | 4.70E-05 |
| O994_RS05010 | EF1247 |             | -2.5 | iron-sulfur cluster biosynthesis family protein  | 1.70E-05 |
| O994_RS05250 | EF1296 |             | -2.1 | <i>N</i> -acetyltransferase                      | 1.00E-03 |
| O994_RS05490 | EF1340 |             | -2.9 | pheromone cAM373 lipoprotein                     | 2.90E-07 |
| O994_RS06510 | EF1538 | <i>scpA</i> | -2.7 | segregation and condensation protein A           | 1.80E-15 |
| O994_RS06515 | EF1539 | <i>scpB</i> | -2.4 | SMC-Scp complex subunit                          | 1.00E-09 |
| O994_RS06895 | EF1619 |             | -3.8 | carbon dioxide concentrating mechanism protein   | 4.70E-10 |
| O994_RS09290 | EF2201 |             | -2.2 | flavodoxin                                       | 5.00E-06 |
| O994_RS09535 | EF2352 | <i>lepA</i> | -2.3 | GTP-binding protein                              | 7.70E-11 |
| O994_RS10090 | EF2444 |             | -3.2 | acyl-CoA thioesterase                            | 1.90E-17 |
| O994_RS10310 | EF2492 |             | -1.6 | glycosyl transferase group 2 family protein      | 2.40E-02 |

|              |        |             |      |                                                     |          |
|--------------|--------|-------------|------|-----------------------------------------------------|----------|
| O994_RS10435 | EF2553 | <i>hemK</i> | -1.6 | hemK protein                                        | 4.50E-02 |
| O994_RS10440 | EF2554 | <i>prfA</i> | -1.7 | peptide chain release factor 1                      | 2.80E-04 |
| O994_RS10655 | EF2601 |             | -2.9 | acyl carrier protein                                | 3.60E-14 |
| O994_RS10930 | EF2661 |             | -4.1 | diacylglycerol kinase catalytic subunit             | 3.50E-15 |
| O994_RS10940 | EF2664 |             | -1.9 | phosphoglycerate mutase                             | 1.70E-02 |
| O994_RS11240 | EF2728 |             | -2.3 | lipoprotein                                         | 1.90E-05 |
| O994_RS11300 | EF2740 |             | -2.3 | <i>O</i> -methyltransferase                         | 7.20E-07 |
| O994_RS11660 | EF2874 |             | -2.8 | haloacid dehalogenase (HAD) superfamily             | 6.70E-15 |
| O994_RS11800 | EF2899 |             | -3.0 | pyridine nucleotide-disulfide family oxidoreductase | 6.30E-08 |
| O994_RS01075 | EF3056 |             | -1.7 | class A sortase                                     | 1.90E-02 |
| O994_RS01045 | EF3061 | <i>mreD</i> | -3.0 | rod shape-determining protein                       | 5.00E-10 |
| O994_RS00465 | EF3191 |             | -1.8 | $\alpha/\beta$ hydrolase                            | 8.10E-03 |
| O994_RS14305 | EF3296 | <i>ychF</i> | -2.0 | GTP-dependent nucleic acid-binding protein          | 1.40E-06 |
| O994_RS14295 | EF3298 |             | -2.4 | ParB family chromosome partitioning protein         | 4.90E-08 |
| O994_RS14290 | EF3299 |             | -3.1 | ParaA family ATPase                                 | 7.00E-17 |

#### **Poorly characterised**

|              |        |  |     |                                   |          |
|--------------|--------|--|-----|-----------------------------------|----------|
| O994_RS13760 | EF0078 |  | 1.9 | DUF2273 domain-containing protein | 8.10E-04 |
| O994_RS12870 | EF0269 |  | 2.3 | PRD domain-containing protein     | 1.40E-11 |
| O994_RS12820 | EF0279 |  | 1.6 | HD domain-containing protein      | 8.20E-02 |
| O994_RS12580 | EF0383 |  | 3.9 | hypothetical protein              | 1.40E-27 |
| O994_RS14960 | EF0383 |  | 4.8 | hypothetical protein              | 1.70E-64 |
| O994_RS12545 | EF0392 |  | 2.4 | WxL domain-containing protein     | 9.40E-06 |
| O994_RS12520 | EF0397 |  | 1.6 | DUF308 domain-containing protein  | 5.70E-03 |
| O994_RS12475 | EF0405 |  | 2.3 | HAD superfamily hydrolase         | 2.80E-09 |
| O994_RS02080 | EF0665 |  | 1.5 | hypothetical protein              | 4.60E-02 |
| O994_RS02615 | EF0767 |  | 1.5 | YvcK family protein               | 4.40E-02 |
| O994_RS02630 | EF0770 |  | 1.4 | DsbA family protein               | 8.10E-02 |
| O994_RS02820 | EF0819 |  | 1.7 | DUF960 domain-containing protein  | 7.30E-02 |
| O994_RS02865 | EF0829 |  | 2.7 | PRD domain-containing protein     | 2.80E-07 |
| O994_RS02870 | EF0830 |  | 2.7 | glycine-rich SFCGS family protein | 8.30E-07 |
| O994_RS02880 | EF0832 |  | 2.5 | DUF4311 domain-containing protein | 1.10E-04 |

|              |        |     |                                          |          |
|--------------|--------|-----|------------------------------------------|----------|
| O994_RS02885 | EF0833 | 2.2 | DUF4310 family protein                   | 1.50E-03 |
| O994_RS02920 | EF0839 | 2.0 | KDGP aldolase family protein             | 2.20E-02 |
| O994_RS03430 | EF0943 | 2.3 | hypothetical protein                     | 1.50E-06 |
| O994_RS03740 | EF1006 | 2.1 | DUF4828 domain-containing protein        | 4.10E-06 |
| O994_RS03775 | EF1014 | 2.0 | hypothetical protein                     | 1.30E-04 |
| O994_RS03780 | EF1015 | 2.0 | DUF3188 domain-containing protein        | 1.10E-03 |
| O994_RS03810 | EF1021 | 1.9 | GNAT family <i>N</i> -acetyltransferase  | 5.00E-06 |
| O994_RS03885 | EF1035 | 2.7 | DUF4767 domain-containing protein        | 9.10E-13 |
| O994_RS04175 | EF1074 | 2.3 | hypothetical protein                     | 5.90E-06 |
| O994_RS04180 | EF1075 | 2.7 | <i>N</i> -acetyltransferase              | 1.10E-10 |
| O994_RS04335 | EF1109 | 2.4 | iron-sulfur cluster binding protein      | 1.90E-11 |
| O994_RS05050 | EF1200 | 1.9 | threonine/serine exporter family protein | 2.60E-02 |
| O994_RS05200 | EF1286 | 3.7 | hypothetical protein                     | 1.60E-16 |
| O994_RS05210 | EF1288 | 4.3 | hypothetical protein                     | 1.30E-13 |
| O994_RS05595 | EF1362 | 1.7 | hypothetical protein                     | 4.40E-03 |
| O994_RS05630 | EF1368 | 2.5 | hypothetical protein                     | 1.50E-14 |
| O994_RS06085 | EF1456 | 2.2 | DUF1073 domain-containing protein        | 1.00E-05 |
| O994_RS06100 | EF1459 | 2.0 | hypothetical protein                     | 1.00E-03 |
| O994_RS06110 | EF1461 | 2.3 | DUF2213 domain-containing protein        | 4.90E-08 |
| O994_RS06115 | EF1462 | 2.2 | hypothetical protein                     | 1.00E-06 |
| O994_RS06120 | EF1463 | 2.5 | DUF2184 domain-containing protein        | 1.80E-08 |
| O994_RS06125 | EF1464 | 2.6 | hypothetical protein                     | 1.20E-05 |
| O994_RS06135 | EF1465 | 2.2 | hypothetical protein                     | 1.70E-06 |
| O994_RS06140 | EF1467 | 2.1 | hypothetical protein                     | 2.10E-05 |
| O994_RS06145 | EF1468 | 2.2 | hypothetical protein                     | 2.10E-06 |
| O994_RS06150 | EF1469 | 2.1 | DUF3383 family protein                   | 6.00E-07 |
| O994_RS06155 | EF1470 | 1.8 | hypothetical protein                     | 1.40E-02 |
| O994_RS06160 | EF1471 | 2.4 | hypothetical protein                     | 5.70E-05 |
| O994_RS06615 | EF1560 | 1.8 | hypothetical protein                     | 3.10E-04 |
| O994_RS07065 | EF1657 | 3.9 | hypothetical protein                     | 5.50E-22 |
| O994_RS07165 | EF1677 | 2.6 | hypothetical protein                     | 8.70E-08 |



|              |        |             |      |                                                          |          |
|--------------|--------|-------------|------|----------------------------------------------------------|----------|
| O994_RS07310 | EF1708 |             | 1.8  | putative glycosyl hydrolase                              | 9.60E-05 |
| O994_RS07730 | EF1794 |             | 1.5  | DUF2188 domain-containing protein                        | 7.30E-02 |
| O994_RS09310 | EF2205 |             | 2.3  | hypothetical protein                                     | 9.70E-06 |
| O994_RS09330 | EF2209 |             | 1.9  | hypothetical protein                                     | 3.30E-04 |
| O994_RS09480 | EF2239 |             | 2.1  | hypothetical protein                                     | 3.60E-04 |
| O994_RS09840 | EF2391 |             | 1.6  | SUF system NifU family Fe-S cluster assembly protein     | 1.00E-02 |
| O994_RS09850 | EF2393 | <i>sufD</i> | 1.5  | Fe-S cluster assembly protein                            | 5.20E-03 |
| O994_RS10075 | EF2441 |             | 1.6  | DUF47 family protein                                     | 1.90E-02 |
| O994_RS10240 | EF2477 |             | 1.6  | SPFH domain-containing protein                           | 4.90E-03 |
| O994_RS10480 | EF2563 |             | 2.4  | selenium-dependent molybdenum hydroxylase system protein | 6.20E-05 |
| O994_RS10485 | EF2564 |             | 2.3  | hydroxylase accessory protein                            | 1.10E-05 |
| O994_RS10490 | EF2565 |             | 2.3  | DUF3343 domain-containing protein                        | 6.60E-04 |
| O994_RS10495 | EF2566 |             | 2.6  | hypothetical protein                                     | 2.40E-07 |
| O994_RS10515 | EF2570 |             | 3.3  | aldehyde oxidoreductase                                  | 4.10E-21 |
| O994_RS10570 | EF2582 |             | 4.2  | chlorohydrolase/aminohydrolase                           | 7.30E-30 |
| O994_RS11115 | EF2700 |             | 1.7  | MutT/nudix family protein                                | 1.20E-03 |
| O994_RS11135 | EF2702 |             | 1.6  | hypothetical protein                                     | 7.90E-02 |
| O994_RS11180 | EF2713 |             | 2.0  | cell wall surface anchor family protein                  | 5.30E-06 |
| O994_RS11515 | EF2786 |             | 2.3  | DUF488 domain-containing protein                         | 6.90E-09 |
| O994_RS11615 | EF2864 |             | 1.4  | putative lipoprotein                                     | 9.00E-02 |
| O994_RS01245 | EF3021 | <i>gst</i>  | 1.6  | DinB family glutathione transferase                      | 4.10E-02 |
| O994_RS00985 | EF3075 |             | 1.6  | WxL domain-containing protein                            | 1.80E-02 |
| O994_RS00745 | EF3130 |             | 1.5  | hypothetical protein                                     | 2.20E-02 |
| O994_RS00735 | EF3132 |             | 1.5  | hypothetical protein                                     | 8.50E-02 |
| O994_RS14160 | EF3326 |             | 4.7  | hypothetical protein                                     | 1.40E-58 |
| O994_RS12990 | EF0261 |             | -2.5 | hypothetical protein                                     | 2.30E-15 |
| O994_RS12650 | EF0369 |             | -1.8 | HAD superfamily hydrolase                                | 1.70E-03 |
| O994_RS12205 | EF0462 |             | -2.1 | hypothetical protein                                     | 3.00E-03 |
| O994_RS12170 | EF0468 |             | -2.2 | LemA family protein                                      | 3.00E-05 |
| O994_RS12165 | EF0469 |             | -2.3 | hypothetical protein                                     | 1.10E-07 |

|              |        |             |      |                                        |          |
|--------------|--------|-------------|------|----------------------------------------|----------|
| O994_RS02605 | EF0764 |             | -3.8 | hypothetical protein                   | 9.00E-09 |
| O994_RS03010 | EF0857 |             | -2.8 | hypothetical protein                   | 1.50E-06 |
| O994_RS03245 | EF0906 |             | -1.8 | FUSC family protein                    | 2.50E-02 |
| O994_RS03305 | EF0918 |             | -2.6 | DUF1304 domain-containing protein      | 6.80E-06 |
| O994_RS03475 | EF0953 |             | -3.1 | hypothetical protein                   | 3.70E-10 |
| O994_RS03945 | EF1047 |             | -1.9 | DUF177 domain-containing protein       | 3.00E-05 |
| O994_RS04510 | EF1145 |             | -2.2 | DUF1934 domain-containing protein      | 2.80E-06 |
| O994_RS04615 | EF1166 |             | -2.0 | YitT family protein                    | 2.10E-04 |
| O994_RS04985 | EF1241 |             | -3.0 | DUF5067 domain-containing protein      | 3.30E-08 |
| O994_RS05005 | EF1246 |             | -1.8 | DUF441 domain-containing protein       | 4.50E-02 |
| O994_RS05015 | EF1248 |             | -2.0 | hypothetical protein                   | 2.10E-06 |
| O994_RS05095 | EF1265 |             | -4.7 | RNA binding protein                    | 3.10E-52 |
| O994_RS05260 | EF1298 |             | -1.8 | DUF1048 domain-containing protein      | 8.00E-03 |
| O994_RS05395 | EF1315 |             | -1.9 | hypothetical protein                   | 8.60E-03 |
| O994_RS05615 | EF1365 |             | -2.0 | AI-2E family transporter               | 1.40E-04 |
| O994_RS05620 | EF1366 |             | -2.2 | hypothetical protein                   | 6.00E-06 |
| O994_RS05850 | EF1412 |             | -2.1 | hypothetical protein                   | 6.40E-04 |
| O994_RS05885 | EF1419 |             | -1.8 | hypothetical protein                   | 3.90E-03 |
| O994_RS05890 | EF1420 |             | -2.0 | hypothetical protein                   | 3.30E-05 |
| O994_RS05895 | EF1421 |             | -2.7 | ImmA/IrrE family metallo-endopeptidase | 4.10E-11 |
| O994_RS06500 | EF1536 |             | -2.1 | $\alpha/\beta$ hydrolase               | 4.20E-05 |
| O994_RS06530 | EF1542 |             | -2.2 | hypothetical protein                   | 2.30E-04 |
| O994_RS06845 | EF1609 |             | -2.2 | DUF2179 domain-containing protein      | 9.80E-04 |
| O994_RS06900 | EF1620 |             | -3.4 | hypothetical protein                   | 3.80E-09 |
| O994_RS07415 | EF1730 |             | -1.8 | EbsC protein                           | 3.10E-03 |
| O994_RS07435 | EF1734 |             | -3.2 | YneF family protein                    | 2.80E-15 |
| O994_RS07620 | EF1771 |             | -1.8 | yigZ family protein                    | 6.50E-03 |
| O994_RS07625 | EF1772 |             | -1.8 | DUF2829 domain-containing protein      | 4.70E-02 |
| O994_RS08200 | EF1916 | <i>engB</i> | -3.2 | GTP-binding protein                    | 3.10E-13 |
| O994_RS08925 | EF2065 |             | -4.2 | DUF1033 family protein                 | 2.30E-15 |
| O994_RS09340 | EF2211 |             | -2.1 | yxeA family protein                    | 4.00E-04 |

|              |        |  |      |                                             |          |
|--------------|--------|--|------|---------------------------------------------|----------|
| O994_RS09345 | EF2212 |  | -1.8 | nucleoid-associated protein                 | 4.30E-03 |
| O994_RS09180 | EF2492 |  | -2.0 | glycosyl transferase group 2 family protein | 1.20E-05 |
| O994_RS10345 | EF2499 |  | -2.8 | hypothetical protein                        | 2.00E-12 |
| O994_RS10680 | EF2606 |  | -3.2 | DUF1146 domain-containing protein           | 4.90E-14 |
| O994_RS11775 | EF2893 |  | -2.6 | hypothetical protein                        | 5.50E-08 |
| O994_RS01260 | EF3018 |  | -2.2 | hypothetical protein                        | 5.10E-06 |
| O994_RS01020 | EF3067 |  | -2.1 | HAD superfamily hydrolase                   | 3.60E-05 |
| O994_RS00975 | EF3078 |  | -1.9 | DUF1054 domain-containing protein           | 1.00E-02 |
| O994_RS00970 | EF3079 |  | -1.8 | GNAT family <i>N</i> -acetyltransferase     | 1.00E-02 |
| O994_RS00915 | EF3091 |  | -1.8 | YitT family protein                         | 1.20E-02 |
| O994_RS00670 | EF3146 |  | -3.2 | hypothetical protein                        | 3.30E-14 |
| O994_RS00610 | EF3160 |  | -2.7 | hypothetical protein                        | 3.40E-06 |
| O994_RS00535 | EF3176 |  | -3.9 | YccF domain-containing protein              | 8.60E-11 |
| O994_RS00530 | EF3177 |  | -1.9 | hypothetical protein                        | 7.00E-03 |
| O994_RS00240 | EF3247 |  | -2.1 | putative holin-like toxin                   | 3.60E-03 |
| O994_RS00190 | EF3259 |  | -1.6 | hypothetical protein                        | 3.30E-02 |
| O994_RS14310 | EF3295 |  | -1.6 | DUF1129 domain-containing protein           | 3.30E-03 |
| O994_RS14300 | EF3297 |  | -2.4 | DUF951 domain-containing protein            | 1.30E-08 |

### **Replication and repair**

|              |        |              |      |                                   |          |
|--------------|--------|--------------|------|-----------------------------------|----------|
| O994_RS12825 | EF0278 | <i>tag-1</i> | 2.7  | DNA-3-methyladenine glycosylase   | 4.90E-09 |
| O994_RS03575 | EF0972 |              | 1.7  | DNA repair exonuclease            | 3.30E-02 |
| O994_RS08485 | EF1979 |              | 1.7  | recombination factor protein      | 3.30E-03 |
| O994_RS14085 | EF0008 | <i>ssb-1</i> | -1.5 | Single-strand binding protein     | 2.50E-02 |
| O994_RS13810 | EF0066 | <i>ruvA</i>  | -2.0 | Holliday junction DNA helicase    | 2.90E-03 |
| O994_RS04595 | EF1162 |              | -1.5 | helicase                          | 4.10E-02 |
| O994_RS05415 | EF1319 |              | -1.6 | DNA/RNA non-specific endonuclease | 8.30E-02 |
| O994_RS06460 | EF1527 | <i>obgE</i>  | -2.5 | GTPase                            | 2.60E-10 |
| O994_RS06875 | EF1615 | <i>parE</i>  | -1.5 | DNA topoisomerase IV subunit B    | 7.40E-02 |
| O994_RS07030 | EF1650 | <i>topA</i>  | -2.1 | DNA topoisomerase I               | 1.10E-05 |
| O994_RS07040 | EF1652 |              | -2.3 | DNA-protecting protein            | 3.30E-04 |

|              |        |             |      |                               |          |
|--------------|--------|-------------|------|-------------------------------|----------|
| O994_RS07045 | EF1653 | <i>rnhB</i> | -3.0 | ribonuclease HII              | 5.00E-12 |
| O994_RS10935 | EF2663 |             | -1.5 | recombinase D                 | 7.00E-02 |
| O994_RS01015 | EF3068 |             | -2.5 | DNA alkylation repair protein | 6.60E-08 |

### **Signal transduction**

|              |        |             |     |                                                          |          |
|--------------|--------|-------------|-----|----------------------------------------------------------|----------|
| O994_RS04810 | EF1206 |             | 3.6 | malate dehydrogenase, decarboxylating                    | 2.10E-17 |
| O994_RS04815 | EF1207 | <i>maeP</i> | 4.9 | CCS family citrate carrier protein                       | 2.30E-44 |
| O994_RS01215 | EF3027 | <i>htrA</i> | 1.9 | serine protease                                          | 1.90E-06 |
| O994_RS00455 | EF3193 | <i>lrgB</i> | 6.0 | antiholin-like protein                                   | 2.70E-88 |
| O994_RS00450 | EF3194 | <i>lrgA</i> | 6.7 | murein hydrolase regulator                               | 2.20E-92 |
| O994_RS14335 | EF3289 | <i>croR</i> | 4.5 | DNA-binding response regulator                           | 5.80E-45 |
| O994_RS14330 | EF3290 | <i>croS</i> | 4.7 | sensor histidine kinase                                  | 9.00E-50 |
| O994_RS14200 | EF3318 | <i>citX</i> | 3.3 | 2-(5"-triphosphoribosyl)-3'-dephosphocoenzyme-A synthase | 3.90E-18 |
| O994_RS14195 | EF3319 | <i>citF</i> | 3.7 | citrate lyase subunit $\alpha$                           | 1.30E-21 |
| O994_RS14190 | EF3320 | <i>citE</i> | 3.8 | citrate lyase subunit $\beta$                            | 4.60E-07 |
| O994_RS14185 | EF3321 | <i>citD</i> | 4.1 | citrate lyase subunit $\gamma$                           | 4.60E-30 |
| O994_RS14180 | EF3322 | <i>citC</i> | 4.2 | [citrate (pro-3S)-lyase] ligase                          | 1.60E-43 |

|              |        |             |      |                                       |          |
|--------------|--------|-------------|------|---------------------------------------|----------|
| O994_RS03005 | EF0856 |             | -2.3 | aldo/keto reductase                   | 2.40E-05 |
| O994_RS03960 | EF1050 |             | -2.2 | DNA-binding response regulator        | 1.20E-06 |
| O994_RS03965 | EF1051 |             | -2.2 | sensor histidine kinase               | 2.60E-05 |
| O994_RS08855 | EF2050 |             | -2.6 | ABC transporter ATP-binding protein   | 2.40E-07 |
| O994_RS09095 | EF2159 | <i>glnA</i> | -2.3 | glutamine synthetase, type I          | 4.80E-13 |
| O994_RS09375 | EF2218 |             | -1.6 | AraC family transcriptional regulator | 5.30E-02 |

### **Transcription**

|              |        |             |      |                                              |          |
|--------------|--------|-------------|------|----------------------------------------------|----------|
| O994_RS04515 | EF1146 | <i>rpoE</i> | -1.8 | DNA-directed RNA polymerase subunit $\delta$ | 1.50E-04 |
| O994_RS11875 | EF2914 | <i>greA</i> | -2.8 | transcription elongation factor              | 2.60E-13 |
| O994_RS00760 | EF3126 | <i>rpoZ</i> | -2.6 | DNA-directed RNA polymerase subunit $\omega$ | 8.20E-08 |

### **Transcriptional regulators**

|              |        |  |     |                                                        |          |
|--------------|--------|--|-----|--------------------------------------------------------|----------|
| O994_RS13630 | EF0107 |  | 7.4 | Crp/Fnr family transcriptional regulator               | 2.90E-29 |
| O994_RS02070 | EF0663 |  | 2.3 | YebC/PmpR family DNA-binding transcriptional regulator | 4.00E-13 |
| O994_RS02450 | EF0731 |  | 1.9 | LuxR family transcriptional regulator                  | 3.50E-04 |

|              |        |             |      |                                                       |          |
|--------------|--------|-------------|------|-------------------------------------------------------|----------|
| O994_RS02860 | EF0828 |             | 2.3  | transcription antiterminator                          | 6.10E-06 |
| O994_RS03125 | EF0881 | <i>nrdR</i> | 1.5  | transcriptional regulator                             | 1.50E-02 |
| O994_RS04565 | EF1156 |             | 2.1  | GntR family transcriptional regulator                 | 1.90E-05 |
| O994_RS04820 | EF1209 |             | 2.5  | sensory box histidine kinase                          | 1.00E-10 |
| O994_RS04825 | EF1210 |             | 2.4  | response regulator                                    | 1.80E-06 |
| O994_RS05570 | EF1357 |             | 2.2  | AraC family transcriptional regulator                 | 3.40E-05 |
| O994_RS06760 | EF1591 |             | 2.4  | AraC family transcriptional regulator                 | 4.40E-10 |
| O994_RS07060 | EF1656 |             | 4.7  | LysR family transcriptional regulator                 | 1.40E-32 |
| O994_RS07315 | EF1709 |             | 2.0  | GntR family transcriptional regulator                 | 4.70E-05 |
| O994_RS01690 | EF1839 | <i>lacR</i> | 1.9  | lactose phosphotransferase system repressor           | 1.00E-04 |
| O994_RS08375 | EF1955 |             | 1.9  | $\sigma$ -54 dependent DNA-binding response regulator | 8.70E-05 |
| O994_RS12030 | EF2966 |             | 3.8  | BglG family transcriptional antiterminator            | 1.30E-31 |
| O994_RS00355 | EF3216 |             | 2.3  | $\sigma$ -54-interacting transcriptional regulator    | 1.00E-08 |
| O994_RS14250 | EF3308 | <i>srlR</i> | 4.2  | transcriptional regulator                             | 2.20E-16 |
| O994_RS14245 | EF3309 | <i>srlM</i> | 5.2  | transcriptional activator                             | 4.60E-40 |
| O994_RS14150 | EF3328 | <i>citO</i> | 3.3  | GntR family transcriptional regulator                 | 2.80E-25 |
| O994_RS13780 | EF0074 |             | -4.1 | Crp/Fnr family transcriptional regulator              | 3.80E-13 |
| O994_RS12485 | EF0403 |             | -1.9 | MarR family transcriptional regulator                 | 1.10E-02 |
| O994_RS12400 | EF0421 |             | -3.6 | MerR family transcriptional regulator                 | 1.60E-09 |
| O994_RS12395 | EF0422 |             | -3.1 | IclR family transcriptional regulator                 | 1.10E-10 |
| O994_RS12190 | EF0465 |             | -1.5 | transcriptional regulator                             | 4.40E-02 |
| O994_RS03735 | EF1005 |             | -1.9 | metal-dependent transcriptional regulator             | 7.10E-04 |
| O994_RS05255 | EF1297 |             | -1.9 | PadR family transcriptional regulator                 | 7.00E-03 |
| O994_RS05500 | EF1342 |             | -2.8 | MarR family transcriptional regulator                 | 7.70E-07 |
| O994_RS05900 | EF1422 |             | -2.6 | Cro/CI family transcriptional regulator               | 1.00E-06 |
| O994_RS06450 | EF1525 |             | -1.6 | FUR family transcriptional regulator                  | 2.60E-02 |
| O994_RS06660 | EF1569 | <i>psr</i>  | -1.9 | transcriptional regulator                             | 2.30E-04 |
| O994_RS07485 | EF1741 | <i>ccpA</i> | -2.5 | catabolite control protein A                          | 3.50E-13 |
| O994_RS07955 | EF1864 |             | -3.3 | DNA-binding response regulator                        | 4.30E-10 |
| O994_RS09100 | EF2160 | <i>glnR</i> | -2.4 | regulatory protein                                    | 2.30E-12 |

|              |        |             |      |                                                     |          |
|--------------|--------|-------------|------|-----------------------------------------------------|----------|
| O994_RS10010 | EF2428 |             | -1.5 | PadR family transcriptional regulator               | 8.50E-02 |
| O994_RS10895 | EF2653 |             | -2.6 | Cro/CI family transcriptional regulator             | 1.60E-09 |
| O994_RS11245 | EF2729 | <i>nusG</i> | -3.0 | transcription antitermination protein               | 2.50E-15 |
| O994_RS11460 | EF2774 |             | -1.9 | helix-turn-helix transcriptional regulator          | 5.80E-03 |
| O994_RS11720 | EF2886 |             | -1.8 | MarR family transcriptional regulator               | 1.80E-05 |
| O994_RS12010 | EF2962 |             | -1.8 | LacI family sugar-binding transcriptional regulator | 1.30E-02 |

### **Translation**

|              |        |               |      |                                                         |          |
|--------------|--------|---------------|------|---------------------------------------------------------|----------|
| O994_RS13665 | EF0100 | <i>serS-1</i> | 2.4  | seryl-tRNA synthetase                                   | 2.10E-12 |
| O994_RS02825 | EF0820 | <i>rplY</i>   | 3.4  | 50S ribosomal protein L25                               | 5.90E-34 |
| O994_RS02915 | EF0838 |               | 2.0  | DgaE family pyridoxal phosphate-dependent ammonia lyase | 3.90E-03 |
| O994_RS07595 | EF1764 | <i>yfiA</i>   | 2.1  | ribosomal subunit interface protein                     | 1.40E-08 |
| O994_RS14090 | EF0007 | <i>rpsF</i>   | -1.6 | 30S ribosomal protein S6                                | 1.50E-02 |
| O994_RS12985 | EF0262 |               | -2.9 | RNA binding protein                                     | 1.10E-18 |
| O994_RS12960 | EF0267 |               | -2.5 | zinc-binding NifR3 family TIM-barrel protein            | 3.10E-09 |
| O994_RS01920 | EF0633 | <i>tryS-1</i> | -1.5 | tyrosyl-tRNA synthetase                                 | 5.00E+00 |
| O994_RS02155 | EF0679 |               | -2.0 | RluA family pseudouridine synthase                      | 1.50E-03 |
| O994_RS02220 | EF0691 | <i>trmB</i>   | -1.9 | tRNA (guanine-N(7)-)-methyltransferase                  | 2.40E-03 |
| O994_RS02270 | EF0701 | <i>prfc</i>   | -2.9 | peptide chain release factor 3                          | 2.30E-13 |
| O994_RS02830 | EF0821 |               | -2.3 | 16S rRNA pseudouridine(516) synthase                    | 2.80E-06 |
| O994_RS03065 | EF0868 | <i>queA</i>   | -1.9 | S-adenosylmethionine--tRNA ribosyltransferase-isomerase | 1.30E-05 |
| O994_RS03200 | EF0896 | <i>tgt</i>    | -3.3 | queuine tRNA-ribosyltransferase                         | 7.30E-24 |
| O994_RS03285 | EF0914 | <i>infC</i>   | -3.6 | translation initiation factor IF-3                      | 1.20E-32 |
| O994_RS03290 | EF0915 | <i>rpmI</i>   | -2.7 | 50S ribosomal protein L35                               | 3.40E-14 |
| O994_RS03295 | EF0916 | <i>rplT</i>   | -2.2 | 50S ribosomal protein L20                               | 1.40E-08 |
| O994_RS03555 | EF0968 | <i>rplU</i>   | -1.8 | 50S ribosomal protein L21                               | 4.20E-04 |
| O994_RS03560 | EF0969 |               | -1.7 | ribosomal-processing cysteine protease                  | 7.30E-04 |
| O994_RS03565 | EF0970 | <i>rpmA</i>   | -1.5 | 50S ribosomal protein L27                               | 1.00E-02 |
| O994_RS03950 | EF1048 | <i>rpmF-3</i> | -1.6 | 50S ribosomal protein L32                               | 1.80E-02 |
| O994_RS06520 | EF1540 |               | -2.1 | rRNA pseudouridine synthase                             | 1.10E-06 |
| O994_RS07465 | EF1739 | <i>tryS-2</i> | -1.9 | tyrosyl-tRNA synthetase                                 | 4.30E-05 |

|              |        |             |      |                                                      |          |
|--------------|--------|-------------|------|------------------------------------------------------|----------|
| O994_RS08120 | EF1898 | <i>rplS</i> | -1.5 | 50S ribosomal protein L19                            | 5.80E-02 |
| O994_RS08125 | EF1899 | <i>trmD</i> | -2.0 | tRNA (guanine-N1)-methyltransferase                  | 1.10E-05 |
| O994_RS08130 | EF1900 | <i>rimM</i> | -2.1 | 16S rRNA processing protein                          | 3.50E-05 |
| O994_RS08845 | EF2048 | <i>rlmN</i> | -3.3 | 23S rRNA (adenine(2503)-C(2))-methyltransferase      | 2.60E-13 |
| O994_RS09875 | EF2398 | <i>rpsB</i> | -1.6 | 30S ribosomal protein S2                             | 4.40E-03 |
| O994_RS09955 | EF2416 | <i>rpsU</i> | -1.5 | 30S ribosomal protein S21                            | 2.60E-02 |
| O994_RS10085 | EF2443 | <i>rpsT</i> | -1.9 | 30S ribosomal protein S20                            | 8.30E-05 |
| O994_RS10220 | EF2473 | <i>rimI</i> | -1.7 | ribosomal-protein-alanine acetyltransferase          | 2.20E-02 |
| O994_RS10225 | EF2474 | <i>rimI</i> | -1.7 | ribosomal-protein-alanine acetyltransferase          | 9.20E-03 |
| O994_RS10230 | EF2475 | <i>tsaB</i> | -1.6 | tRNA (adenosine(37)-N6)-threonylcarbamoyltransferase | 6.00E-02 |
| O994_RS10945 | EF2665 | <i>trmL</i> | -2.2 | RNA methyltransferase                                | 1.90E-07 |
| O994_RS11010 | EF2679 | <i>trpS</i> | -2.5 | tryptophanyl-tRNA synthetase                         | 1.30E-08 |
| O994_RS11255 | EF2731 | <i>rpmG</i> | -3.9 | 50S ribosomal protein L33                            | 1.80E-16 |
| O994_RS11575 | EF2856 | <i>rpmG</i> | -2.5 | 50S ribosomal protein L33                            | 3.40E-11 |
| O994_RS01030 | EF3065 | <i>rpsO</i> | -3.1 | 30S ribosomal protein S15                            | 1.70E-15 |
| O994_RS01005 | EF3070 | <i>rpsD</i> | -3.0 | 30S ribosomal protein S4                             | 1.10E-17 |
| O994_RS00810 | EF3116 | <i>rpmB</i> | -2.1 | 50S ribosomal protein L28                            | 7.80E-04 |
| O994_RS00390 | EF3207 |             | -3.3 | dihydrouridine synthase                              | 2.90E-16 |
| O994_RS00320 | EF3230 | <i>rpsI</i> | -1.6 | 30S ribosomal protein S9                             | 1.50E-03 |
| O994_RS00315 | EF3231 | <i>rplM</i> | -2.0 | 50S ribosomal protein L13                            | 3.10E-07 |
| O994_RS14285 | EF3300 | <i>gidB</i> | -3.9 | 16S rRNA methyltransferase                           | 3.30E-21 |
| O994_RS14125 | EF3333 | <i>rpmH</i> | -2.8 | 50S ribosomal protein L34                            | 1.50E-09 |

---

**Unclassified genetic information processing**

|              |        |  |      |                    |          |
|--------------|--------|--|------|--------------------|----------|
| O994_RS05625 | EF1367 |  | -1.8 | cold-shock protein | 2.60E-02 |
|--------------|--------|--|------|--------------------|----------|

---

**Xenobiotics biodegradation and metabolism**

|              |        |  |      |                           |          |
|--------------|--------|--|------|---------------------------|----------|
| O994_RS02835 | EF0822 |  | -2.0 | HAD superfamily hydrolase | 8.20E-04 |
| O994_RS10615 | EF2591 |  | -2.0 | glyoxalase                | 1.50E-06 |

---

**JH2-2 Specific Genes**

|              |  |  |     |                      |          |
|--------------|--|--|-----|----------------------|----------|
| O994_RS01325 |  |  | 1.9 | hypothetical protein | 8.90E-03 |
| O994_RS01355 |  |  | 3.4 | hypothetical protein | 8.80E-14 |
| O994_RS02075 |  |  | 4.1 | hypothetical protein | 6.60E-36 |

|              |             |      |                                                  |          |
|--------------|-------------|------|--------------------------------------------------|----------|
| O994_RS03970 | <i>lacC</i> | 3.0  | tagatose-6-phosphate kinase                      | 9.20E-13 |
| O994_RS05055 |             | 3.4  | hypothetical protein                             | 2.20E-33 |
| O994_RS05240 |             | 5.6  | PTS sugar transporter subunit IIB                | 5.20E-28 |
| O994_RS06725 |             | 5.5  | PTS fructose transporter subunit IIA             | 4.40E-21 |
| O994_RS08875 |             | 1.7  | hypothetical protein                             | 1.80E-03 |
| O994_RS11760 |             | 2.2  | type I restriction endonuclease subunit R        | 9.70E-12 |
| O994_RS14595 |             | 3.7  | hypothetical protein                             | 2.40E-27 |
| O994_RS14700 |             | 1.9  | hypothetical protein                             | 1.70E-03 |
| O994_RS14860 |             | 2.1  | hypothetical protein                             | 6.60E-06 |
| O994_RS14955 |             | 3.4  | hypothetical protein                             | 2.30E-32 |
| O994_RS15000 |             | 2.0  | hypothetical protein                             | 8.00E-04 |
| O994_RS01705 |             | -2.4 | tRNA-Ser                                         | 2.10E-04 |
| O994_RS01800 |             | -2.3 | tRNA-Ala                                         | 9.00E-04 |
| O994_RS01805 |             | -1.6 | 16S ribosomal RNA                                | 4.50E-02 |
| O994_RS03080 |             | -2.9 | $\alpha/\beta$ hydrolase                         | 5.00E-07 |
| O994_RS03850 |             | -1.5 | type I restriction-modification system subunit M | 1.70E-02 |
| O994_RS04000 |             | -4.4 | hypothetical protein                             | 5.50E-62 |
| O994_RS08365 |             | -2.7 | tRNA-Ala                                         | 8.40E-15 |
| O994_RS08370 |             | -2.8 | tRNA-Ala                                         | 9.80E-15 |
| O994_RS09570 |             | -1.9 | hypothetical protein                             | 1.80E-02 |
| O994_RS11420 |             | -3.1 | MFS transporter                                  | 3.70E-08 |
| O994_RS11450 |             | -2.4 | tRNA-Met                                         | 1.70E-04 |
| O994_RS12890 |             | -2.6 | hypothetical protein                             | 2.00E-10 |
| O994_RS12895 |             | -2.8 | hypothetical protein                             | 5.70E-06 |
| O994_RS12900 |             | -2.6 | IS30-like element IS6770 family transposase      | 1.60E-07 |
| O994_RS14175 | <i>truB</i> | -3.7 | tRNA pseudouridine(55) synthase                  | 5.20E-09 |
| O994_RS14340 |             | -1.6 | NAD(P)/FAD-dependent oxidoreductase              | 5.80E-03 |
| O994_RS14445 |             | -2.0 | hypothetical protein                             | 1.30E-06 |
| O994_RS14525 |             | -2.1 | hypothetical protein                             | 9.50E-04 |
| O994_RS14530 |             | -2.2 | hypothetical protein                             | 5.00E-05 |



|              |             |      |                            |          |
|--------------|-------------|------|----------------------------|----------|
| O994_RS14575 |             | -4.6 | hypothetical protein       | 2.10E-67 |
| O994_RS14615 |             | -1.8 | hypothetical protein       | 4.30E-02 |
| O994_RS14660 |             | -3.7 | MFS transporter            | 1.40E-12 |
| O994_RS14750 |             | -1.7 | hypothetical protein       | 6.30E-03 |
| O994_RS14820 |             | -4.7 | hypothetical protein       | 9.80E-15 |
| O994_RS14865 |             | -1.8 | hypothetical protein       | 6.30E-04 |
| O994_RS14970 |             | -2.1 | hypothetical protein       | 2.70E-09 |
| O994_RS14975 |             | -2.5 | recombinase family protein | 3.40E-05 |
| O994_RS15030 | <i>recR</i> | -3.1 | recombination protein      | 2.60E-08 |

---

Table S2. Genes differentially expressed in *E. faecalis* wild-type versus  $\Delta$ *croRS* in the presence of TXB.

| JH2-2 Locus Tag          | V583 Gene | Gene Name     | F/C (log <sub>2</sub> ) | Gene Function                                                    | P <sub>adj</sub> |
|--------------------------|-----------|---------------|-------------------------|------------------------------------------------------------------|------------------|
| <b><u>Amino acid</u></b> |           |               |                         |                                                                  |                  |
| O994_RS13945             | EF0037    | <i>proA</i>   | 2.5                     | $\gamma$ -glutamyl phosphate reductase                           | 5.60E-17         |
| O994_RS13940             | EF0038    | <i>proB</i>   | 3.2                     | glutamate-5-kinase                                               | 6.60E-31         |
| O994_RS13645             | EF0104    | <i>arcA</i>   | 4.8                     | arginine deaminase                                               | 2.20E-17         |
| O994_RS13640             | EF0105    | <i>argF-1</i> | 5.0                     | ornithine carbamoyltransferase                                   | 5.90E-20         |
| O994_RS13635             | EF0106    | <i>arcC-1</i> | 2.6                     | carbamate kinase I                                               | 1.20E-04         |
| O994_RS12655             | EF0368    |               | 2.6                     | aspartate kinase                                                 | 3.00E-09         |
| O994_RS02475             | EF0737    |               | 1.4                     | amidase                                                          | 8.20E-02         |
| O994_RS02700             | EF0784    | <i>metK</i>   | 2.0                     | S-adenosylmethionine synthetase                                  | 2.60E-06         |
| O994_RS03895             | EF1037    | <i>aspD</i>   | 2.3                     | aspartate aminotransferase                                       | 1.30E-13         |
| O994_RS04455             | EF1133    | <i>dapD</i>   | 4.3                     | 2,3,4,5-tetrahydropyridine-2,6-dicarboxylate N-acetyltransferase | 2.10E-115        |
| O994_RS04460             | EF1134    |               | 3.7                     | M20/M25/M40 family peptidase                                     | 6.30E-61         |
| O994_RS04695             | EF1183    | <i>asd</i>    | 1.8                     | aspartate-semialdehyde dehydrogenase                             | 4.50E-04         |
| O994_RS04700             | EF1184    | <i>dapA</i>   | 1.7                     | 4-hydroxy-tetrahydrodipicolinate synthase                        | 2.60E-05         |
| O994_RS05390             | EF1314    | <i>alaT</i>   | 4.9                     | aminotransferase                                                 | 2.10E-115        |
| O994_RS05865             | EF1415    | <i>gdhA</i>   | 4.1                     | glutamate dehydrogenase                                          | 9.50E-55         |
| O994_RS06620             | EF1561    | <i>aroE</i>   | 1.6                     | shikimate 5-dehydrogenase                                        | 4.40E-02         |
| O994_RS06625             | EF1562    |               | 1.8                     | 3-deoxy-7-phosphoheptulonate synthase                            | 3.20E-04         |
| O994_RS06630             | EF1563    | <i>aroB</i>   | 2.1                     | 3-dehydroquininate synthase                                      | 8.30E-06         |
| O994_RS06635             | EF1564    | <i>aroC</i>   | 2.4                     | chorismate synthase                                              | 4.40E-10         |
| O994_RS06640             | EF1565    |               | 1.7                     | prephenate dehydrogenase                                         | 1.30E-02         |
| O994_RS06875             | EF1618    | <i>eutH</i>   | 2.5                     | ethanolamine utilization protein                                 | 5.90E-11         |
| O994_RS06975             | EF1638    | <i>pduV</i>   | 2.4                     | propanediol utilization protein                                  | 4.90E-03         |
| O994_RS07300             | EF1706    |               | 1.7                     | aromatic amino acid aminotransferase                             | 2.10E-04         |
| O994_RS07490             | EF1743    | <i>pepQ-2</i> | 1.5                     | proline dipeptidase                                              | 6.00E-02         |
| O994_RS09355             | EF2214    |               | 4.4                     | glyoxylase                                                       | 1.10E-55         |
| O994_RS09970             | EF2420    | <i>thrB</i>   | 1.4                     | homoserine kinase                                                | 7.80E-02         |
| O994_RS09975             | EF2421    | <i>thrC</i>   | 2.6                     | threonine synthase                                               | 1.70E-18         |

|                                       |        |               |      |                                                              |          |
|---------------------------------------|--------|---------------|------|--------------------------------------------------------------|----------|
| O994_RS09980                          | EF2422 | <i>hom</i>    | 2.6  | homoserine dehydrogenase                                     | 1.00E-18 |
| O994_RS09990                          | EF2424 | <i>proC</i>   | 2.3  | pyrroline-5-carboxylate reductase                            | 2.80E-11 |
| O994_RS11210                          | EF2721 | <i>sdhb-2</i> | 3.9  | L-serine dehydratase, iron-sulfur dependent subunit $\beta$  | 2.30E-44 |
| O994_RS11215                          | EF2722 | <i>sdha-2</i> | 3.1  | iron-sulfur-dependent L-serine dehydratase subunit $\alpha$  | 1.20E-19 |
| O994_RS03510                          | EF0961 | <i>proC</i>   | -2.3 | pyrroline-5-carboxylate reductase                            | 3.60E-05 |
| O994_RS04600                          | EF1163 |               | -1.9 | L-asparaginase                                               | 1.40E-05 |
| O994_RS05990                          | EF2340 | <i>dcm</i>    | -1.9 | C-5 cytosine-specific DNA methylase                          | 4.20E-02 |
| <b><u>Autolysis</u></b>               |        |               |      |                                                              |          |
| O994_RS13030                          | EF0252 |               | 2.6  | <i>N</i> -acetylmuramoyl-L-alanine amidase                   | 7.50E-17 |
| O994_RS12300                          | EF0443 |               | 3.8  | LysM domain-containing protein                               | 2.80E-31 |
| O994_RS02775                          | EF0799 |               | 1.8  | autolysin                                                    | 5.90E-04 |
| O994_RS06420                          | EF1518 |               | 5.1  | soluble lytic murein transglycosylase                        | 5.30E-88 |
| <b><u>Carbohydrate metabolism</u></b> |        |               |      |                                                              |          |
| O994_RS13020                          | EF0255 | <i>ldh-I</i>  | 2.2  | L-lactate dehydrogenase                                      | 2.40E-09 |
| O994_RS03215                          | EF0900 | <i>adhE</i>   | 2.5  | bifunctional acetaldehyde-CoA/alcohol dehydrogenase          | 1.20E-06 |
| O994_RS03490                          | EF0956 | <i>pgmB</i>   | 1.5  | $\beta$ -phosphoglucomutase                                  | 2.10E-02 |
| O994_RS03495                          | EF0957 |               | 2.3  | maltose phosphorylase                                        | 1.30E-09 |
| O994_RS04160                          | EF1071 | <i>galT</i>   | 1.7  | galactose-1-phosphate uridylyltransferase                    | 6.80E-03 |
| O994_RS05535                          | EF1349 |               | 1.9  | $\alpha$ -glucosidase                                        | 1.20E-03 |
| O994_RS06865                          | EF1613 | <i>pflB</i>   | 4.9  | formate acetyltransferase                                    | 7.80E-07 |
| O994_RS07000                          | EF1644 | <i>lacX</i>   | 2.5  | aldose-1-epimerase                                           | 6.40E-17 |
| O994_RS09090                          | EF2158 | <i>nifJ</i>   | 1.8  | pyruvate ferredoxin/flavodoxin oxidoreductase family protein | 4.10E-03 |
| O994_RS09995                          | EF2425 |               | 2.6  | phospho-sugar mutase                                         | 2.90E-27 |
| O994_RS10030                          | EF2432 |               | 1.8  | metallo- $\beta$ -lactamase superfamily protein              | 1.10E-06 |
| O994_RS10155                          | EF2456 | <i>pycA</i>   | 1.4  | pyruvate carboxylase                                         | 7.80E-02 |
| O994_RS10350                          | EF2500 |               | 3.9  | GcvH family protein                                          | 1.40E-38 |
| O994_RS10605                          | EF2589 | <i>manA</i>   | 1.7  | mannose-6-phosphate isomerase                                | 5.20E-03 |
| O994_RS10940                          | EF2664 |               | 1.9  | histidine phosphatase family protein                         | 3.70E-03 |
| O994_RS11675                          | EF2877 | <i>accC</i>   | 1.4  | acetyl-CoA carboxylase biotin carboxylase subunit            | 4.90E-02 |
| O994_RS11885                          | EF2916 |               | 1.9  | HAD family hydrolase                                         | 1.00E-04 |

|                                                  |        |               |      |                                                        |          |
|--------------------------------------------------|--------|---------------|------|--------------------------------------------------------|----------|
| O994_RS00300                                     | EF3235 |               | 3.2  | gluconokinase                                          | 3.30E-37 |
| O994_RS02385                                     | EF0718 | <i>fruk-2</i> | -2.9 | 1-phosphofructokinase                                  | 3.10E-11 |
| O994_RS06325                                     | EF1503 | <i>fbp</i>    | -1.5 | fructose-1,6-bisphosphatase                            | 9.60E-02 |
| O994_RS06830                                     | EF1606 |               | -2.2 | glycosyl hydrolase                                     | 4.70E-05 |
| O994_RS14270                                     | EF3304 |               | -2.2 | fructose-6-phosphate aldolase                          | 3.10E-06 |
| <b><u>Cellular community</u></b>                 |        |               |      |                                                        |          |
| O994_RS00880                                     | EF3106 | <i>opp2A</i>  | 3.0  | oligopeptide ABC transporter substrate-binding protein | 3.90E-30 |
| O994_RS00875                                     | EF3107 | <i>opp2C</i>  | 3.7  | oligopeptide ABC transporter permease                  | 5.90E-41 |
| O994_RS00860                                     | EF3110 | <i>opp2D</i>  | 3.5  | oligopeptide ABC transporter ATP-binding protein       | 3.30E-26 |
| <b><u>Drug resistance: antimicrobial</u></b>     |        |               |      |                                                        |          |
| O994_RS02970                                     | EF0849 | <i>alr</i>    | -2.6 | alanine racemase                                       | 1.30E-17 |
| O994_RS06490                                     | EF1534 |               | -3.4 | cyclophilin type peptidyl-prolyl cis-trans isomerase   | 2.40E-29 |
| <b><u>Energy Metabolism</u></b>                  |        |               |      |                                                        |          |
| O994_RS06855                                     | EF1611 | <i>ppaC</i>   | 2.0  | manganese-dependent inorganic pyrophosphatase          | 2.30E-07 |
| O994_RS08875                                     | EF2055 |               | -2.3 | pyridine nucleotide-disulfide family oxidoreductase    | 2.50E-12 |
| <b><u>Folding, sorting and degradation</u></b>   |        |               |      |                                                        |          |
| O994_RS02185                                     | EF0685 | <i>prsA</i>   | 1.4  | peptidyl-prolyl cis-trans isomerase                    | 6.20E-02 |
| O994_RS03205                                     | EF0897 | <i>yajC</i>   | 1.7  | preprotein translocase subunit                         | 3.00E-03 |
| O994_RS07010                                     | EF1646 | <i>hslU</i>   | 3.1  | heat shock protein                                     | 3.30E-30 |
| O994_RS07015                                     | EF1647 | <i>hslV</i>   | 2.6  | heat shock protein                                     | 2.60E-15 |
| O994_RS00900                                     | EF3094 | <i>ftsY</i>   | 1.7  | signal recognition particle-docking protein            | 6.30E-04 |
| O994_RS05675                                     | EF1377 |               | -1.8 | DEAD/DEAH box helicase                                 | 7.10E-05 |
| O994_RS10750                                     | EF2620 | <i>secG</i>   | -1.7 | preprotein translocase subunit                         | 4.50E-03 |
| <b><u>Glycan biosynthesis and metabolism</u></b> |        |               |      |                                                        |          |
| O994_RS02160                                     | EF0680 |               | 2.7  | penicillin-binding protein 2A                          | 1.50E-13 |
| O994_RS02520                                     | EF0746 | <i>pbp(6)</i> | 5.4  | penicillin binding protein                             | 1.50E-77 |
| O994_RS03665                                     | EF0991 | <i>pbpC</i>   | 2.8  | penicillin-binding protein C                           | 2.00E-22 |

|              |        |                |     |                                                                                              |          |
|--------------|--------|----------------|-----|----------------------------------------------------------------------------------------------|----------|
| O994_RS03670 | EF0992 | <i>mraY</i>    | 2.1 | phospho- <i>N</i> -acetylmuramoyl-pentapeptide-transferase                                   | 1.70E-07 |
| O994_RS03675 | EF0993 | <i>murD</i>    | 1.9 | UDP- <i>N</i> -acetylmuramoyl-L-alanyl-D-glutamate synthetase                                | 5.90E-04 |
| O994_RS03680 | EF0994 | <i>murG</i>    | 2.1 | undecaprenyldiphospho-muramoylpentapeptide $\beta$ - <i>N</i> -acetylglucosaminyltransferase | 1.50E-07 |
| O994_RS04525 | EF1148 | <i>pbp1A</i>   | 2.6 | penicillin-binding protein 1A                                                                | 2.60E-24 |
| O994_RS05270 | EF1300 |                | 2.9 | putative lipid II flippase                                                                   | 5.70E-10 |
| O994_RS06105 | EF1460 |                | 3.0 | LysM peptidoglycan-binding domain-containing protein                                         | 5.10E-08 |
| O994_RS06550 | EF1546 |                | 1.9 | putative teichoic acid transport protein                                                     | 1.20E-08 |
| O994_RS07470 | EF1740 | <i>pbp1B</i>   | 2.2 | penicillin-binding protein 1B                                                                | 2.00E-12 |
| O994_RS07505 | EF1746 | <i>galU</i>    | 2.6 | UTP-glucose-1-phosphate uridylyltransferase                                                  | 8.10E-20 |
| O994_RS09050 | EF2150 |                | 2.1 | FemAB family protein                                                                         | 2.30E-11 |
| O994_RS09150 | EF2170 | <i>epaX</i>    | 2.1 | putative glycosyl transferase family 2                                                       | 7.30E-07 |
| O994_RS09155 | EF2171 | <i>epaW</i>    | 2.8 | dTDP-4-dehydro-6-deoxy-D-glucose                                                             | 3.70E-21 |
| O994_RS09160 | EF2172 | <i>ispD</i>    | 2.9 | 2-C-methyl-D-erythritol 4-phosphate                                                          | 1.40E-20 |
| O994_RS09170 | EF2174 |                | 3.0 | putative L-alanyl-D-glutamate peptidase                                                      | 1.20E-11 |
| O994_RS09190 | EF2178 | <i>epaQ</i>    | 1.5 | EpaQ family protein                                                                          | 9.40E-03 |
| O994_RS09240 | EF2191 | <i>epaH</i>    | 1.4 | dTDP-4-dehydrorhamnose reductase                                                             | 6.20E-02 |
| O994_RS09245 | EF2192 | <i>epaG</i>    | 2.2 | dTDP-glucose 4,6-dehydratase                                                                 | 5.30E-13 |
| O994_RS09250 | EF2193 | <i>epaF</i>    | 2.7 | dTDP-4-dehydrorhamnose 3,5-epimerase                                                         | 7.30E-27 |
| O994_RS09255 | EF2194 | <i>epaE</i>    | 2.6 | glucose-1-phosphate thymidylyltransferase                                                    | 4.00E-22 |
| O994_RS09260 | EF2195 | <i>epaD</i>    | 1.9 | $\alpha$ -1,3-L-rhamnosyltransferase                                                         | 4.50E-06 |
| O994_RS09265 | EF2196 | <i>epaC</i>    | 1.9 | glycosyl transferase family 2                                                                | 7.50E-06 |
| O994_RS09270 | EF2197 | <i>epaB</i>    | 1.9 | putative $\alpha$ -D-GlcNAc-pyrophosphate polyprenol, $\alpha$ -3-L-rhamnosyl transferase    | 2.40E-05 |
| O994_RS10235 | EF2476 | <i>pbp4(5)</i> | 4.2 | penicillin-binding protein 4                                                                 | 2.20E-79 |
| O994_RS10585 | EF2585 | <i>murT</i>    | 3.3 | mur ligase                                                                                   | 1.50E-56 |
| O994_RS10590 | EF2586 | <i>gatD</i>    | 3.0 | glutamine amidotransferase                                                                   | 6.40E-34 |
| O994_RS10920 | EF2658 |                | 2.8 | FemAB family protein                                                                         | 6.00E-25 |
| O994_RS11265 | EF2733 | <i>murB</i>    | 2.7 | UDP- <i>N</i> -acetylenolpyruvoylglucosamine reductase                                       | 3.60E-19 |
| O994_RS11580 | EF2857 | <i>pbp2B</i>   | 4.8 | penicillin-binding protein 2B                                                                | 3.00E-85 |
| O994_RS11595 | EF2860 | <i>pbp</i>     | 2.5 | putative peptidoglycan transpeptidase                                                        | 1.10E-18 |
| O994_RS01055 | EF3060 | <i>sala</i>    | 3.2 | peptidoglycan DL-endopeptidase                                                               | 2.90E-13 |

|                                  |        |               |      |                                                      |          |
|----------------------------------|--------|---------------|------|------------------------------------------------------|----------|
| O994_RS13605                     | EF0114 |               | -2.0 | glycosyl hydrolase                                   | 4.70E-03 |
| O994_RS02085                     | EF0666 |               | -1.5 | glyoxalase                                           | 2.40E-02 |
| O994_RS10285                     | EF2487 | <i>glf</i>    | -1.9 | UDP-galactopyranose mutase                           | 3.40E-03 |
| <b><u>Lipid metabolism</u></b>   |        |               |      |                                                      |          |
| O994_RS12800                     | EF0283 | <i>fabF-1</i> | 1.6  | 3-oxoacyl-ACP synthase                               | 7.90E-03 |
| O994_RS12670                     | EF0365 |               | 3.4  | acyl-ACP thioesterase                                | 3.30E-17 |
| O994_RS05090                     | EF1264 |               | 1.5  | sulfatase                                            | 2.90E-03 |
| O994_RS05585                     | EF1360 | <i>dhaK</i>   | 1.6  | dihydroxyacetone kinase                              | 7.40E-02 |
| O994_RS06665                     | EF1570 |               | 1.6  | DegV family protein                                  | 1.00E-02 |
| O994_RS07510                     | EF1747 | <i>gpsA</i>   | 3.2  | NAD(P)H-dependent glycerol-3-phosphate dehydrogenase | 2.10E-39 |
| O994_RS07815                     | EF1813 |               | 3.4  | lipoteichoic acid synthase                           | 1.30E-15 |
| O994_RS08160                     | EF1907 |               | 1.8  | enoyl-CoA hydratase                                  | 6.50E-08 |
| O994_RS10320                     | EF2494 | <i>cdsA</i>   | 2.9  | phosphatidate cytidyltransferase                     | 1.50E-19 |
| O994_RS11690                     | EF2880 | <i>fabF-2</i> | 1.5  | 3-oxoacyl-ACP synthase                               | 1.60E-03 |
| O994_RS11695                     | EF2881 | <i>fabG</i>   | 1.8  | 3-oxoacyl-[acyl-carrier-protein] reductase           | 1.40E-08 |
| O994_RS11700                     | EF2882 | <i>fabD</i>   | 1.4  | ACP S-malonyltransferase                             | 1.30E-02 |
| O994_RS01770                     | EF0521 |               | -2.0 | choloylglycine hydrolase                             | 1.10E-06 |
| O994_RS06840                     | EF1608 | <i>cls</i>    | -1.8 | cardiolipin synthetase                               | 1.50E-03 |
| <b><u>Membrane transport</u></b> |        |               |      |                                                      |          |
| O994_RS07555                     | EF1756 | <i>pstB</i>   | 1.7  | phosphate ABC transporter ATP-binding protein        | 8.90E-04 |
| O994_RS13970                     | EF0032 |               | 1.7  | putative copper transporter                          | 5.80E-05 |
| O994_RS13375                     | EF0176 |               | 1.4  | hypothetical protein                                 | 3.10E-02 |
| O994_RS13100                     | EF0238 | <i>cbiO</i>   | 1.6  | cobalt transporter ATP-binding protein               | 2.30E-02 |
| O994_RS13090                     | EF0239 |               | 1.5  | cobalt transport family protein                      | 3.50E-02 |
| O994_RS03250                     | EF0907 |               | 1.6  | peptide ABC transporter peptide-binding protein      | 3.30E-03 |
| O994_RS03275                     | EF0912 |               | 1.6  | peptide ABC transporter ATP-binding protein          | 3.80E-03 |
| O994_RS03420                     | EF0941 |               | 1.9  | ABC transporter ATP-binding protein                  | 2.30E-03 |
| O994_RS03425                     | EF0942 |               | 1.6  | ABC transporter ATP-binding protein/permease         | 9.20E-02 |
| O994_RS04770                     | EF1198 |               | 3.2  | ABC transporter permease                             | 2.60E-28 |

|              |        |              |      |                                                                       |          |
|--------------|--------|--------------|------|-----------------------------------------------------------------------|----------|
| O994_RS04775 | EF1199 |              | 3.2  | phosphate ABC transporter: substrate-binding protein                  | 1.10E-27 |
| O994_RS05035 | EF1253 |              | 1.8  | ABC transporter substrate-binding protein                             | 3.90E-02 |
| O994_RS05085 | EF1263 |              | 2.3  | ftsX-like permease                                                    | 1.20E-07 |
| O994_RS06690 | EF1575 |              | 1.4  | ABC transporter ATP-binding protein                                   | 9.30E-02 |
| O994_RS07295 | EF1705 |              | 2.7  | phosphate-binding protein                                             | 9.00E-21 |
| O994_RS07580 | EF1761 | <i>ftsE</i>  | 1.5  | cell division ATP-binding protein                                     | 1.50E-02 |
| O994_RS07820 | EF1814 |              | 3.6  | MFS transporter                                                       | 4.60E-13 |
| O994_RS07480 | EF2074 |              | 4.4  | ABC transporter ATP-binding protein                                   | 5.30E-17 |
| O994_RS09855 | EF2394 | <i>sufC</i>  | 1.4  | ABC transporter ATP-binding protein                                   | 4.60E-02 |
| O994_RS10825 | EF2639 |              | 1.6  | ABC transporter ATP-binding protein                                   | 4.60E-03 |
| O994_RS01460 | EF2985 |              | 1.5  | ABC transporter permease                                              | 2.80E-02 |
| O994_RS01455 | EF2986 |              | 2.1  | ABC transporter ATP-binding protein                                   | 4.80E-08 |
| O994_RS01450 | EF2987 |              | 2.4  | HlyD family efflux transporter periplasmic adaptor subunit            | 9.80E-11 |
| O994_RS01150 | EF3041 |              | 2.2  | peptide ABC transporter substrate-binding protein                     | 1.30E-08 |
| O994_RS00870 | EF3108 | <i>opp2B</i> | 3.7  | oligopeptide ABC transporter permease                                 | 2.20E-35 |
| O994_RS00865 | EF3109 | <i>opp2F</i> | 4.1  | oligopeptide ABC transporter ATP-binding protein                      | 2.40E-33 |
| O994_RS12740 | EF0295 |              | -2.1 | V-type ATPase subunit J                                               | 1.70E-07 |
| O994_RS12735 | EF0296 | <i>napA</i>  | -2.3 | Na <sup>+</sup> /H <sup>+</sup> antiporter                            | 1.70E-15 |
| O994_RS01540 | EF0420 |              | -1.6 | drug resistance transporter EmrB/QacA family protein                  | 5.50E-02 |
| O994_RS02130 | EF0674 |              | -1.8 | glycine betaine/carnitine/choline ABC transporter ATP-binding protein | 9.50E-04 |
| O994_RS02135 | EF0675 |              | -1.7 | glycine betaine/carnitine/choline ABC transporter ATP-binding protein | 5.50E-03 |
| O994_RS02380 | EF0717 |              | -3.3 | PTS system fructose-specific transporter subunit IIABC                | 7.90E-03 |
| O994_RS02395 | EF0720 |              | -1.9 | voltage-gated chloride channel family protein                         | 1.00E-03 |
| O994_RS02485 | EF0739 |              | -1.7 | nicotinamide mononucleotide transporter                               | 1.00E-03 |
| O994_RS02510 | EF0744 |              | -2.3 | sodium/dicarboxylate symporter family protein                         | 9.70E-06 |
| O994_RS02705 | EF0785 |              | -1.7 | drug resistance transporter EmrB/QacA family protein                  | 1.30E-03 |
| O994_RS03085 | EF0872 |              | -3.2 | KUP/HAK/KT family potassium transporter                               | 3.80E-45 |
| O994_RS03415 | EF0940 |              | -1.6 | folate family ECF transporter S component                             | 3.80E-03 |
| O994_RS03920 | EF1042 |              | -1.9 | multidrug efflux MFS transporter                                      | 2.50E-05 |
| O994_RS05615 | EF1365 |              | -2.0 | AI-2E family transporter                                              | 3.70E-04 |

|              |        |             |      |                                                               |          |
|--------------|--------|-------------|------|---------------------------------------------------------------|----------|
| O994_RS06380 | EF1516 |             | -2.2 | PTS system transporter subunit IIABC                          | 3.80E-05 |
| O994_RS06525 | EF1541 |             | -1.6 | riboflavin transporter                                        | 2.20E-02 |
| O994_RS06835 | EF1607 |             | -2.2 | PTS glucose transporter subunit IIA                           | 1.10E-05 |
| O994_RS07425 | EF1732 |             | -2.3 | ABC transporter ATP-binding protein/peptidase                 | 1.30E-08 |
| O994_RS07430 | EF1733 |             | -2.1 | ABC transporter ATP-binding protein/peptidase                 | 3.00E-07 |
| O994_RS07745 | EF1798 |             | -1.7 | AI-2E family transporter                                      | 4.90E-03 |
| O994_RS13495 | EF1878 |             | -4.1 | ATP/GTP-binding protein                                       | 8.00E-09 |
| O994_RS09390 | EF2221 |             | -2.2 | ABC transporter substrate-binding protein                     | 7.00E-04 |
| O994_RS09395 | EF2222 |             | -2.4 | ABC transporter permease                                      | 7.70E-05 |
| O994_RS09415 | EF2226 |             | -5.0 | ABC transporter ATP-binding protein/permease                  | 1.70E-42 |
| O994_RS09420 | EF2227 |             | -5.2 | ABC transporter ATP-binding protein/permease                  | 1.00E-39 |
| O994_RS10190 | EF2463 |             | -2.8 | voltage-gated chloride channel family protein                 | 2.00E-08 |
| O994_RS10280 | EF2486 | <i>cpsJ</i> | -1.7 | ABC transporter ATP-binding protein                           | 2.90E-02 |
| O994_RS10395 | EF2509 |             | -1.7 | AziC family ABC transporter permease                          | 2.30E-02 |
| O994_RS10835 | EF2641 |             | -2.1 | glycine betaine/L-proline ABC transporter ATP-binding protein | 4.10E-03 |
| O994_RS10840 | EF2642 |             | -2.0 | glycine betaine/L-proline-binding permease                    | 3.80E-03 |
| O994_RS10875 | EF2649 |             | -4.3 | spermidine/putrescine ABC transporter                         | 2.10E-44 |
| O994_RS10880 | EF2650 |             | -4.5 | spermidine/putrescine ABC transporter permease                | 6.30E-58 |
| O994_RS10885 | EF2651 |             | -4.4 | spermidine/putrescine ABC transporter permease                | 1.20E-44 |
| O994_RS10890 | EF2652 |             | -4.2 | spermidine/putrescine ABC transporter ATP-binding protein     | 4.30E-46 |
| O994_RS10960 | EF2668 | <i>mgtE</i> | -1.7 | magnesium transporter                                         | 1.70E-04 |
| O994_RS11015 | EF2680 |             | -2.5 | ABC transporter ATP-binding protein/permease                  | 4.30E-16 |
| O994_RS11430 | EF2768 |             | -3.6 | hypothetical protein                                          | 2.50E-09 |
| O994_RS11435 | EF2769 |             | -3.2 | ABC transporter ATP-binding protein                           | 7.40E-16 |
| O994_RS11440 | EF2770 |             | -3.4 | energy-coupling factor transport system permease protein      | 1.00E-15 |
| O994_RS11450 | EF2772 |             | -2.2 | multidrug efflux MFS transporter                              | 1.40E-06 |
| O994_RS01240 | EF3022 |             | -2.4 | sodium:dicarboxylate symporter family protein                 | 9.90E-06 |
| O994_RS01090 | EF3053 | <i>thiT</i> | -1.8 | energy-coupled thiamine transporter                           | 1.10E-04 |

### **Metabolism of cofactors and vitamins**

|              |        |             |     |                               |          |
|--------------|--------|-------------|-----|-------------------------------|----------|
| O994_RS12285 | EF0446 | <i>menE</i> | 1.6 | 2-succinylbenzoate-CoA ligase | 2.00E-03 |
| O994_RS12080 | EF0517 |             | 1.8 | 2-dehydropantoate 2-reductase | 2.00E-02 |



|              |        |             |      |                                                            |          |
|--------------|--------|-------------|------|------------------------------------------------------------|----------|
| O994_RS02965 | EF0848 | <i>acpS</i> | 1.8  | holo-ACP synthase                                          | 2.90E-04 |
| O994_RS03600 | EF0978 | <i>fold</i> | 1.5  | bifunctional 5,10-methylene-tetrahydrofolate dehydrogenase | 2.90E-02 |
| O994_RS03905 | EF1039 |             | 2.6  | Cof-type HAD-IIB family hydrolase                          | 6.40E-18 |
| O994_RS06970 | EF1637 | <i>eutT</i> | 2.0  | cobalamin adenosyltransferase                              | 8.00E-02 |
| O994_RS07395 | EF1725 | <i>fhs</i>  | 2.2  | formate--tetrahydrofolate ligase                           | 2.00E-12 |
| O994_RS10130 | EF2451 | <i>coaD</i> | 2.9  | pantetheine-phosphate adenylyltransferase                  | 7.50E-20 |
| O994_RS08535 | EF1989 | <i>hemH</i> | -1.9 | ferrochelatase                                             | 1.70E-03 |
| O994_RS08880 | EF2056 | <i>ubiA</i> | -2.2 | 1,4-dihydroxy-2-naphthoate octaprenyltransferase           | 2.80E-10 |
| O994_RS11425 | EF2767 |             | -3.5 | transcriptional regulator                                  | 3.60E-09 |

#### **Metabolism of other amino acids**

|              |        |             |     |                                                |          |
|--------------|--------|-------------|-----|------------------------------------------------|----------|
| O994_RS04395 | EF1121 | <i>racE</i> | 2.0 | glutamate racemase                             | 1.40E-05 |
| O994_RS11290 | EF2738 |             | 2.4 | thioredoxin reductase/glutathione-like protein | 7.90E-06 |

#### **Metabolism of terpenoids and polyketides**

|              |        |             |     |                                                                  |           |
|--------------|--------|-------------|-----|------------------------------------------------------------------|-----------|
| O994_RS03220 | EF0901 | <i>fni</i>  | 2.7 | isopentenyl pyrophosphate isomerase                              | 1.40E-11  |
| O994_RS03225 | EF0902 | <i>mvaK</i> | 2.9 | phosphomevalonate kinase                                         | 1.30E-14  |
| O994_RS03230 | EF0903 | <i>mvaD</i> | 3.7 | mevalonate diphosphate decarboxylase                             | 1.10E-22  |
| O994_RS03235 | EF0904 | <i>mvk</i>  | 3.1 | mevalonate kinase                                                | 1.80E-20  |
| O994_RS05600 | EF1363 | <i>mvaS</i> | 4.4 | hydroxymethylglutaryl-CoA synthase                               | 7.80E-96  |
| O994_RS14705 | EF1364 | <i>mvaE</i> | 4.6 | acetyl-CoA acetyltransferase/hydroxymethylglutaryl-CoA reductase | 5.50E-93  |
| O994_RS10325 | EF2495 | <i>uppS</i> | 3.3 | UDP-diphosphate synthase                                         | 3.60E-39  |
| O994_RS00245 | EF3245 | <i>uppP</i> | 5.2 | cell-envelope associated acid phosphatase                        | 1.60E-102 |

#### **Nucleotide metabolism**

|              |        |               |     |                                                   |          |
|--------------|--------|---------------|-----|---------------------------------------------------|----------|
| O994_RS13935 | EF0039 |               | 1.6 | deoxyuridine 5`-triphosphate nucleotidohydrolase  | 4.10E-03 |
| O994_RS13380 | EF0175 | <i>cdd</i>    | 1.5 | cytidine deaminase                                | 6.70E-02 |
| O994_RS12975 | EF0264 | <i>hpt</i>    | 1.4 | hypoxanthine-guanine phosphoribosyltransferase    | 6.10E-02 |
| O994_RS03890 | EF1036 | <i>ndk</i>    | 2.8 | nucleoside-diphosphate kinase                     | 1.70E-07 |
| O994_RS06555 | EF1547 | <i>cmk</i>    | 2.1 | cytidylate kinase                                 | 3.00E-10 |
| O994_RS09560 | EF2361 | <i>purB</i>   | 1.5 | adenylosuccinate lyase                            | 4.60E-02 |
| O994_RS09565 | EF2362 | <i>purK-2</i> | 1.9 | 5-(carboxyamino)imidazole ribonucleotide synthase | 1.10E-04 |

|              |        |               |      |                                                           |          |
|--------------|--------|---------------|------|-----------------------------------------------------------|----------|
| O994_RS11360 | EF2754 | <i>nrdD</i>   | 1.9  | anaerobic ribonucleoside triphosphate reductase           | 1.10E-04 |
| O994_RS14060 | EF0014 | <i>purA</i>   | -2.3 | adenylosuccinate synthetase                               | 1.10E-08 |
| O994_RS04520 | EF1147 | <i>pyrG</i>   | -3.5 | CTP synthetase                                            | 2.50E-24 |
| <b>Other</b> |        |               |      |                                                           |          |
| O994_RS13770 | EF0076 |               | 1.7  | short chain dehydrogenase/reductase family oxidoreductase | 1.90E-04 |
| O994_RS12660 | EF0367 |               | 2.2  | haloacid dehalogenase                                     | 3.10E-05 |
| O994_RS12535 | EF0394 | <i>salB</i>   | 1.7  | serine protease                                           | 3.40E-02 |
| O994_RS01630 | EF0706 |               | 2.6  | ATP-dependent Clp protease ATP-binding subunit            | 2.00E-13 |
| O994_RS02975 | EF0850 |               | 2.1  | type II toxin-antitoxin system PemK/MazF family toxin     | 4.00E-06 |
| O994_RS03685 | EF0995 | <i>ftsQ</i>   | 2.2  | cell division protein                                     | 1.10E-09 |
| O994_RS03690 | EF0996 | <i>ftsA</i>   | 1.5  | cell division protein                                     | 3.20E-02 |
| O994_RS03695 | EF0997 | <i>ftsZ</i>   | 1.5  | cell division protein                                     | 4.50E-02 |
| O994_RS03720 | EF1002 | <i>divIVA</i> | 2.3  | cell division protein                                     | 6.10E-14 |
| O994_RS04245 | EF1091 | <i>ebpA</i>   | 3.8  | endocarditis and biofilm-associated pilus tip protein     | 9.70E-05 |
| O994_RS04570 | EF1157 |               | 1.8  | Sapep family Mn(2 <sup>+</sup> )-dependent dipeptidase    | 6.10E-03 |
| O994_RS04795 | EF1203 | <i>ruvX</i>   | 1.4  | Holliday junction resolvase-like protein                  | 7.70E-02 |
| O994_RS04915 | EF1227 |               | 2.1  | NADPH-dependent oxidoreductase                            | 6.00E-03 |
| O994_RS05190 | EF1284 |               | 2.0  | putative phage structural protein                         | 1.70E-03 |
| O994_RS05195 | EF1285 |               | 1.9  | phage major tail protein                                  | 1.70E-02 |
| O994_RS05275 | EF1301 |               | 2.7  | cell cycle protein                                        | 1.50E-07 |
| O994_RS05645 | EF1371 |               | 1.4  | metallo-β-lactamase                                       | 6.40E-02 |
| O994_RS06080 | EF1455 | <i>terL</i>   | 1.9  | phage terminase large subunit                             | 8.20E-03 |
| O994_RS06505 | EF1537 | <i>xerD</i>   | 1.7  | site-specific tyrosine recombinase                        | 5.00E-03 |
| O994_RS06570 | EF1550 | <i>hup</i>    | 1.5  | DNA-binding protein                                       | 5.10E-02 |
| O994_RS06745 | EF1586 | <i>nox</i>    | 2.5  | NADH oxidase                                              | 6.60E-12 |
| O994_RS07205 | EF1685 | <i>hlyIII</i> | 1.9  | hemolysin III: type II toxin                              | 1.40E-07 |
| O994_RS09370 | EF2217 |               | 2.6  | glycoside hydrolase family 92 protein                     | 1.30E-15 |
| O994_RS10160 | EF2457 |               | 2.0  | FtsW/RodA/SpoVE family cell cycle protein                 | 2.00E-06 |
| O994_RS10360 | EF2502 |               | 4.5  | putative cell division protein                            | 1.00E-58 |
| O994_RS10610 | EF2590 |               | 3.3  | serine hydrolase: β-lactamase transpeptidase family       | 5.40E-23 |

|                                    |        |             |      |                                                               |           |
|------------------------------------|--------|-------------|------|---------------------------------------------------------------|-----------|
| O994_RS01165                       | EF3037 | <i>pepA</i> | 1.7  | glutamyl-aminopeptidase                                       | 4.90E-03  |
| O994_RS00885                       | EF3097 | <i>rnc</i>  | 2.4  | ribonuclease III                                              | 8.20E-10  |
| O994_RS13715                       | EF0090 |             | -1.8 | diacylglycerol kinase catalytic subunit                       | 1.50E-05  |
| O994_RS12785                       | EF0286 |             | -2.8 | fibronectin-binding protein                                   | 1.40E-09  |
| O994_RS12125                       | EF0479 |             | -1.6 | phage integrase family site specific recombinase              | 4.70E-03  |
| O994_RS02445                       | EF0730 |             | -2.6 | thioredoxin family protein                                    | 1.10E-04  |
| O994_RS02490                       | EF0740 |             | -1.5 | deoxynucleoside kinase                                        | 7.20E-02  |
| O994_RS02635                       | EF0771 | <i>clpP</i> | -1.9 | ATP-dependent Clp protease proteolytic subunit                | 3.20E-07  |
| O994_RS04290                       | EF1099 |             | -2.5 | LPXTG cell wall anchor domain-containing protein              | 4.60E-09  |
| O994_RS05710                       | EF1384 | <i>mprF</i> | -2.2 | Phosphatidylglycerol lysyltransferase                         | 2.90E-05  |
| O994_RS06755                       | EF1590 |             | -2.6 | protease synthase and sporulation negative regulatory protein | 7.90E-06  |
| O994_RS08675                       | EF2015 |             | -1.6 | minor head protein                                            | 9.60E-02  |
| O994_RS10215                       | EF2472 | <i>gcp</i>  | -1.6 | <i>O</i> -sialoglycoprotein endopeptidase                     | 1.40E-02  |
| O994_RS11800                       | EF2899 |             | -2.8 | pyridine nucleotide-disulfide family oxidoreductase           | 4.00E-08  |
| O994_RS14305                       | EF3296 | <i>ychF</i> | -1.9 | GTP-dependent nucleic acid-binding protein                    | 7.60E-07  |
| <b><u>Poorly characterised</u></b> |        |             |      |                                                               |           |
| O994_RS13925                       | EF0041 |             | 1.6  | PilT domain-containing protein                                | 9.20E-04  |
| O994_RS12705                       | EF0302 |             | 1.9  | C1 family peptidase                                           | 1.00E-07  |
| O994_RS12665                       | EF0366 |             | 3.1  | DUF72 domain-containing protein                               | 7.10E-15  |
| O994_RS12255                       | EF0452 |             | 2.5  | acyl-CoA synthetase                                           | 5.40E-06  |
| O994_RS02165                       | EF0681 |             | 2.0  | YlbF family regulator                                         | 2.40E-05  |
| O994_RS02175                       | EF0683 |             | 1.4  | AAA family ATPase                                             | 7.50E-02  |
| O994_RS02180                       | EF0684 |             | 2.4  | HD domain-containing protein                                  | 1.50E-13  |
| O994_RS02340                       | EF0708 |             | 3.5  | hypothetical protein                                          | 2.10E-32  |
| O994_RS02525                       | EF0747 |             | 1.9  | DUF1003 domain-containing protein                             | 1.00E-05  |
| O994_RS02695                       | EF0783 |             | 3.2  | acetyltransferase                                             | 5.30E-33  |
| O994_RS02785                       | EF0802 |             | 8.8  | DUF3955 domain-containing protein                             | 1.30E-110 |
| O994_RS02820                       | EF0819 |             | 3.2  | DUF960 domain-containing protein                              | 1.30E-24  |
| O994_RS03575                       | EF0972 |             | 4.6  | metallophosphoesterase                                        | 5.40E-66  |
| O994_RS03660                       | EF0990 | <i>ftsL</i> | 3.7  | cell division protein                                         | 5.20E-39  |

|              |        |             |     |                                                         |           |
|--------------|--------|-------------|-----|---------------------------------------------------------|-----------|
| O994_RS03740 | EF1006 |             | 3.7 | DUF4828 domain-containing protein                       | 1.20E-50  |
| O994_RS03750 | EF1008 |             | 1.5 | Gfo/Idh/MocA family oxidoreductase                      | 7.50E-02  |
| O994_RS04250 | EF1092 | <i>ebpB</i> | 2.8 | endocarditis and biofilm-associated pilus minor subunit | 6.30E-02  |
| O994_RS04450 | EF1132 |             | 4.9 | CBS-domain containing hypothetical protein              | 9.90E-76  |
| O994_RS05050 | EF1200 |             | 2.3 | threonine/serine exporter family protein                | 7.30E-04  |
| O994_RS04800 | EF1204 |             | 1.5 | DUF1292 domain-containing protein                       | 4.10E-03  |
| O994_RS04910 | EF1226 |             | 2.9 | NAD(P)H-dependent oxidoreductase                        | 6.40E-07  |
| O994_RS04935 | EF1231 |             | 6.3 | metallophosphoesterase                                  | 2.60E-107 |
| O994_RS05020 | EF1249 | <i>efba</i> | 1.7 | fibronectin/fibrinogen-binding protein                  | 2.30E-03  |
| O994_RS05060 | EF1258 |             | 4.7 | hypothetical protein                                    | 1.80E-52  |
| O994_RS05080 | EF1262 |             | 2.7 | hypothetical protein                                    | 3.50E-12  |
| O994_RS05465 | EF1327 |             | 4.4 | 2-hydroxyacyl-CoA dehydratase                           | 1.20E-34  |
| O994_RS06085 | EF1456 |             | 2.5 | DUF1073 domain-containing protein                       | 1.70E-07  |
| O994_RS06110 | EF1461 |             | 2.8 | DUF2213 domain-containing protein                       | 3.40E-13  |
| O994_RS06115 | EF1462 |             | 2.5 | hypothetical protein                                    | 8.40E-07  |
| O994_RS06120 | EF1463 |             | 2.2 | DUF2184 domain-containing protein                       | 1.90E-04  |
| O994_RS06150 | EF1469 |             | 1.6 | DUF3383 family protein                                  | 3.70E-02  |
| O994_RS06440 | EF1523 |             | 4.2 | hypothetical protein                                    | 1.30E-66  |
| O994_RS06575 | EF1552 |             | 2.2 | hypothetical protein                                    | 4.70E-08  |
| O994_RS06580 | EF1553 |             | 1.9 | tetratricopeptide repeat protein                        | 3.20E-06  |
| O994_RS06670 | EF1571 |             | 2.6 | hypothetical protein                                    | 3.10E-11  |
| O994_RS06675 | EF1572 |             | 2.2 | hypothetical protein                                    | 8.20E-09  |
| O994_RS06715 | EF1580 |             | 2.6 | HAD superfamily hydrolase                               | 8.30E-12  |
| O994_RS06720 | EF1581 | <i>tkt</i>  | 2.0 | transketolase                                           | 5.30E-06  |
| O994_RS06850 | EF1610 |             | 2.4 | DUF1803 domain-containing protein                       | 4.00E-09  |
| O994_RS08155 | EF1906 |             | 1.8 | hypothetical integral membrane protein                  | 2.80E-08  |
| O994_RS08170 | EF1909 |             | 2.1 | hypothetical protein                                    | 5.80E-10  |
| O994_RS09045 | EF2149 |             | 1.6 | hypothetical protein                                    | 7.20E-04  |
| O994_RS09075 | EF2155 |             | 2.2 | phosphoglucosamine mutase                               | 1.60E-11  |
| O994_RS09080 | EF2156 |             | 3.5 | hypothetical protein                                    | 7.50E-48  |
| O994_RS09360 | EF2215 |             | 4.3 | hypothetical protein                                    | 1.10E-52  |

|              |        |              |      |                                            |          |
|--------------|--------|--------------|------|--------------------------------------------|----------|
| O994_RS09365 | EF2216 |              | 2.0  | FUSC family protein                        | 8.80E-04 |
| O994_RS09620 | EF2373 |              | 1.6  | DUF5590 domain-containing protein          | 4.10E-03 |
| O994_RS09850 | EF2393 | <i>sufD</i>  | 1.7  | Fe-S cluster assembly protein              | 2.30E-03 |
| O994_RS10035 | EF2433 |              | 1.9  | phosphoglycerate mutase family protein     | 2.00E-06 |
| O994_RS10125 | EF2450 |              | 2.4  | PDZ domain-containing protein              | 2.70E-11 |
| O994_RS10165 | EF2458 |              | 2.5  | YlaN family protein                        | 2.80E-09 |
| O994_RS10205 | EF2470 |              | 4.1  | putative metal-dependent phosphohydrolase  | 1.00E-54 |
| O994_RS10240 | EF2477 |              | 1.9  | SPFH domain-containing protein             | 9.30E-04 |
| O994_RS10245 | EF2478 |              | 1.7  | hypothetical protein                       | 3.20E-03 |
| O994_RS11270 | EF2734 |              | 3.8  | Gfo/Idh/MocA family oxidoreductase         | 6.90E-58 |
| O994_RS11505 | EF2784 |              | 2.9  | DUF3042 domain containing protein          | 6.60E-16 |
| O994_RS11605 | EF2862 |              | 5.5  | hypothetical protein                       | 1.60E-76 |
| O994_RS11625 | EF2867 | <i>tmcAL</i> | 1.4  | nucleotidyltransferase                     | 6.10E-02 |
| O994_RS11790 | EF2896 |              | 6.1  | DUF3955 domain-containing protein          | 3.30E-31 |
| O994_RS11880 | EF2915 | <i>mltG</i>  | 2.9  | mltG-like protein                          | 2.10E-32 |
| O994_RS11945 | EF2929 |              | 1.7  | hypothetical protein                       | 5.30E-03 |
| O994_RS11950 | EF2930 |              | 1.8  | conserved integral membrane protein        | 3.40E-03 |
| O994_RS01170 | EF3036 |              | 1.7  | thioredoxin family protein                 | 7.80E-04 |
| O994_RS00990 | EF3074 |              | 1.6  | WxL domain-containing protein              | 8.30E-02 |
| O994_RS00895 | EF3095 |              | 2.6  | Cof-type HAD-IIB family hydrolase          | 5.00E-13 |
| O994_RS00655 | EF3149 |              | 2.1  | helix-turn-helix domain-containing protein | 3.50E-10 |
| O994_RS00650 | EF3150 |              | 4.3  | M16 family peptidase                       | 2.30E-71 |
| O994_RS00645 | EF3151 |              | 4.2  | hypothetical protein                       | 1.60E-58 |
| O994_RS00520 | EF3179 |              | 1.6  | DUF3298 domain-containing protein          | 6.20E-02 |
| O994_RS00475 | EF3188 |              | 1.7  | hypothetical protein                       | 6.70E-04 |
| O994_RS00305 | EF3234 |              | 2.5  | DUF5105 domain-containing protein          | 1.00E-13 |
| O994_RS14110 | EF0003 |              | -2.3 | RNA binding protein                        | 4.00E-12 |
| O994_RS13710 | EF0091 |              | -1.7 | helix-turn-helix domain-containing protein | 6.10E-05 |
| O994_RS12745 | EF0294 |              | -1.4 | dihydrofolate reductase                    | 7.20E-02 |
| O994_RS12130 | EF0477 |              | -1.9 | hypothetical protein                       | 4.60E-02 |

|              |        |             |      |                                                 |          |
|--------------|--------|-------------|------|-------------------------------------------------|----------|
| O994_RS01945 | EF0638 |             | -2.8 | DUF1307 domain-containing protein               | 1.10E-12 |
| O994_RS02215 | EF0690 |             | -2.3 | phosphotransferase family protein               | 1.80E-07 |
| O994_RS02215 | EF0690 |             | -2.3 | phosphotransferase family protein               | 1.80E-07 |
| O994_RS03305 | EF0918 |             | -2.1 | DUF1304 domain-containing protein               | 2.90E-04 |
| O994_RS03560 | EF0969 |             | -1.8 | ribosomal-processing cysteine protease          | 2.90E-06 |
| O994_RS03570 | EF0971 | <i>psiE</i> | -1.6 | phosphate-starvation-inducible protein          | 5.70E-02 |
| O994_RS03945 | EF1047 |             | -1.5 | DUF177 domain-containing protein                | 2.00E-02 |
| O994_RS04205 | EF1082 |             | -1.5 | hypothetical protein                            | 8.50E-02 |
| O994_RS04235 | EF1089 |             | -2.3 | DUF805 domain-containing protein                | 9.90E-08 |
| O994_RS04305 | EF1102 |             | -1.8 | YxeA family protein                             | 1.60E-03 |
| O994_RS04510 | EF1145 |             | -1.8 | DUF1934 domain-containing protein               | 2.00E-04 |
| O994_RS04605 | EF1164 |             | -2.0 | HD domain-containing protein                    | 3.30E-04 |
| O994_RS05010 | EF1247 |             | -2.6 | iron-sulfur cluster biosynthesis family protein | 1.60E-09 |
| O994_RS05015 | EF1248 |             | -3.2 | hypothetical protein                            | 1.80E-35 |
| O994_RS05260 | EF1298 |             | -1.9 | DUF1048 domain-containing protein               | 6.20E-06 |
| O994_RS05620 | EF1366 |             | -1.8 | hypothetical protein                            | 2.50E-03 |
| O994_RS05670 | EF1376 |             | -2.0 | VanZ family protein                             | 4.90E-04 |
| O994_RS05705 | EF1383 |             | -1.9 | DUF1294 domain-containing protein               | 1.70E-03 |
| O994_RS05920 | EF1425 |             | -2.2 | helix-turn-helix domain-containing protein      | 7.60E-03 |
| O994_RS05925 | EF1427 |             | -2.3 | hypothetical protein                            | 7.30E-03 |
| O994_RS05930 | EF1428 |             | -2.5 | hypothetical protein                            | 2.60E-03 |
| O994_RS05940 | EF1430 |             | -1.8 | AAA family ATPase                               | 3.10E-02 |
| O994_RS06845 | EF1609 |             | -3.4 | DUF2179 domain-containing protein               | 2.60E-12 |
| O994_RS07210 | EF1686 |             | -1.8 | hypothetical protein                            | 6.60E-02 |
| O994_RS07435 | EF1734 |             | -1.8 | YneF family protein                             | 8.90E-04 |
| O994_RS07635 | EF1774 |             | -2.3 | QueT transporter family protein                 | 1.60E-07 |
| O994_RS08115 | EF1897 |             | -4.8 | hypothetical protein                            | 4.90E-16 |
| O994_RS08490 | EF1980 |             | -3.2 | hypothetical protein                            | 1.20E-14 |
| O994_RS08925 | EF2065 |             | -1.5 | DUF1033 family protein                          | 5.10E-02 |
| O994_RS10005 | EF2427 |             | -2.3 | hypothetical protein                            | 8.00E-12 |
| O994_RS10195 | EF2467 |             | -3.1 | hypothetical protein                            | 9.30E-17 |

|              |        |  |      |                                         |          |
|--------------|--------|--|------|-----------------------------------------|----------|
| O994_RS10400 | EF2511 |  | -1.7 | AzID domain-containing protein          | 8.60E-02 |
| O994_RS10415 | EF2548 |  | -1.7 | hypothetical protein                    | 2.90E-02 |
| O994_RS10925 | EF2659 |  | -2.5 | QueT transporter family protein         | 9.50E-09 |
| O994_RS10930 | EF2661 |  | -2.0 | diacylglycerol kinase catalytic subunit | 1.20E-04 |
| O994_RS10980 | EF2672 |  | -1.7 | CYTH domain-containing protein          | 4.20E-03 |
| O994_RS10985 | EF2673 |  | -1.5 | DsbA family protein                     | 5.00E-02 |
| O994_RS00225 | EF2692 |  | -1.7 | WxL domain-containing protein           | 1.40E-03 |
| O994_RS11775 | EF2893 |  | -1.8 | hypothetical protein                    | 1.40E-04 |
| O994_RS01260 | EF3018 |  | -1.8 | hypothetical protein                    | 6.40E-05 |
| O994_RS00670 | EF3146 |  | -2.5 | hypothetical protein                    | 3.60E-08 |
| O994_RS00240 | EF3247 |  | -3.4 | putative holin-like toxin               | 3.00E-15 |
| O994_RS00235 | EF3249 |  | -3.2 | putative holin-like toxin               | 3.90E-08 |
| O994_RS14315 | EF3294 |  | -3.3 | hypothetical protein                    | 7.20E-27 |
| O994_RS14310 | EF3295 |  | -2.1 | DUF1129 domain-containing protein       | 6.90E-10 |
| O994_RS14300 | EF3297 |  | -1.8 | DUF951 domain-containing protein        | 2.40E-04 |
| O994_RS14220 | EF3314 |  | -3.0 | cell wall surface anchor family protein | 5.90E-11 |

### **Replication and repair**

|              |        |              |      |                                                    |          |
|--------------|--------|--------------|------|----------------------------------------------------|----------|
| O994_RS13930 | EF0040 | <i>radA</i>  | 1.8  | DNA repair protein                                 | 8.10E-06 |
| O994_RS03630 | EF0984 | <i>recN</i>  | 1.7  | DNA repair protein                                 | 1.60E-03 |
| O994_RS05810 | EF1404 | <i>mutS2</i> | 2.4  | MutS2 family protein                               | 1.30E-22 |
| O994_RS06750 | EF1587 | <i>mutT</i>  | 4.4  | DNA mismatch repair protein                        | 6.10E-48 |
| O994_RS07020 | EF1648 | <i>xerC</i>  | 2.5  | tyrosine recombinase: DNA repair and recombination | 1.60E-14 |
| O994_RS11060 | EF2689 | <i>sbcC</i>  | 1.6  | exonuclease                                        | 1.30E-02 |
| O994_RS11065 | EF2690 | <i>sbcD</i>  | 1.9  | exonuclease                                        | 2.50E-03 |
| O994_RS00890 | EF3096 | <i>smc</i>   | 3.4  | chromosome segregation protein                     | 4.70E-31 |
| O994_RS00765 | EF3125 | <i>priA</i>  | 2.2  | primosomal protein                                 | 6.50E-08 |
| O994_RS00585 | EF3166 | <i>mutL</i>  | 1.5  | DNA mismatch repair protein                        | 6.90E-02 |
| O994_RS14085 | EF0008 | <i>ssb-I</i> | -1.9 | single-strand binding protein                      | 9.80E-07 |
| O994_RS14105 | EF0004 | <i>recF</i>  | -1.7 | recombination protein F                            | 3.90E-04 |
| O994_RS04595 | EF1162 |              | -2.5 | helicase                                           | 7.40E-22 |

**Signal transduction**

|              |        |             |      |                                                 |           |
|--------------|--------|-------------|------|-------------------------------------------------|-----------|
| O994_RS05070 | EF1260 | <i>yclR</i> | 2.7  | metal-induced stress response regulator         | 4.70E-24  |
| O994_RS05075 | EF1261 | <i>yclK</i> | 2.8  | metal-induced sensor kinase                     | 3.40E-23  |
| O994_RS01215 | EF3027 | <i>htrA</i> | 1.7  | serine protease                                 | 4.00E-04  |
| O994_RS01065 | EF3058 |             | 4.4  | phosphotyrosine protein phosphatase             | 2.30E-71  |
| O994_RS00790 | EF3120 | <i>ireK</i> | 2.1  | serine/threonine protein kinase IreK            | 8.70E-10  |
| O994_RS00450 | EF3194 | <i>lrgA</i> | 2.0  | negative regulator of murein hydrolase activity | 3.50E-02  |
| O994_RS14335 | EF3289 | <i>croR</i> | 7.2  | ompR/phoB type DNA-binding response regulator   | 5.10E-148 |
| O994_RS14330 | EF3290 | <i>croS</i> | 7.7  | sensor kinase                                   | 6.00E-164 |
| O994_RS08900 | EF2060 | <i>cydB</i> | -1.6 | cytochrome d ubiquinol oxidase subunit II       | 3.60E-04  |
| O994_RS08905 | EF2061 | <i>cydA</i> | -1.8 | cytochrome d ubiquinol oxidase subunit I        | 4.00E-07  |
| O994_RS09375 | EF2218 |             | -2.8 | AraC family transcriptional regulator           | 3.70E-13  |
| O994_RS09380 | EF2219 | <i>yesM</i> | -2.6 | sensor histidine kinase                         | 4.10E-13  |
| O994_RS14215 | EF3315 | <i>citG</i> | -1.6 | triphosphoribosyl-dephospho-CoA synthase        | 7.70E-03  |

**Transcriptional regulators**

|              |        |             |     |                                                            |          |
|--------------|--------|-------------|-----|------------------------------------------------------------|----------|
| O994_RS12190 | EF0465 |             | 2.0 | LytR family transcriptional regulator                      | 7.90E-09 |
| O994_RS02225 | EF0692 |             | 2.1 | RpiR family phosphosugar-binding transcriptional regulator | 1.30E-03 |
| O994_RS03125 | EF0881 |             | 1.8 | transcriptional repressor NrdR                             | 4.60E-05 |
| O994_RS03210 | EF0899 |             | 1.8 | post-transcriptional regulator                             | 5.90E-03 |
| O994_RS03625 | EF0983 |             | 2.1 | ArgR family transcriptional regulator                      | 1.80E-05 |
| O994_RS03650 | EF0988 | <i>mraZ</i> | 3.8 | division/cell wall cluster transcriptional repressor       | 5.30E-36 |
| O994_RS04565 | EF1156 |             | 2.3 | GntR family transcriptional regulator                      | 1.30E-05 |
| O994_RS04835 | EF1212 |             | 4.5 | LytR family transcriptional regulator                      | 2.90E-71 |
| O994_RS05280 | EF1302 |             | 4.9 | transcriptional regulator                                  | 1.30E-40 |
| O994_RS05285 | EF1303 |             | 5.6 | LysR family transcriptional regulator                      | 1.70E-53 |
| O994_RS05460 | EF1326 |             | 1.9 | TetR family transcriptional regulator                      | 8.50E-03 |
| O994_RS06660 | EF1569 | <i>psr</i>  | 3.5 | putative transcriptional regulator psr                     | 7.90E-30 |
| O994_RS07005 | EF1645 | <i>codY</i> | 2.8 | GTP-binding transcriptional repressor                      | 9.10E-27 |
| O994_RS09985 | EF2423 |             | 2.2 | winged helix-turn-helix transcriptional regulator          | 7.90E-11 |
| O994_RS11140 | EF2703 |             | 5.4 | LytR family transcriptional regulator                      | 7.80E-30 |



|                           |        |             |      |                                                               |          |
|---------------------------|--------|-------------|------|---------------------------------------------------------------|----------|
| O994_RS11965              | EF2933 | <i>rex</i>  | 1.6  | redox-sensing transcriptional repressor                       | 8.20E-02 |
| O994_RS01385              | EF3002 | <i>sylA</i> | 2.0  | transcriptional regulator                                     | 3.00E-04 |
| O994_RS01060              | EF3059 |             | 4.7  | TetR/AcrR family transcriptional regulator                    | 4.90E-60 |
| O994_RS12400              | EF0421 |             | -2.1 | MerR family transcriptional regulator                         | 5.40E-03 |
| O994_RS12395              | EF0422 |             | -2.5 | IclR family transcriptional regulator                         | 6.90E-10 |
| O994_RS02390              | EF0719 |             | -3.4 | DeoR family transcriptional regulator                         | 2.30E-13 |
| O994_RS03070              | EF0869 |             | -2.2 | Cro/CI family transcriptional regulator                       | 2.80E-05 |
| O994_RS14630              | EF0966 |             | -1.9 | MerR family transcriptional regulator                         | 3.00E-04 |
| O994_RS05255              | EF1297 |             | -1.9 | PadR family transcriptional regulator                         | 2.70E-05 |
| O994_RS05300              | EF1306 | <i>hrcA</i> | -1.8 | heat-inducible transcription repressor                        | 4.00E-03 |
| O994_RS05635              | EF1369 |             | -2.0 | Cro/CI family transcriptional regulator                       | 4.10E-03 |
| O994_RS05905              | EF1423 |             | -2.1 | Cro/CI family transcriptional regulator                       | 1.00E-03 |
| O994_RS06375              | EF1515 |             | -2.2 | BlgG family transcription antiterminator                      | 1.40E-03 |
| O994_RS07265              | EF1699 |             | -1.9 | MerR family transcriptional regulator                         | 1.40E-03 |
| O994_RS08415              | EF1965 |             | -1.9 | SorC family transcriptional regulator                         | 8.20E-09 |
| O994_RS09410              | EF2225 |             | -2.0 | MerR family transcriptional regulator                         | 3.10E-04 |
| O994_RS10010              | EF2428 |             | -2.4 | PadR family transcriptional regulator                         | 8.00E-12 |
| O994_RS10200              | EF2469 |             | -2.0 | Cro/CI family transcriptional regulator                       | 1.40E-05 |
| O994_RS10820              | EF2638 | <i>rex</i>  | -2.2 | redox-sensing transcriptional repressor                       | 2.30E-11 |
| O994_RS10895              | EF2653 |             | -4.1 | Cro/CI family transcriptional regulator                       | 1.20E-42 |
| O994_RS00275              | EF3261 |             | -2.0 | AbrB family transcriptional regulator                         | 2.10E-08 |
| O994_RS00280              | EF3262 |             | -1.9 | AbrB family transcriptional regulator                         | 1.40E-07 |
| O994_RS14150              | EF3328 | <i>citO</i> | -1.6 | GntR family transcriptional regulator                         | 8.30E-02 |
| <b><u>Translation</u></b> |        |             |      |                                                               |          |
| O994_RS12980              | EF0263 | <i>tilS</i> | 1.8  | tRNA(Ile)-lysidine synthase                                   | 4.0E-06  |
| O994_RS02825              | EF0820 | <i>ryIY</i> | 1.6  | 50S ribosomal protein L25                                     | 1.6E-03  |
| O994_RS03465              | EF0950 |             | 1.9  | tRNA (adenosine(37)-N(6)-threonylcarbamoyltransferase complex | 1.0E-03  |
| O994_RS03655              | EF0989 | <i>rsmH</i> | 4.0  | 16S rRNA (cytosine(1402)-N(4))-methyltransferase              | 2.6E-56  |
| O994_RS03725              | EF1003 | <i>ileS</i> | 1.8  | isoleucine-tRNA ligase                                        | 3.50E-04 |
| O994_RS06445              | EF1524 |             | 2.3  | S1 RNA-binding protein                                        | 1.4E-09  |

|              |        |             |      |                                                             |         |
|--------------|--------|-------------|------|-------------------------------------------------------------|---------|
| O994_RS07585 | EF1762 | <i>prfB</i> | 1.7  | peptide chain release factor 2                              | 9.2E-04 |
| O994_RS08445 | EF1971 | <i>hisS</i> | 1.5  | histidyl-tRNA synthetase                                    | 9.3E-02 |
| O994_RS10135 | EF2452 | <i>rsmD</i> | 2.8  | 16S rRNA (guanine(966)-N(2))-methyltransferase              | 4.0E-19 |
| O994_RS00780 | EF3122 | <i>sun</i>  | 1.5  | 16S rRNA (cytosine(967)-C(5))-methyltransferase             | 5.5E-02 |
| O994_RS00770 | EF3123 | <i>fmt</i>  | 1.8  | methionyl-tRNA formyltransferase                            | 2.0E-03 |
| O994_RS00515 | EF3180 |             | 1.8  | $\sigma$ -70 family RNA polymerase $\sigma$ factor          | 2.8E-02 |
| O994_RS14090 | EF0007 | <i>rpsF</i> | -1.7 | 30S ribosomal protein S6                                    | 6.0E-05 |
| O994_RS14080 | EF0009 | <i>rpsR</i> | -1.7 | 30S ribosomal protein S18                                   | 3.7E-05 |
| O994_RS02220 | EF0691 | <i>trmB</i> | -2.3 | tRNA (guanine-N(7)-)-methyltransferase                      | 2.6E-05 |
| O994_RS02830 | EF0821 |             | -1.7 | 16S rRNA pseudouridine(516) synthase                        | 3.3E-03 |
| O994_RS03285 | EF0914 | <i>infC</i> | -3.4 | translation initiation factor IF-3                          | 1.0E-29 |
| O994_RS03290 | EF0915 | <i>rpmI</i> | -3.3 | 50S ribosomal protein L35                                   | 4.8E-30 |
| O994_RS03295 | EF0916 | <i>rplT</i> | -3.1 | 50S ribosomal protein L20                                   | 3.9E-32 |
| O994_RS03555 | EF0968 | <i>rplU</i> | -1.8 | 50S ribosomal protein L21                                   | 1.4E-07 |
| O994_RS03565 | EF0970 | <i>rpmA</i> | -1.7 | 50S ribosomal protein L27                                   | 1.0E-03 |
| O994_RS05095 | EF1265 |             | -2.3 | 23S rRNA (cytosine1962-C5)-methyltransferase                | 1.0E-15 |
| O994_RS08120 | EF1898 | <i>rplS</i> | -1.4 | 50S ribosomal protein L19                                   | 3.0E-02 |
| O994_RS09875 | EF2398 | <i>rpsB</i> | -1.7 | 30S ribosomal protein S2                                    | 2.5E-05 |
| O994_RS10945 | EF2665 | <i>trmL</i> | -2.2 | tRNA (cytidine/uridine-2'-O-)-methyltransferase             | 9.7E-11 |
| O994_RS01210 | EF3028 |             | -1.5 | tRNA-binding domain-containing protein                      | 1.7E-02 |
| O994_RS01030 | EF3065 | <i>rpsO</i> | -2.0 | 30S ribosomal protein S15                                   | 1.1E-06 |
| O994_RS01005 | EF3070 | <i>rpsD</i> | -1.6 | 30S ribosomal protein S4                                    | 1.3E-03 |
| O994_RS00390 | EF3207 |             | -2.3 | dihydrouridine synthase                                     | 2.3E-10 |
| O994_RS14235 | EF3311 | <i>gidA</i> | -2.3 | RNA uridine 5-carboxymethylaminomethyl modification protein | 8.6E-11 |
| O994_RS14230 | EF3312 | <i>trmE</i> | -2.1 | tRNA modification GTPase                                    | 1.5E-06 |
| O994_RS14125 | EF3333 | <i>rpmH</i> | -2.0 | 50S ribosomal protein L34                                   | 3.2E-03 |

#### **Unclassified genetic information processing**

|              |        |             |      |                                   |         |
|--------------|--------|-------------|------|-----------------------------------|---------|
| O994_RS11005 | EF2678 | <i>spxA</i> | 1.6  | hypothetical protein              | 2.2E-02 |
| O994_RS02680 | EF0781 |             | -1.6 | cold shock domain-contain protein | 3.2E-02 |

|              |        |             |      |                    |         |
|--------------|--------|-------------|------|--------------------|---------|
| O994_RS08550 | EF1991 | <i>cspC</i> | -1.4 | cold shock protein | 4.9E-02 |
|--------------|--------|-------------|------|--------------------|---------|

**Unclassified: metabolism**

|              |        |               |     |                                                               |         |
|--------------|--------|---------------|-----|---------------------------------------------------------------|---------|
| O994_RS13095 | EF0237 | <i>ecfAI</i>  | 1.9 | energy-coupling factor ABC transporter ATP-binding protein    | 1.4E-04 |
| O994_RS03385 | EF0934 |               | 1.5 | TatD family hydrolase                                         | 3.6E-02 |
| O994_RS04830 | EF1211 | <i>npr</i>    | 1.4 | NADH peroxidase                                               | 4.4E-02 |
| O994_RS04905 | EF1225 | <i>apbE</i>   | 3.6 | thiamin biosynthesis                                          | 2.8E-15 |
| O994_RS05105 | EF1268 |               | 2.5 | ATPase P: cation transporter E1-E2 family                     | 6.0E-23 |
| O994_RS05290 | EF1304 | <i>mgtA-2</i> | 2.8 | magnesium-translocating P-type ATPase                         | 2.0E-19 |
| O994_RS05370 | EF1311 |               | 1.8 | serine/threonine protein phosphatase                          | 2.1E-04 |
| O994_RS05530 | EF1348 |               | 1.6 | glucan 1,6- $\alpha$ -glucosidase                             | 4.9E-02 |
| O994_RS06860 | EF1612 | <i>pflA</i>   | 3.3 | pyruvate formate lyase-activating protein                     | 5.0E-04 |
| O994_RS07520 | EF1749 | <i>hprK</i>   | 1.4 | HPr kinase/phosphorylase                                      | 9.6E-02 |
| O994_RS09085 | EF2157 |               | 3.5 | DisA-like protein: putative cyclic di-AMP synthase            | 9.7E-41 |
| O994_RS10355 | EF2501 |               | 4.3 | arsenate reductase: oxidative stress                          | 5.1E-57 |
| O994_RS11295 | EF2739 | <i>ahpC</i>   | 2.6 | peroxiredoxin                                                 | 3.4E-07 |
| O994_RS01390 | EF3001 |               | 1.7 | protease synthase and sporulation negative regulatory protein | 1.9E-02 |
| O994_RS00210 | EF3255 |               | 2.3 | FAD:protein FMN transferase                                   | 5.0E-06 |
| O994_RS14275 | EF3303 |               | 4.0 | oleate hydratase                                              | 1.7E-54 |

|              |        |             |      |                                       |         |
|--------------|--------|-------------|------|---------------------------------------|---------|
| O994_RS05545 | EF1352 | <i>mgtA</i> | -3.6 | magnesium-translocating P-type ATPase | 1.9E-76 |
| O994_RS02575 | EF0758 |             | -3.2 | cadmium-translocating P-type ATPase   | 4.3E-22 |
| O994_RS01740 | EF1352 | <i>mgtA</i> | -2.3 | magnesium-translocating P-type ATPase | 3.5E-04 |
| O994_RS05790 | EF1400 |             | -3.3 | cadmium-translocating P-type ATPase   | 2.0E-21 |
| O994_RS01025 | EF3066 | <i>def</i>  | -2.3 | peptide deformylase                   | 9.1E-09 |

**Xenobiotics biodegradation and metabolism**

|              |        |  |      |                           |         |
|--------------|--------|--|------|---------------------------|---------|
| O994_RS10615 | EF2591 |  | 2.6  | glyoxalase                | 9.7E-13 |
| O994_RS02835 | EF0822 |  | -1.8 | HAD superfamily hydrolase | 3.3E-03 |

**JH2-2 Specific Genes**

|              |  |  |     |                      |         |
|--------------|--|--|-----|----------------------|---------|
| O994_RS03270 |  |  | 2.0 | hypothetical protein | 1.7E-05 |
| O994_RS04005 |  |  | 1.5 | hypothetical protein | 8.9E-03 |

|              |      |                                                        |         |
|--------------|------|--------------------------------------------------------|---------|
| O994_RS04850 | 1.7  | hypothetical protein                                   | 1.5E-02 |
| O994_RS05055 | 2.9  | GW domain-containing glycosaminoglycan-binding protein | 6.6E-11 |
| O994_RS06245 | 2.2  | hypothetical protein                                   | 1.8E-06 |
| O994_RS09570 | 5.0  | hypothetical protein                                   | 2.1E-43 |
| O994_RS13820 | 1.5  | ATP-binding cassette domain-containing protein         | 4.1E-02 |
| O994_RS14560 | 1.9  | hypothetical protein                                   | 2.0E-05 |
| O994_RS14570 | 2.1  | hypothetical protein                                   | 1.9E-04 |
| O994_RS14595 | 2.1  | GNAT family N-acetyltransferase                        | 7.1E-07 |
| O994_RS14745 | 2.1  | hypothetical protein                                   | 4.5E-06 |
| O994_RS14580 | -3.7 | hypothetical protein                                   | 1.1E-14 |
| O994_RS00785 | -1.5 | 23S ribosomal RNA                                      | 2.3E-02 |
| O994_RS00820 | -1.8 | hypothetical protein                                   | 5.2E-02 |
| O994_RS01545 | -1.4 | IS30-like element IS6770 family transposase            | 4.2E-02 |
| O994_RS01650 | -2.4 | hypothetical protein                                   | 2.8E-09 |
| O994_RS03080 | -3.3 | hypothetical protein                                   | 1.1E-07 |
| O994_RS03970 | -2.6 | hypothetical protein                                   | 1.8E-12 |
| O994_RS05795 | -3.3 | RusA family crossover junction endodeoxyribonuclease   | 9.1E-08 |
| O994_RS06415 | -2.0 | tRNA-Ile                                               | 6.2E-03 |
| O994_RS08540 | -1.9 | hypothetical protein                                   | 3.8E-03 |
| O994_RS08720 | -3.4 | hypothetical protein                                   | 1.1E-19 |
| O994_RS09165 | -2.0 | type IA DNA topoisomerase                              | 7.0E-03 |
| O994_RS12105 | -1.5 | multicopper oxidase domain-containing protein          | 2.4E-02 |
| O994_RS12845 | -1.5 | IS30-like element IS6770 family transposase            | 2.0E-02 |
| O994_RS14575 | -1.9 | ABC transporter permease                               | 1.6E-02 |
| O994_RS14615 | -1.8 | hypothetical protein                                   | 6.9E-03 |
| O994_RS14655 | -1.6 | IS30-like element IS6770 family transposase            | 7.8E-04 |
| O994_RS14660 | -2.9 | IS30-like element IS6770 family transposase            | 1.0E-20 |
| O994_RS14775 | -1.6 | IS30-like element IS6770 family transposase            | 5.4E-04 |

---

Table S3. Genes differentially expressed in *E. faecalis* wild-type in the presence versus absence of TXB.

| JH2-2 Locus Tag                     | V583 Gene | Gene Name     | F/C (log <sub>2</sub> ) | Gene Function                                                            | P <sub>adj</sub> |
|-------------------------------------|-----------|---------------|-------------------------|--------------------------------------------------------------------------|------------------|
| <b><u>Amino acid metabolism</u></b> |           |               |                         |                                                                          |                  |
| O994_RS13945                        | EF0037    | <i>proA</i>   | 3.5                     | $\gamma$ -glutamyl phosphate reductase                                   | 1.20E-38         |
| O994_RS13940                        | EF0038    | <i>proB</i>   | 5.8                     | $\gamma$ -glutamyl kinase                                                | 8.50E-47         |
| O994_RS12655                        | EF0368    |               | 3.0                     | aspartate kinase                                                         | 1.20E-10         |
| O994_RS01925                        | EF0634    | <i>tdc</i>    | 4.8                     | decarboxylase                                                            | 2.40E-84         |
| O994_RS03895                        | EF1037    | <i>aspD</i>   | 4.1                     | aspartate 4-decarboxylase                                                | 1.40E-52         |
| O994_RS04125                        | EF1063    |               | 3.2                     | hypothetical protein                                                     | 4.10E-11         |
| O994_RS04455                        | EF1133    | <i>dapD</i>   | 4.7                     | 2,3,4,5-tetrahydropyridine-2,6-dicarboxylate <i>N</i> -acetyltransferase | 1.00E-105        |
| O994_RS04460                        | EF1134    |               | 4.9                     | M20/M25/M40 family peptidase                                             | 2.40E-74         |
| O994_RS05390                        | EF1314    | <i>alaT</i>   | 3.4                     | alanine aminotransferase                                                 | 5.80E-41         |
| O994_RS06330                        | EF1504    | <i>lysA</i>   | 2.1                     | diaminopimelate decarboxylase                                            | 2.80E-06         |
| O994_RS06890                        | EF1618    | <i>eutH</i>   | 2.6                     | ethanolamine utilization protein                                         | 7.80E-02         |
| O994_RS07420                        | EF1731    | <i>aroD</i>   | 2.0                     | 3-dehydroquinase                                                         | 3.30E-06         |
| O994_RS07725                        | EF1793    | <i>ilvE</i>   | 3.0                     | branched-chain amino acid aminotransferase                               | 2.60E-23         |
| O994_RS09355                        | EF2214    |               | 6.2                     | glyoxylase                                                               | 1.10E-70         |
| O994_RS09615                        | EF2372    | <i>aspB</i>   | 1.9                     | aspartate aminotransferase                                               | 7.50E-06         |
| O994_RS11210                        | EF2721    | <i>sdhb-2</i> | 3.8                     | L-serine dehydratase, iron-sulfur-dependent subunit $\beta$              | 5.10E-35         |
| O994_RS11215                        | EF2722    | <i>sdha-2</i> | 3.7                     | iron-sulfur-dependent L-serine dehydratase subunit $\alpha$              | 1.90E-26         |
| O994_RS13675                        | EF0098    | <i>sdhB-1</i> | -4.8                    | L-serine dehydratase, iron-sulfur-dependent subunit $\beta$              | 5.10E-70         |
| O994_RS13670                        | EF0099    | <i>sdhA-1</i> | -5.1                    | iron-sulfur-dependent L-serine dehydratase subunit $\alpha$              | 1.20E-69         |
| O994_RS13645                        | EF0104    | <i>arcA</i>   | -5.6                    | arginine deaminase                                                       | 2.20E-44         |
| O994_RS13640                        | EF0105    | <i>argF-1</i> | -5.1                    | ornithine carbamoyltransferase                                           | 2.60E-35         |
| O994_RS13635                        | EF0106    | <i>arcC-1</i> | -4.8                    | carbamate kinase                                                         | 3.20E-32         |
| O994_RS06645                        | EF1566    | <i>aroA</i>   | -1.7                    | 3-phosphoshikimate 1-carboxyvinyltransferase                             | 2.90E-04         |
| O994_RS06650                        | EF1567    | <i>aroK</i>   | -2.1                    | shikimate kinase                                                         | 5.00E-07         |
| O994_RS06655                        | EF1568    |               | -2.5                    | prephenate dehydratase                                                   | 2.10E-08         |
| O994_RS06960                        | EF1634    | <i>pduU</i>   | -1.8                    | propanediol utilization protein                                          | 4.50E-02         |

|              |        |             |      |                                        |          |
|--------------|--------|-------------|------|----------------------------------------|----------|
| O994_RS06975 | EF1638 | <i>pduV</i> | -1.8 | propanediol utilization protein        | 3.40E-02 |
| O994_RS10505 | EF2568 |             | -5.3 | class V aminotransferase               | 1.40E-36 |
| O994_RS00525 | EF3178 |             | -1.9 | succinyl-diaminopimelate desuccinylase | 7.90E-06 |

### **Autolysis**

|              |        |  |      |                                                 |          |
|--------------|--------|--|------|-------------------------------------------------|----------|
| O994_RS13030 | EF0252 |  | 2.5  | <i>N</i> -acetylmuramoyl-L-alanine amidase      | 2.70E-13 |
| O994_RS12300 | EF0443 |  | 8.6  | LysM domain-containing protein                  | 3.50E-71 |
| O994_RS06415 | EF1518 |  | 8.3  | soluble lytic murein transglycosylase           | 1.60E-16 |
| O994_RS06420 | EF1518 |  | 7.8  | soluble lytic murein transglycosylase           | 1.00E-60 |
| O994_RS06730 | EF1583 |  | 1.9  | <i>N</i> -acetylmuramoyl-L-alanine amidase      | 8.50E-05 |
| O994_RS02775 | EF0799 |  | -1.9 | autolysin                                       | 9.30E-08 |
| O994_RS11610 | EF2863 |  | -2.9 | endo- $\beta$ - <i>N</i> -acetylglucosaminidase | 6.70E-13 |

### **Carbohydrate metabolism**

|              |        |              |      |                                                      |          |
|--------------|--------|--------------|------|------------------------------------------------------|----------|
| O994_RS13020 | EF0255 | <i>ldh-I</i> | 1.7  | L-lactate dehydrogenase                              | 8.40E-05 |
| O994_RS12670 | EF0365 |              | 1.7  | acyl-ACP thioesterase                                | 1.10E-02 |
| O994_RS03355 | EF0928 |              | 3.7  | glucose uptake protein                               | 1.30E-16 |
| O994_RS03730 | EF1004 | <i>zwf</i>   | 1.8  | glucose-6-phosphate 1-dehydrogenase                  | 3.30E-03 |
| O994_RS05845 | EF1411 |              | 2.2  | 6-phospho- $\beta$ -glucosidase                      | 2.50E-08 |
| O994_RS06790 | EF1597 | <i>katA</i>  | 4.2  | catalase/oxidase                                     | 5.80E-34 |
| O994_RS07000 | EF1644 | <i>lacX</i>  | 2.8  | aldolase 1 epimerase                                 | 3.10E-19 |
| O994_RS08160 | EF1907 |              | 2.6  | enoyl-CoA hydratase                                  | 9.90E-26 |
| O994_RS10350 | EF2500 |              | 2.8  | GcvH family protein                                  | 1.10E-12 |
| O994_RS00300 | EF3235 |              | 1.8  | gluconate kinase                                     | 8.70E-08 |
| O994_RS14030 | EF0020 | <i>mptAB</i> | -2.9 | PTS system mannose-specific transporter subunit IIAB | 4.50E-11 |
| O994_RS13795 | EF0069 | <i>nanE</i>  | -2.9 | <i>N</i> -acetylmannosamine-6-phosphate 2-epimerase  | 1.90E-13 |
| O994_RS13605 | EF0114 |              | -5.4 | glycosyl hydrolase                                   | 2.50E-67 |
| O994_RS13385 | EF0174 | <i>deoC</i>  | -2.5 | 2-deoxyribose-5-phosphate aldolase                   | 4.30E-17 |
| O994_RS13345 | EF0185 | <i>deoB</i>  | -1.7 | phosphopentomutase                                   | 3.40E-05 |
| O994_RS12860 | EF0271 | <i>arb</i>   | -3.3 | 6-phospho- $\beta$ -glucosidase                      | 2.60E-13 |
| O994_RS12855 | EF0272 |              | -2.5 | glycosyl hydrolase                                   | 6.00E-05 |

|              |        |               |      |                                                              |          |
|--------------|--------|---------------|------|--------------------------------------------------------------|----------|
| O994_RS12440 | EF0413 | <i>mtlD</i>   | -7.5 | mannitol-1-phosphate 5-dehydrogenase                         | 3.60E-14 |
| O994_RS09760 | EF0423 | <i>eda-1</i>  | -3.2 | keto-hydroxyglutarate-aldolase                               | 9.80E-10 |
| O994_RS12380 | EF0425 | <i>kduI-1</i> | -3.3 | 5-keto-4-deoxyuronate isomerase                              | 1.60E-10 |
| O994_RS01960 | EF0641 | <i>ldh2</i>   | -1.5 | L-lactate dehydrogenase                                      | 4.30E-02 |
| O994_RS02145 | EF0677 |               | -3.7 | phosphoglucomutase/phosphomannomutase                        | 1.40E-23 |
| O994_RS03485 | EF0955 |               | -1.7 | aldose 1-epimerase                                           | 2.90E-07 |
| O994_RS03490 | EF0956 | <i>pgmB</i>   | -1.5 | $\beta$ -phosphoglucomutase                                  | 1.40E-03 |
| O994_RS03495 | EF0957 |               | -1.4 | maltose phosphorylase                                        | 2.20E-02 |
| O994_RS03505 | EF0960 |               | -1.6 | endonuclease/exonuclease/phosphatase                         | 2.90E-04 |
| O994_RS04145 | EF1068 | <i>galM</i>   | -6.1 | aldose 1-epimerase                                           | 5.70E-69 |
| O994_RS04150 | EF1069 | <i>galK</i>   | -5.8 | galactokinase                                                | 1.20E-62 |
| O994_RS04155 | EF1070 | <i>galE-1</i> | -5.2 | UDP-glucose 4-epimerase                                      | 6.40E-46 |
| O994_RS04160 | EF1071 | <i>galT</i>   | -1.9 | galactose-1-phosphate uridylyltransferase                    | 1.80E-04 |
| O994_RS04330 | EF1108 | <i>lutA</i>   | -3.5 | oxidoreductase                                               | 2.70E-52 |
| O994_RS04335 | EF1109 | <i>lutB</i>   | -3.5 | iron-sulfur cluster binding protein                          | 1.20E-53 |
| O994_RS04340 | EF1110 | <i>lutC</i>   | -3.4 | lactate utilisation protein C                                | 2.30E-41 |
| O994_RS09520 | EF1213 | <i>alsS</i>   | -4.0 | acetolactate synthase                                        | 2.40E-12 |
| O994_RS01725 | EF1243 |               | -2.7 | glycosyl hydrolase                                           | 4.60E-05 |
| O994_RS05525 | EF1347 |               | -1.6 | glycosyl hydrolase                                           | 7.30E-04 |
| O994_RS05535 | EF1349 |               | -2.3 | glycosyl hydrolase                                           | 1.30E-12 |
| O994_RS05550 | EF1353 | <i>pdhA</i>   | -1.6 | pyruvate dehydrogenase complex E1 component subunit $\alpha$ | 1.10E-02 |
| O994_RS05555 | EF1354 | <i>pdhB</i>   | -1.5 | pyruvate dehydrogenase complex, E1 component subunit $\beta$ | 2.50E-02 |
| O994_RS05560 | EF1355 | <i>aceF</i>   | -1.5 | dihydrolipoamide acetyltransferase                           | 3.30E-02 |
| O994_RS06325 | EF1503 | <i>fbp</i>    | -2.1 | fructose-1,6-bisphosphatase                                  | 3.00E-04 |
| O994_RS06810 | EF1602 |               | -5.4 | glycosyl hydrolase                                           | 1.10E-08 |
| O994_RS07090 | EF1661 | <i>bkdD</i>   | -4.6 | branched-chain $\alpha$ -keto acid dehydrogenase             | 1.80E-12 |
| O994_RS07780 | EF1805 |               | -4.5 | glycosyl hydrolase                                           | 1.20E-15 |
| O994_RS07785 | EF1806 |               | -2.4 | hexose kinase                                                | 1.70E-05 |
| O994_RS01700 | EF1834 | <i>lacB</i>   | -6.5 | galactose-6-phosphate isomerase subunit                      | 6.70E-70 |
| O994_RS01695 | EF1835 | <i>lacA</i>   | -6.5 | galactose-6-phosphate isomerase subunit                      | 2.60E-84 |
| O994_RS08210 | EF1918 | <i>pglA</i>   | -1.6 | hypothetical protein                                         | 1.30E-02 |

|              |        |              |      |                                                                |           |
|--------------|--------|--------------|------|----------------------------------------------------------------|-----------|
| O994_RS08345 | EF1950 |              | -4.6 | MocD family protein                                            | 3.20E-21  |
| O994_RS08350 | EF1951 |              | -7.6 | phosphosugar-binding protein                                   | 7.30E-17  |
| O994_RS08400 | EF1962 | <i>tpiA</i>  | -1.7 | triosephosphate isomerase                                      | 4.00E-04  |
| O994_RS08405 | EF1963 | <i>pgk</i>   | -1.5 | phosphoglycerate kinase                                        | 8.50E-03  |
| O994_RS08410 | EF1964 | <i>gap-2</i> | -1.8 | glyceraldehyde-3-phosphate dehydrogenase                       | 1.10E-06  |
| O994_RS09055 | EF2151 | <i>glmS</i>  | -3.0 | glucosamine--fructose-6-phosphate aminotransferase             | 5.00E-29  |
| O994_RS10045 | EF2435 |              | -2.3 | PTS system transporter subunit IIBC                            | 2.20E-05  |
| O994_RS10285 | EF2487 | <i>glf</i>   | -4.8 | UDP-galactopyranose mutase                                     | 5.00E-79  |
| O994_RS10460 | EF2559 |              | -5.2 | pyruvate flavodoxin/ferredoxin oxidoreductase family protein   | 3.50E-45  |
| O994_RS12005 | EF2961 | <i>rbsK</i>  | -3.8 | ribokinase                                                     | 4.30E-27  |
| O994_RS01365 | EF3006 |              | -3.4 | glucose-6-phosphate 1-dehydrogenase family protein             | 2.50E-13  |
| O994_RS01165 | EF3037 | <i>pepA</i>  | -2.0 | glutamyl aminopeptidase                                        | 8.70E-08  |
| O994_RS00720 | EF3135 | <i>uxuA</i>  | -4.9 | mannonate dehydratase                                          | 4.80E-21  |
| O994_RS00690 | EF3141 |              | -7.5 | D-isomer specific 2-hydroxyacid dehydrogenase family protein   | 3.40E-10  |
| O994_RS00685 | EF3142 | <i>gnd</i>   | -8.7 | 6-phosphogluconate dehydrogenase                               | 2.40E-13  |
| O994_RS00620 | EF3157 |              | -3.8 | glycosyl hydrolase                                             | 1.00E-29  |
| O994_RS00615 | EF3158 | <i>pgmB</i>  | -3.5 | $\beta$ -phosphoglucomutase                                    | 6.70E-15  |
| O994_RS00375 | EF3210 |              | -8.2 | PTS system transporter subunit IIA                             | 2.20E-50  |
| O994_RS14240 | EF3310 |              | -8.7 | sorbitol-6-phosphate 2-dehydrogenase                           | 3.30E-18  |
| O994_RS14170 | EF3324 |              | -6.3 | sodium ion-translocating decarboxylase subunit $\beta$         | 6.60E-101 |
| O994_RS14165 | EF3325 |              | -6.8 | acetyl-CoA carboxylase biotin carboxyl carrier protein subunit | 1.90E-90  |

### **Cellular Community**

|              |        |               |      |                                                        |          |
|--------------|--------|---------------|------|--------------------------------------------------------|----------|
| O994_RS01930 | EF0635 |               | 4.6  | amino acid permease                                    | 1.50E-54 |
| O994_RS01150 | EF3041 |               | 3.6  | pheromone binding protein                              | 2.30E-31 |
| O994_RS00205 | EF3256 |               | 1.6  | pheromone cAD1 lipoprotein                             | 2.60E-03 |
| O994_RS07790 | EF1807 | <i>lacD</i>   | -1.7 | tagatose 1,6-diphosphate aldolase                      | 9.80E-02 |
| O994_RS01710 | EF1807 | <i>lacD-2</i> | -5.6 | tagatose 1,6-diphosphate aldolase                      | 4.80E-17 |
| O994_RS00880 | EF3106 | <i>opp2A</i>  | -3.2 | oligopeptide ABC transporter substrate-binding protein | 2.00E-50 |
| O994_RS00875 | EF3107 | <i>opp2C</i>  | -2.8 | oligopeptide ABC transporter permease                  | 7.90E-31 |

### **Drug Resistance: antimicrobial**



|                                                |        |               |      |                                                               |          |
|------------------------------------------------|--------|---------------|------|---------------------------------------------------------------|----------|
| O994_RS06490                                   | EF1534 |               | 3.3  | cyclophilin type peptidyl-prolyl cis-trans isomerase          | 2.50E-29 |
| O994_RS11105                                   | EF2698 | <i>telA</i>   | 3.8  | tellurite resistance protein                                  | 1.20E-58 |
| O994_RS06320                                   | EF1502 |               | -2.4 | $\beta$ -lactamase                                            | 1.50E-05 |
| <b><u>Energy Metabolism</u></b>                |        |               |      |                                                               |          |
| O994_RS06270                                   | EF1492 |               | 3.6  | V-type ATPase subunit F                                       | 9.20E-51 |
| O994_RS06275                                   | EF1493 |               | 3.1  | V-type ATP synthase subunit I                                 | 2.70E-32 |
| O994_RS06280                                   | EF1494 |               | 2.5  | V-type ATP synthase subunit K                                 | 8.00E-16 |
| O994_RS06285                                   | EF1495 |               | 2.4  | V-type ATPase subunit E                                       | 8.70E-14 |
| O994_RS06290                                   | EF1496 |               | 2.2  | V-type ATPase subunit C                                       | 6.10E-12 |
| O994_RS06295                                   | EF1497 |               | 1.9  | V-type ATP synthase subunit F                                 | 7.20E-07 |
| O994_RS06300                                   | EF1498 |               | 1.9  | V-type ATP synthase subunit A                                 | 9.70E-08 |
| O994_RS06305                                   | EF1499 |               | 1.7  | V-type ATP synthase subunit B                                 | 1.60E-05 |
| O994_RS06310                                   | EF1500 |               | 1.7  | V-type ATP synthase subunit D                                 | 1.90E-04 |
| O994_RS07325                                   | EF1711 |               | 2.4  | carbonic anhydrase                                            | 6.90E-08 |
| O994_RS10465                                   | EF2560 | <i>gltA</i>   | -5.0 | oxidoreductase                                                | 1.10E-34 |
| O994_RS10685                                   | EF2607 | <i>atpC</i>   | -1.9 | F <sub>0</sub> F <sub>1</sub> ATP synthase subunit $\epsilon$ | 1.10E-06 |
| O994_RS10690                                   | EF2608 | <i>atpD</i>   | -1.8 | F <sub>0</sub> F <sub>1</sub> ATP synthase subunit $\beta$    | 2.10E-05 |
| O994_RS10695                                   | EF2609 | <i>atpG</i>   | -1.4 | F <sub>0</sub> F <sub>1</sub> ATP synthase subunit $\gamma$   | 6.70E-02 |
| <b><u>Folding, sorting and degradation</u></b> |        |               |      |                                                               |          |
| O994_RS04345                                   | EF1111 |               | 2.7  | signal peptidase I                                            | 2.70E-13 |
| O994_RS06545                                   | EF1545 | <i>recQ-1</i> | 2.8  | ATP-dependent DNA helicase                                    | 2.90E-17 |
| O994_RS07010                                   | EF1646 | <i>hslU</i>   | 3.4  | ATP-dependent protease                                        | 5.10E-35 |
| O994_RS07015                                   | EF1647 | <i>hslV</i>   | 3.9  | ATP-dependent protease                                        | 1.00E-40 |
| O994_RS07170                                   | EF1678 |               | 1.5  | signal peptidase I                                            | 4.40E-02 |
| O994_RS07270                                   | EF1700 | <i>ffh</i>    | 1.6  | signal recognition particle protein                           | 7.90E-04 |
| O994_RS07385                                   | EF1723 | <i>lspA</i>   | 1.5  | lipoprotein signal peptidase                                  | 3.50E-02 |
| O994_RS07590                                   | EF1763 | <i>secA</i>   | 1.8  | preprotein translocase subunit                                | 5.00E-06 |
| O994_RS08950                                   | EF2070 | <i>mnmA</i>   | 2.1  | tRNA-specific 2-thiouridylase                                 | 7.10E-08 |
| O994_RS09650                                   | EF2380 | <i>rseP</i>   | 2.5  | regulator of $\sigma$ E protease                              | 1.80E-16 |

|              |        |             |      |                                       |          |
|--------------|--------|-------------|------|---------------------------------------|----------|
| O994_RS11250 | EF2730 | <i>secE</i> | 3.5  | preprotein translocase subunit        | 9.40E-12 |
| O994_RS11970 | EF2934 | <i>thiI</i> | 1.8  | thiazole biosynthesis protein         | 1.60E-02 |
| O994_RS13155 | EF0227 | <i>secY</i> | -3.5 | preprotein translocase subunit        | 9.70E-28 |
| O994_RS08395 | EF1961 | <i>eno</i>  | -1.5 | enolase                               | 2.00E-02 |
| O994_RS14135 | EF3331 |             | -1.4 | pheromone cCF10 precursor/lipoprotein | 3.10E-02 |
| O994_RS08395 | EF1961 | <i>eno</i>  | -1.5 | enolase                               | 2.00E-02 |
| O994_RS14135 | EF3331 |             | -1.4 | pheromone cCF10 precursor/lipoprotein | 3.10E-02 |

### **Glycan biosynthesis and metabolism**

|              |        |               |     |                                                                  |           |
|--------------|--------|---------------|-----|------------------------------------------------------------------|-----------|
| O994_RS02100 | EF0668 | <i>murE</i>   | 2.2 | UDP- <i>N</i> -acetylmuramoylalanyl-D-glutamate--L-lysine ligase | 9.10E-08  |
| O994_RS02105 | EF0669 |               | 3.2 | polysaccharide biosynthesis protein                              | 5.70E-28  |
| O994_RS02160 | EF0680 |               | 5.7 | penicillin-binding protein 2A                                    | 1.90E-206 |
| O994_RS02520 | EF0746 | <i>pbp(6)</i> | 4.9 | penicillin binding protein                                       | 5.10E-68  |
| O994_RS02760 | EF0796 |               | 4.2 | type 2 phosphatidic acid phosphatase                             | 1.40E-25  |
| O994_RS03665 | EF0991 | <i>pbpC</i>   | 2.2 | penicillin-binding protein C                                     | 1.90E-11  |
| O994_RS03845 | EF1027 | <i>mprF</i>   | 3.4 | bifunctional lysylphosphatidylglycerol flippase/synthetase       | 2.20E-34  |
| O994_RS04525 | EF1148 | <i>pbp1A</i>  | 3.3 | penicillin-binding protein 1A                                    | 5.70E-28  |
| O994_RS04630 | EF1169 | <i>murAB</i>  | 1.7 | UDP- <i>N</i> -acetylglucosamine 1-carboxyvinyltransferase       | 4.70E-02  |
| O994_RS05270 | EF1300 |               | 4.8 | putative lipid II flippase                                       | 6.10E-21  |
| O994_RS06550 | EF1546 |               | 2.8 | LysM domain-containing protein                                   | 6.60E-31  |
| O994_RS07470 | EF1740 | <i>pbp1B</i>  | 3.1 | penicillin-binding protein 1B                                    | 3.70E-22  |
| O994_RS08165 | EF1908 | <i>murC</i>   | 2.0 | UDP- <i>N</i> -acetylmuramate--L-alanine ligase                  | 6.00E-05  |
| O994_RS08320 | EF1945 |               | 2.3 | putative polyglycerophosphate lipoteichoic acids                 | 7.50E-06  |
| O994_RS09050 | EF2150 |               | 1.9 | FemAB family protein                                             | 7.50E-08  |
| O994_RS09150 | EF2170 | <i>epaX</i>   | 2.3 | glycosyl transferase group 2 family protein                      | 2.30E-07  |
| O994_RS09155 | EF2171 | <i>epaW</i>   | 3.1 | dTDP-4-dehydro-6-deoxy-D-glucose                                 | 1.20E-15  |
| O994_RS09160 | EF2172 | <i>ispD</i>   | 4.3 | 2-C-methyl-D-erythritol 4-phosphate cytidyltransferase           | 7.60E-48  |
| O994_RS09245 | EF2192 | <i>epaG</i>   | 2.3 | dTDP-glucose 4,6-dehydratase                                     | 8.50E-11  |
| O994_RS09250 | EF2193 | <i>epaF</i>   | 2.8 | dTDP-4-dehydrorhamnose 3,5-epimerase                             | 4.60E-21  |
| O994_RS09255 | EF2194 | <i>epaE</i>   | 2.9 | glucose-1-phosphate thymidyltransferase                          | 4.80E-27  |
| O994_RS09260 | EF2195 | <i>epaD</i>   | 3.1 | $\alpha$ -1,3-L-rhamnosyltransferase                             | 6.60E-21  |

|                                |        |                |      |                                                                                  |           |
|--------------------------------|--------|----------------|------|----------------------------------------------------------------------------------|-----------|
| O994_RS09265                   | EF2196 | <i>epaC</i>    | 3.4  | glycosyl transferase group 2 family protein                                      | 7.30E-29  |
| O994_RS09270                   | EF2197 | <i>epaB</i>    | 3.7  | $\alpha$ -D-GlcNAc-pyrophosphate polyprenol, $\alpha$ -3-L-rhamnosyl transferase | 4.90E-34  |
| O994_RS09275                   | EF2198 | <i>tagO</i>    | 2.4  | glycosyl transferase family protein                                              | 1.10E-15  |
| O994_RS10065                   | EF2439 | <i>uppP</i>    | 2.0  | UDP pyrophosphate phosphatase                                                    | 1.90E-03  |
| O994_RS10235                   | EF2476 | <i>pbp4(5)</i> | 2.0  | penicillin-binding protein 4                                                     | 2.20E-08  |
| O994_RS10585                   | EF2585 | <i>murT</i>    | 4.9  | mur ligase                                                                       | 7.50E-107 |
| O994_RS10590                   | EF2586 | <i>gatD</i>    | 4.8  | glutamine amidotransferase                                                       | 8.50E-65  |
| O994_RS10675                   | EF2605 | <i>murAA</i>   | 2.2  | UDP-N-acetylglucosamine 1-carboxyvinyltransferase 1                              | 2.30E-09  |
| O994_RS10780                   | EF2627 |                | 2.3  | teichoic acid glycosylation protein                                              | 5.50E-04  |
| O994_RS10920                   | EF2658 |                | 4.9  | FemAB family protein                                                             | 5.40E-77  |
| O994_RS11265                   | EF2733 | <i>murB</i>    | 2.4  | UDP-N-acetylenolpyruvoylglucosamine reductase                                    | 3.80E-15  |
| O994_RS11345                   | EF2750 | <i>dltX</i>    | 5.6  | teichoic acid D-ala incorporation-associated protein                             | 4.70E-102 |
| O994_RS11580                   | EF2857 | <i>pbp2B</i>   | 3.5  | penicillin-binding protein 2B                                                    | 2.20E-56  |
| O994_RS11595                   | EF2860 | <i>pbp</i>     | 4.6  | putative peptidoglycan transpeptidase                                            | 2.40E-77  |
| O994_RS11880                   | EF2915 | <i>mltG</i>    | 3.1  | mltG-like protein                                                                | 1.00E-35  |
| O994_RS01055                   | EF3060 | <i>sala</i>    | 2.8  | peptidoglycan DL-endopeptidase                                                   | 2.70E-11  |
| O994_RS07305                   | EF1707 |                | -1.8 | glycosyl hydrolase                                                               | 3.20E-02  |
| O994_RS10070                   | EF2440 |                | -4.7 | celC-like protein                                                                | 2.60E-26  |
| O994_RS14400                   | EF2489 | <i>cspG</i>    | -4.4 | MurB family protein                                                              | 2.00E-63  |
| <b><u>Lipid Metabolism</u></b> |        |                |      |                                                                                  |           |
| O994_RS12805                   | EF0282 | <i>fabI</i>    | 1.5  | enoyl-ACP reductase                                                              | 2.80E-03  |
| O994_RS12800                   | EF0283 | <i>fabF</i>    | 1.5  | 3-oxoacyl-ACP synthase                                                           | 4.80E-03  |
| O994_RS05090                   | EF1264 |                | 3.7  | sulfatase                                                                        | 9.00E-57  |
| O994_RS06665                   | EF1570 |                | 2.6  | DegV family protein                                                              | 2.00E-11  |
| O994_RS07510                   | EF1747 | <i>gpsA</i>    | 1.7  | NAD(P)H-dependent glycerol-3-phosphate dehydrogenase                             | 2.10E-04  |
| O994_RS07815                   | EF1813 |                | 2.9  | sulfatase                                                                        | 3.20E-10  |
| O994_RS08150                   | EF1904 |                | 3.0  | glycerophosphoryl diester phosphodiesterase family protein                       | 2.40E-13  |
| O994_RS10320                   | EF2494 | <i>cdsA</i>    | 3.0  | phosphatidate cytidyltransferase                                                 | 3.90E-22  |
| O994_RS11070                   | EF2691 | <i>plsC</i>    | 2.5  | 1-acyl-sn-glycerol-3-phosphate acyltransferase                                   | 1.70E-09  |
| O994_RS11685                   | EF2879 | <i>accB</i>    | 1.4  | acetyl-CoA carboxylase, biotin carboxyl carrier protein                          | 2.40E-02  |

|                                  |        |               |      |                                                         |          |
|----------------------------------|--------|---------------|------|---------------------------------------------------------|----------|
| O994_RS11690                     | EF2880 | <i>fabF-2</i> | 1.6  | 3-oxoacyl-ACP synthase                                  | 5.40E-03 |
| O994_RS11695                     | EF2881 | <i>fabG</i>   | 2.2  | 3-ketoacyl-ACP reductase                                | 1.60E-08 |
| O994_RS11700                     | EF2882 | <i>fabD</i>   | 2.6  | ACP S-malonyltransferase                                | 6.10E-17 |
| O994_RS11705                     | EF2883 | <i>fabK</i>   | 3.3  | enoyl-ACP reductase                                     | 5.90E-34 |
| O994_RS11710                     | EF2884 | <i>acpP</i>   | 1.9  | acyl carrier protein                                    | 2.70E-08 |
| O994_RS11715                     | EF2885 | <i>fabH</i>   | 2.3  | 3-oxoacyl-ACP synthase III                              | 2.00E-16 |
| O994_RS11740                     | EF2891 | <i>bgsA</i>   | 2.1  | glycosyl transferase family protein                     | 6.30E-09 |
| O994_RS02430                     | EF0727 |               | -1.8 | lipid kinase                                            | 1.10E-06 |
| O994_RS05575                     | EF1358 | <i>gldA</i>   | -4.6 | glycerol dehydrogenase                                  | 1.30E-43 |
| O994_RS05580                     | EF1359 | <i>dhaM</i>   | -4.3 | dihydroxyacetone kinase                                 | 1.50E-35 |
| O994_RS04675                     | EF1359 |               | -4.5 | hypothetical protein                                    | 9.70E-43 |
| O994_RS05585                     | EF1360 | <i>dhaK</i>   | -4.0 | dihydroxyacetone kinase                                 | 1.30E-31 |
| O994_RS05590                     | EF1361 | <i>dhaL</i>   | -4.0 | dihydroxyacetone kinase                                 | 4.60E-30 |
| O994_RS08255                     | EF1928 | <i>glpO</i>   | -4.0 | $\alpha$ -glycerophosphate oxidase                      | 1.70E-27 |
| O994_RS08260                     | EF1929 | <i>glpK</i>   | -4.5 | glycerol kinase                                         | 4.10E-32 |
| O994_RS10860                     | EF2646 |               | -4.9 | glycerate kinase                                        | 7.00E-07 |
| O994_RS01370                     | EF3005 |               | -3.2 | choloylglycine hydrolase                                | 7.00E-24 |
| <b><u>Membrane transport</u></b> |        |               |      |                                                         |          |
| O994_RS13970                     | EF0032 |               | 2.6  | putative copper transporter                             | 1.40E-18 |
| O994_RS13100                     | EF0238 | <i>cbiO</i>   | 1.9  | cobalt transporter ATP-binding protein                  | 2.60E-04 |
| O994_RS12425                     | EF0417 |               | 3.2  | ABC transporter permease                                | 2.10E-29 |
| O994_RS12420                     | EF0418 |               | 2.3  | ABC transporter ATP-binding protein                     | 5.50E-14 |
| O994_RS12290                     | EF0455 |               | 1.6  | PTS system transporter subunit IIC                      | 6.70E-03 |
| O994_RS01935                     | EF0636 | <i>nhaC</i>   | 3.9  | Na <sup>+</sup> :H <sup>+</sup> antiporter, NhaC family | 2.20E-31 |
| O994_RS02265                     | EF0700 |               | 2.2  | HlyC/CorC family transporter                            | 9.30E-08 |
| O994_RS02485                     | EF0739 | <i>pnuC</i>   | 3.5  | nicotinamide riboside transporter                       | 1.80E-27 |
| O994_RS02590                     | EF0761 |               | 2.6  | amino acid ABC transporter amino acid-binding/permease  | 3.40E-13 |
| O994_RS03025                     | EF0859 |               | 3.2  | cation efflux family protein                            | 4.50E-09 |
| O994_RS03085                     | EF0872 |               | 1.8  | KUP system potassium uptake protein                     | 7.90E-05 |
| O994_RS04465                     | EF1135 | <i>mscS</i>   | 2.2  | moderate conductance mechanosensitive channel           | 6.00E-08 |

|              |        |               |      |                                                            |           |
|--------------|--------|---------------|------|------------------------------------------------------------|-----------|
| O994_RS04770 | EF1198 |               | 5.0  | ABC transporter permease                                   | 1.40E-41  |
| O994_RS04775 | EF1199 |               | 4.9  | phosphate ABC transporter: substrate-binding protein       | 7.60E-38  |
| O994_RS05495 | EF1341 | <i>macA</i>   | 4.0  | ABC transporter ATP-binding protein/permease               | 2.10E-34  |
| O994_RS13465 | EF1408 |               | 2.7  | ABC transporter ATP-binding protein                        | 7.70E-11  |
| O994_RS06525 | EF1541 |               | 2.2  | riboflavin transporter                                     | 3.70E-06  |
| O994_RS07140 | EF1672 |               | 5.3  | putative ABC transport system permease protein             | 3.40E-64  |
| O994_RS07145 | EF1673 |               | 5.4  | putative ABC transport system ATP-binding protein          | 1.70E-59  |
| O994_RS07560 | EF1757 | <i>pstA</i>   | 1.6  | phosphate ABC transporter permease                         | 1.40E-02  |
| O994_RS07565 | EF1758 | <i>pstC</i>   | 2.7  | phosphate ABC transporter permease                         | 1.70E-13  |
| O994_RS07580 | EF1761 | <i>ftsE</i>   | 1.7  | cell division ATP-binding protein                          | 6.10E-03  |
| O994_RS07820 | EF1814 |               | 3.9  | drug resistance transporter EmrB/QacA family protein       | 4.70E-12  |
| O994_RS08840 | EF2047 |               | 3.3  | basic amino acid/polyamine antiporter, APA family          | 3.40E-11  |
| O994_RS08940 | EF2068 |               | 2.2  | multidrug efflux MFS transporter                           | 1.40E-05  |
| O994_RS07480 | EF2074 |               | 3.6  | ABC transporter ATP-binding protein                        | 2.00E-10  |
| O994_RS09215 | EF2183 |               | 1.9  | ABC transporter permease                                   | 7.20E-03  |
| O994_RS10060 | EF2438 |               | 2.8  | PTS system transporter subunit IIA                         | 1.10E-17  |
| O994_RS10175 | EF2460 | <i>typA</i>   | 2.8  | GTP-binding protein                                        | 7.70E-14  |
| O994_RS10340 | EF2498 | <i>metN-2</i> | 2.2  | ABC transporter ATP-binding protein                        | 4.00E-06  |
| O994_RS10825 | EF2639 |               | 2.7  | multidrug ABC transporter ATP-binding protein              | 2.90E-13  |
| O994_RS11205 | EF2720 |               | 2.0  | ABC transporter ATP-binding protein                        | 5.60E-07  |
| O994_RS11855 | EF2910 | <i>trk</i>    | 1.4  | potassium uptake transporter                               | 6.30E-02  |
| O994_RS11975 | EF2935 |               | 2.6  | xanthine/uracil permeases family protein                   | 5.50E-07  |
| O994_RS01460 | EF2985 |               | 5.2  | putative ABC transport system permease protein             | 2.90E-90  |
| O994_RS01455 | EF2986 |               | 5.5  | putative ABC transport system ATP-binding protein          | 4.40E-62  |
| O994_RS01450 | EF2987 |               | 6.3  | HlyD family efflux transporter periplasmic adaptor subunit | 1.70E-101 |
| O994_RS01280 | EF3015 | <i>sstT</i>   | 1.9  | serine/threonine transporter                               | 7.20E-04  |
| O994_RS01010 | EF3069 |               | 3.6  | formate/nitrite transporter family protein                 | 8.40E-09  |
| O994_RS14035 | EF0019 | <i>mptA</i>   | -2.3 | PTS system transporter subunit IIB                         | 6.70E-06  |
| O994_RS14025 | EF0021 | <i>mptC</i>   | -3.1 | PTS system mannose-specific transporter subunit IIC        | 2.00E-12  |
| O994_RS14020 | EF0022 | <i>mptD</i>   | -3.1 | PTS system mannose-specific transporter subunit IID        | 1.20E-12  |

|              |        |               |      |                                                                 |           |
|--------------|--------|---------------|------|-----------------------------------------------------------------|-----------|
| O994_RS13625 | EF0108 | <i>arcD</i>   | -3.7 | C4-dicarboxylate transporter                                    | 5.90E-15  |
| O994_RS13375 | EF0176 |               | -2.5 | hypothetical protein                                            | 6.40E-17  |
| O994_RS13370 | EF0177 |               | -2.7 | hypothetical protein                                            | 3.40E-28  |
| O994_RS13365 | EF0178 |               | -2.9 | ABC transporter ATP-binding protein                             | 1.30E-20  |
| O994_RS13360 | EF0179 |               | -2.8 | ABC transporter permease                                        | 7.70E-21  |
| O994_RS13355 | EF0180 |               | -2.7 | ABC transporter permease                                        | 2.40E-19  |
| O994_RS12865 | EF0270 |               | -4.3 | PTS system $\beta$ -glucoside-specific transporter subunit IIBC | 7.60E-26  |
| O994_RS12575 | EF0385 |               | -6.0 | major facilitator family transporter                            | 7.60E-13  |
| O994_RS12490 | EF0402 | <i>nhaC-1</i> | -2.2 | Na <sup>+</sup> /H <sup>+</sup> antiporter                      | 1.10E-04  |
| O994_RS12450 | EF0411 |               | -9.1 | PTS system mannitol-specific transporter subunit IIBC           | 4.00E-135 |
| O994_RS12445 | EF0412 | <i>mltF</i>   | -8.1 | PTS system mannitol-specific transporter subunit IIA            | 2.90E-17  |
| O994_RS01540 | EF0420 |               | -1.7 | drug resistance transporter EmrB/QacA family protein            | 4.70E-02  |
| O994_RS02205 | EF0688 |               | -1.4 | ABC-2 type transport system ATP-binding protein                 | 7.80E-02  |
| O994_RS02210 | EF0689 |               | -1.7 | ABC-2 type transport system permease protein                    | 1.40E-03  |
| O994_RS02705 | EF0785 |               | -1.8 | drug resistance transporter EmrB/QacA family protein            | 3.40E-04  |
| O994_RS03075 | EF0871 |               | -2.4 | cation transporter E <sub>1</sub> -E <sub>2</sub> family ATPase | 4.30E-13  |
| O994_RS03405 | EF0938 | <i>ugpC</i>   | -4.8 | sugar ABC transporter ATP-binding protein                       | 3.80E-39  |
| O994_RS03500 | EF0958 |               | -2.2 | PTS system transporter subunit IIBC                             | 1.40E-12  |
| O994_RS03765 | EF1012 |               | -5.9 | PTS system transporter subunit IIB                              | 1.40E-03  |
| O994_RS03770 | EF1013 |               | -6.7 | PTS system transporter subunit IIC                              | 7.80E-07  |
| O994_RS03790 | EF1017 |               | -3.3 | PTS system transporter subunit IIB                              | 9.90E-02  |
| O994_RS03795 | EF1018 |               | -3.6 | PTS system transporter subunit IIA                              | 6.80E-02  |
| O994_RS01715 | EF1018 |               | -4.7 | PTS system transporter subunit IIA                              | 3.40E-23  |
| O994_RS03800 | EF1019 |               | -3.5 | PTS system transporter subunit IIC                              | 9.70E-02  |
| O994_RS04095 | EF1057 | <i>mntH2</i>  | -2.3 | manganese transport protein                                     | 3.50E-06  |
| O994_RS04295 | EF1100 |               | -2.3 | ABC transporter ATP-binding protein/permease                    | 6.10E-05  |
| O994_RS01720 | EF1160 | <i>celB</i>   | -3.4 | PTS system cellobiose-specific transporter subunit IIC          | 2.30E-10  |
| O994_RS04585 | EF1160 |               | -3.5 | PTS system cellobiose-specific transporter subunit IIC          | 3.50E-11  |
| O994_RS04940 | EF1232 |               | -4.7 | ABC transporter permease                                        | 7.30E-17  |
| O994_RS04945 | EF1233 |               | -4.6 | ABC transporter permease                                        | 6.90E-15  |
| O994_RS04950 | EF1234 |               | -4.2 | ABC transporter substrate-binding protein                       | 1.30E-27  |

|              |        |             |      |                                                           |          |
|--------------|--------|-------------|------|-----------------------------------------------------------|----------|
| O994_RS05835 | EF1409 |             | -1.4 | ABC transporter permease                                  | 7.60E-02 |
| O994_RS06380 | EF1516 |             | -2.2 | PTS system transporter subunit IIABC                      | 8.70E-07 |
| O994_RS06470 | EF1529 |             | -2.6 | PTS system transporter subunit IIC                        | 1.80E-07 |
| O994_RS06805 | EF1601 |             | -4.6 | PTS system transporter subunit IIABC                      | 9.00E-23 |
| O994_RS06980 | EF1639 |             | -2.1 | iron ABC transporter ATP-binding protein                  | 2.20E-05 |
| O994_RS06985 | EF1639 | <i>btuC</i> | -2.5 | iron ABC transporter ATP-binding protein                  | 6.80E-09 |
| O994_RS06990 | EF1641 |             | -2.3 | iron ABC transporter iron compound-binding protein        | 2.50E-06 |
| O994_RS07770 | EF1803 |             | -3.7 | PTS system transporter subunit IIC                        | 1.10E-12 |
| O994_RS09755 | EF1836 |             | -3.1 | PTS system transporter subunit IIA                        | 3.50E-09 |
| O994_RS09745 | EF1838 |             | -2.3 | PTS system transporter subunit IIC                        | 4.70E-05 |
| O994_RS08220 | EF1920 |             | -5.2 | C4-dicarboxylate transporter, DcuC family                 | 2.00E-24 |
| O994_RS08250 | EF1927 | <i>glpF</i> | -3.8 | glycerol uptake facilitator protein                       | 6.70E-18 |
| O994_RS08355 | EF1952 |             | -6.4 | PTS system transporter subunit IID                        | 3.60E-17 |
| O994_RS08360 | EF1953 |             | -7.1 | PTS system transporter subunit IIC                        | 7.30E-24 |
| O994_RS08890 | EF2058 | <i>cydC</i> | -2.0 | transport ATP-binding protein                             | 6.20E-09 |
| O994_RS08895 | EF2059 | <i>cydD</i> | -1.8 | transport ATP-binding protein                             | 3.50E-06 |
| O994_RS09350 | EF2213 |             | -6.3 | PTS system transporter subunit IIBC                       | 3.00E-17 |
| O994_RS09390 | EF2221 |             | -6.2 | ABC transporter substrate-binding protein                 | 5.80E-65 |
| O994_RS09395 | EF2222 |             | -6.7 | ABC transporter permease                                  | 8.30E-75 |
| O994_RS09400 | EF2223 |             | -7.6 | ABC transporter permease                                  | 1.50E-77 |
| O994_RS10080 | EF2442 | <i>PiT</i>  | -5.2 | inorganic phosphate transporter, PiT family               | 2.00E-45 |
| O994_RS10275 | EF2485 | <i>cpsK</i> | -4.4 | ABC transporter permease                                  | 1.30E-35 |
| O994_RS10280 | EF2486 | <i>cpsJ</i> | -4.5 | ABC transporter ATP-binding protein                       | 3.20E-64 |
| O994_RS10665 | EF2602 |             | -1.5 | PTS glucitol/sorbitol transporter subunit IIA             | 1.70E-02 |
| O994_RS10865 | EF2647 | <i>grtP</i> | -5.9 | gluconate:H <sup>+</sup> symporter, GntP family           | 4.10E-42 |
| O994_RS10960 | EF2668 | <i>mgtE</i> | -1.5 | magnesium transporter                                     | 1.70E-02 |
| O994_RS11820 | EF2903 |             | -2.4 | multiple sugar transport system substrate-binding protein | 3.00E-12 |
| O994_RS11830 | EF2905 |             | -1.6 | multiple sugar transport system permease protein          | 8.20E-02 |
| O994_RS11995 | EF2959 | <i>rbsU</i> | -2.7 | putative ribose uptake protein                            | 8.20E-11 |
| O994_RS12000 | EF2960 | <i>rbsD</i> | -3.5 | D-ribose pyranase                                         | 6.30E-19 |
| O994_RS12020 | EF2964 | <i>ulaA</i> | -7.3 | PTS system ascorbate-specific transporter subunit IIC     | 2.40E-78 |

|              |        |             |      |                                                        |           |
|--------------|--------|-------------|------|--------------------------------------------------------|-----------|
| O994_RS12025 | EF2965 |             | -8.2 | hypothetical protein                                   | 9.20E-60  |
| O994_RS09765 | EF2986 |             | -4.1 | ABC transporter ATP-binding protein                    | 9.40E-27  |
| O994_RS01360 | EF3007 |             | -3.2 | chloride ion channel protein                           | 4.10E-19  |
| O994_RS01205 | EF3029 |             | -4.7 | PTS system transporter subunit IID                     | 1.40E-16  |
| O994_RS01200 | EF3030 |             | -4.3 | PTS system transporter subunit IIC                     | 3.20E-17  |
| O994_RS01195 | EF3031 |             | -4.4 | PTS system transporter subunit IIB                     | 2.40E-14  |
| O994_RS00870 | EF3108 |             | -2.4 | oligopeptide ABC transporter permease Opp2B            | 6.30E-17  |
| O994_RS00865 | EF3109 |             | -1.7 | oligopeptide ABC transporter ATP-binding protein Opp2F | 1.10E-03  |
| O994_RS00715 | EF3136 |             | -5.7 | PTS system transporter subunit IIA                     | 3.90E-25  |
| O994_RS00710 | EF3137 |             | -6.3 | PTS sugar transporter subunit IIB                      | 3.30E-10  |
| O994_RS00705 | EF3138 |             | -6.5 | PTS system transporter subunit IID                     | 4.40E-08  |
| O994_RS00700 | EF3139 |             | -6.7 | PTS system transporter subunit IIC                     | 3.10E-48  |
| O994_RS00435 | EF3198 |             | -2.2 | YaeC family lipoprotein                                | 1.90E-03  |
| O994_RS00430 | EF3199 |             | -2.1 | ABC transporter permease                               | 2.30E-03  |
| O994_RS00370 | EF3211 |             | -8.8 | PTS system transporter subunit IIB                     | 2.80E-55  |
| O994_RS00365 | EF3212 |             | -8.3 | PTS system transporter subunit IIC                     | 2.40E-59  |
| O994_RS00360 | EF3213 |             | -7.7 | PTS system transporter subunit IID                     | 1.40E-52  |
| O994_RS14260 | EF3306 |             | -4.3 | PTS system sorbitol-specific transporter subunit IIBC  | 2.70E-14  |
| O994_RS14255 | EF3307 | <i>srlA</i> | -5.1 | PTS system sorbitol-specific transporter subunit IIC   | 5.30E-13  |
| O994_RS14155 | EF3327 |             | -9.8 | citrate transporter                                    | 7.80E-108 |

### **Metabolism of cofactors and vitamins**

|              |        |             |     |                                           |          |
|--------------|--------|-------------|-----|-------------------------------------------|----------|
| O994_RS12640 | EF0371 |             | 2.1 | class V aminotransferase                  | 8.30E-07 |
| O994_RS02965 | EF0848 | <i>acpS</i> | 2.5 | holo-ACP synthase                         | 2.70E-13 |
| O994_RS03905 | EF1039 |             | 3.7 | HAD superfamily hydrolase                 | 1.30E-33 |
| O994_RS07395 | EF1725 | <i>fhs</i>  | 1.7 | formate--tetrahydrofolate ligase          | 1.00E-04 |
| O994_RS08435 | EF1969 |             | 1.5 | phosphomethylpyrimidine kinase            | 5.00E-02 |
| O994_RS08960 | EF2072 |             | 1.7 | class V aminotransferase                  | 1.90E-03 |
| O994_RS10130 | EF2451 | <i>coaD</i> | 1.4 | pantetheine-phosphate adenylyltransferase | 9.30E-02 |
| O994_RS10770 | EF2625 | <i>nadE</i> | 2.1 | NAD synthetase                            | 1.50E-08 |
| O994_RS10775 | EF2626 |             | 2.6 | nicotinate phosphoribosyltransferase      | 1.70E-20 |
| O994_RS00145 | EF3269 | <i>folB</i> | 1.8 | dihydroneopterin aldolase                 | 3.30E-02 |



|                                                        |        |               |      |                                                                  |          |
|--------------------------------------------------------|--------|---------------|------|------------------------------------------------------------------|----------|
| O994_RS13340                                           | EF0186 | <i>deoD-1</i> | -1.7 | purine nucleoside phosphorylase                                  | 2.70E-04 |
| O994_RS13025                                           | EF0253 |               | -5.6 | aldehyde dehydrogenase                                           | 5.40E-67 |
| O994_RS06970                                           | EF1637 | <i>eutT</i>   | -1.8 | ATP:cob(I)alamin adenosyltransferase                             | 4.30E-02 |
| O994_RS07920                                           | EF1858 | <i>panD</i>   | -1.4 | aspartate $\alpha$ -decarboxylase                                | 8.60E-02 |
| O994_RS07925                                           | EF1859 | <i>panC</i>   | -1.7 | pantoate- $\beta$ -alanine ligase                                | 5.20E-04 |
| O994_RS07930                                           | EF1860 | <i>panB</i>   | -1.6 | 3-methyl-2-oxobutanoate hydroxymethyltransferase                 | 1.50E-03 |
| O994_RS08535                                           | EF1989 | <i>hemH</i>   | -2.1 | ferrochelatase                                                   | 2.00E-05 |
| O994_RS10510                                           | EF2569 |               | -5.6 | hypothetical protein                                             | 1.00E-04 |
| <b><u>Metabolism of other amino acids</u></b>          |        |               |      |                                                                  |          |
| O994_RS02970                                           | EF0849 | <i>alr</i>    | 2.0  | alanine racemase                                                 | 7.30E-11 |
| O994_RS11340                                           | EF2749 | <i>dltA</i>   | 4.5  | D-alanine-poly(phosphoribitol) ligase subunit 1                  | 6.60E-88 |
| O994_RS10500                                           | EF2567 | <i>selD</i>   | -5.2 | selenide water dikinase                                          | 1.60E-41 |
| O994_RS10565                                           | EF2581 |               | -5.7 | selenate reductase subunit                                       | 2.90E-38 |
| <b><u>Metabolism of terpenoids and polyketides</u></b> |        |               |      |                                                                  |          |
| O994_RS13875                                           | EF0051 | <i>ipk</i>    | 2.1  | 4-diphosphocytidyl-2-C-methyl-D-erythritol kinase                | 1.10E-05 |
| O994_RS03225                                           | EF0902 | <i>mvaK</i>   | 2.0  | phosphomevalonate kinase                                         | 2.30E-04 |
| O994_RS03230                                           | EF0903 | <i>mvaD</i>   | 2.7  | diphosphomevalonate decarboxylase                                | 1.50E-09 |
| O994_RS03235                                           | EF0904 | <i>mvk</i>    | 4.3  | mevalonate kinase                                                | 4.90E-34 |
| O994_RS05600                                           | EF1363 | <i>mvaS</i>   | 4.9  | hydroxymethylglutaryl-CoA synthase                               | 3.90E-71 |
| O994_RS14705                                           | EF1364 | <i>mvaE</i>   | 4.0  | acetyl-CoA acetyltransferase/hydroxymethylglutaryl-CoA reductase | 3.10E-45 |
| O994_RS10325                                           | EF2495 | <i>uppS</i>   | 3.4  | UDP-diphosphate synthase                                         | 2.50E-36 |
| O994_RS00245                                           | EF3245 | <i>uppP</i>   | 5.1  | cell-envelope associated acid phosphatase                        | 2.80E-94 |
| <b><u>Nucleotide metabolism</u></b>                    |        |               |      |                                                                  |          |
| O994_RS13400                                           | EF0171 | <i>adD</i>    | 3.5  | adenosine deaminase                                              | 1.20E-18 |
| O994_RS12975                                           | EF0264 | <i>hpt</i>    | 3.2  | hypoxanthine-guanine phosphoribosyltransferase                   | 2.50E-24 |
| O994_RS12790                                           | EF0285 | <i>pyrD-1</i> | 1.7  | dihydroorotate dehydrogenase 1A                                  | 1.70E-04 |
| O994_RS12155                                           | EF0471 | <i>nrdE</i>   | 1.8  | ribonucleotide-diphosphate reductase subunit $\alpha$            | 3.30E-06 |
| O994_RS12150                                           | EF0472 | <i>nrdI</i>   | 2.1  | ribonucleotide reductase stimulatory protein                     | 5.70E-09 |
| O994_RS05415                                           | EF1319 |               | 1.8  | hypothetical protein                                             | 3.70E-03 |

|              |        |               |      |                                                        |          |
|--------------|--------|---------------|------|--------------------------------------------------------|----------|
| O994_RS06555 | EF1547 | <i>cmk</i>    | 2.3  | cytidylate kinase                                      | 1.70E-13 |
| O994_RS09560 | EF2361 | <i>purB</i>   | 2.3  | adenylosuccinate lyase                                 | 8.80E-13 |
| O994_RS09565 | EF2362 | <i>purK</i>   | 3.0  | 5-(carboxyamino)imidazole ribonucleotide synthase      | 2.20E-22 |
| O994_RS09575 | EF2364 |               | 2.0  | xanthine permease                                      | 2.20E-03 |
| O994_RS10030 | EF2432 |               | 1.9  | metallo- $\beta$ -lactamase superfamily protein        | 7.30E-07 |
| O994_RS10115 | EF2448 |               | 2.3  | comE operon protein 2                                  | 9.40E-05 |
| O994_RS10445 | EF2555 | <i>tdk</i>    | 2.1  | thymidine kinase                                       | 2.10E-06 |
| O994_RS11360 | EF2754 | <i>nrdD</i>   | 1.6  | anaerobic ribonucleoside triphosphate reductase        | 9.40E-04 |
| O994_RS00755 | EF3127 | <i>gmk</i>    | 3.0  | guanylate kinase                                       | 4.60E-22 |
| O994_RS14320 | EF3293 | <i>guaB</i>   | 2.8  | inosine 5'-monophosphate dehydrogenase                 | 9.90E-18 |
| O994_RS13845 | EF0062 |               | -2.5 | 5'-nucleotidase                                        | 2.00E-11 |
| O994_RS13390 | EF0173 | <i>pyn</i>    | -2.1 | pyrimidine-nucleoside phosphorylase                    | 4.50E-10 |
| O994_RS13380 | EF0175 | <i>cdd</i>    | -2.4 | cytidine deaminase                                     | 3.30E-15 |
| O994_RS13335 | EF0187 | <i>deoD-2</i> | -1.8 | purine nucleoside phosphorylase                        | 7.50E-05 |
| O994_RS13150 | EF0228 | <i>adk</i>    | -3.7 | adenylate kinase                                       | 2.60E-37 |
| O994_RS12570 | EF0386 | <i>arcC-2</i> | -3.2 | carbamate kinase                                       | 1.10E-06 |
| O994_RS07345 | EF1715 | <i>pyrK</i>   | -1.7 | dihydroorotate dehydrogenase electron transfer subunit | 4.90E-02 |
| O994_RS07350 | EF1716 | <i>carB</i>   | -1.6 | carbamoyl phosphate synthase large subunit             | 1.70E-02 |
| O994_RS09865 | EF2396 | <i>pyrH</i>   | -2.4 | uridylate kinase                                       | 1.60E-09 |
| O994_RS10595 | EF2587 |               | -1.6 | inosine-uridine preferring nucleoside hydrolase        | 8.20E-03 |
| O994_RS11815 | EF2902 |               | -2.3 | 2',3'-cyclic-nucleotide 2'-phosphodiesterase           | 1.50E-08 |
| O994_RS14205 | EF3317 | <i>citM</i>   | -4.6 | oxaloacetate decarboxylase                             | 6.50E-49 |
| <b>Other</b> |        |               |      |                                                        |          |
| O994_RS12970 | EF0265 | <i>ftsH</i>   | 1.5  | cell division protease                                 | 9.50E-03 |
| O994_RS12965 | EF0266 | <i>hsp33</i>  | 4.5  | molecular chaperone                                    | 3.00E-29 |
| O994_RS02490 | EF0740 |               | 2.3  | deoxynucleoside kinase                                 | 2.30E-04 |
| O994_RS02750 | EF0794 |               | 3.4  | rRNA methyltransferase                                 | 1.80E-23 |
| O994_RS03660 | EF0990 | <i>ftsL</i>   | 2.4  | cell division protein                                  | 1.00E-14 |
| O994_RS03720 | EF1002 | <i>divIVA</i> | 1.6  | cell division protein                                  | 3.80E-04 |
| O994_RS04540 | EF1151 | <i>gpsB</i>   | 1.4  | cell division protein                                  | 7.10E-02 |

|              |        |               |      |                                                                |          |
|--------------|--------|---------------|------|----------------------------------------------------------------|----------|
| O994_RS05480 | EF1338 | <i>trxB</i>   | 1.4  | thioredoxin reductase                                          | 8.50E-02 |
| O994_RS05645 | EF1371 |               | 2.4  | metallo- $\beta$ -lactamase                                    | 3.00E-10 |
| O994_RS06745 | EF1586 | <i>nox</i>    | 2.5  | NADH oxidase                                                   | 5.50E-21 |
| O994_RS07105 | EF1665 | <i>traX</i>   | 9.1  | conjugal transfer protein                                      | 7.90E-11 |
| O994_RS07175 | EF1679 |               | 1.6  | carboxyl-terminal processing protease                          | 4.10E-03 |
| O994_RS07205 | EF1685 | <i>hlyIII</i> | 3.2  | hemolysin III                                                  | 2.30E-32 |
| O994_RS08205 | EF1917 | <i>clpX</i>   | 2.1  | Clp protease ATP-binding subunit                               | 5.30E-11 |
| O994_RS09290 | EF2201 |               | 2.0  | flavodoxin                                                     | 1.60E-04 |
| O994_RS09535 | EF2352 | <i>lepA</i>   | 1.4  | GTP-binding protein                                            | 7.10E-02 |
| O994_RS09550 | EF2355 | <i>clpB</i>   | 2.2  | Clp protease ATP-binding subunit                               | 2.50E-12 |
| O994_RS10610 | EF2590 |               | 2.4  | serine hydrolase: $\beta$ -lactamase transpeptidase family     | 1.30E-09 |
| O994_RS10940 | EF2664 |               | 2.7  | phosphoglycerate mutase                                        | 1.50E-08 |
| O994_RS11270 | EF2734 |               | 2.4  | Gfo/Idh/MocA family oxidoreductase                             | 5.40E-17 |
| O994_RS00080 | EF3282 | <i>clpC</i>   | 2.9  | Clp protease ATP-binding subunit                               | 4.40E-34 |
| O994_RS13900 | EF0046 |               | -1.7 | ribonuclease III family protein                                | 3.50E-04 |
| O994_RS13680 | EF0097 | <i>pfoR</i>   | -4.9 | regulatory protein                                             | 2.80E-72 |
| O994_RS13425 | EF0166 |               | -2.2 | phage integrase family site specific recombinase               | 9.40E-05 |
| O994_RS13280 | EF0200 | <i>fusA</i>   | -2.6 | elongation factor G                                            | 2.70E-10 |
| O994_RS13275 | EF0201 | <i>tuf</i>    | -1.5 | elongation factor Tu                                           | 1.30E-02 |
| O994_RS12830 | EF0277 | <i>ogt</i>    | -2.2 | methylated-DNA--[protein]-cysteine <i>S</i> -methyltransferase | 5.20E-06 |
| O994_RS02150 | EF0678 |               | -4.2 | GNAT family <i>N</i> -acetyltransferase                        | 3.70E-25 |
| O994_RS01630 | EF0706 | <i>clpE</i>   | -1.9 | Clp protease ATP-binding subunit                               | 7.90E-06 |
| O994_RS02855 | EF0827 |               | -2.3 | Gfo/Idh/MocA family oxidoreductase                             | 3.40E-06 |
| O994_RS04100 | EF1058 |               | -2.2 | universal stress protein                                       | 7.80E-05 |
| O994_RS04575 | EF1158 |               | -4.0 | N4-( $\beta$ - <i>N</i> -acetylglucosaminy)-L-asparaginase     | 6.00E-15 |
| O994_RS01615 | EF1874 |               | -3.0 | IS256 family transposase                                       | 1.30E-15 |
| O994_RS08500 | EF1982 | <i>uspA</i>   | -2.2 | universal stress protein                                       | 4.40E-05 |
| O994_RS09325 | EF2208 | <i>phzF</i>   | -2.3 | PhzF family phenazine biosynthesis protein                     | 2.50E-05 |
| O994_RS10290 | EF2488 | <i>cpsH</i>   | -4.5 | lipoprotein                                                    | 8.30E-39 |
| O994_RS10300 | EF2490 | <i>cpsF</i>   | -3.4 | casular polysaccharide biosynthesis protein                    | 2.30E-17 |

|              |        |             |      |                                             |          |
|--------------|--------|-------------|------|---------------------------------------------|----------|
| O994_RS10305 | EF2491 |             | -2.7 | glycosyl transferase group 2 family protein | 5.40E-11 |
| O994_RS10310 | EF2492 |             | -1.7 | glycosyl transferase group 2 family protein | 5.30E-02 |
| O994_RS10475 | EF2562 |             | -6.6 | flavodoxin                                  | 4.20E-18 |
| O994_RS01520 | EF2972 |             | -1.7 | amidinotransferase                          | 9.00E-03 |
| O994_RS01190 | EF3032 | <i>btpA</i> | -4.6 | photosystem I biogenesis protein            | 1.30E-23 |
| O994_RS01175 | EF3035 |             | -1.9 | universal stress protein                    | 7.60E-05 |

### **Poorly characterised**

|              |        |  |     |                                              |           |
|--------------|--------|--|-----|----------------------------------------------|-----------|
| O994_RS14005 | EF0026 |  | 5.5 | hypothetical protein                         | 1.30E-94  |
| O994_RS13065 | EF0245 |  | 2.0 | decarboxylase                                | 1.30E-03  |
| O994_RS12415 | EF0419 |  | 2.3 | hypothetical protein                         | 1.40E-12  |
| O994_RS12205 | EF0462 |  | 1.9 | hypothetical protein                         | 1.20E-02  |
| O994_RS12170 | EF0468 |  | 4.6 | LemA family protein                          | 6.60E-51  |
| O994_RS12165 | EF0469 |  | 4.6 | TPM domain-containing protein                | 8.20E-56  |
| O994_RS02125 | EF0673 |  | 2.2 | acyltransferase family protein               | 2.60E-03  |
| O994_RS02180 | EF0684 |  | 1.4 | HD domain-containing protein                 | 3.90E-02  |
| O994_RS02260 | EF0699 |  | 1.8 | AI-2E family transporter                     | 3.30E-03  |
| O994_RS02340 | EF0708 |  | 2.2 | hypothetical protein                         | 7.90E-10  |
| O994_RS02525 | EF0747 |  | 3.0 | DUF1003 domain-containing protein            | 8.20E-25  |
| O994_RS02695 | EF0783 |  | 4.3 | acetyltransferase                            | 2.30E-67  |
| O994_RS02755 | EF0795 |  | 3.5 | TIGR01212 family radical SAM protein         | 4.10E-30  |
| O994_RS02765 | EF0797 |  | 5.4 | DUF4097 family $\beta$ strand repeat protein | 3.60E-158 |
| O994_RS02770 | EF0798 |  | 5.5 | DUF1700 domain-containing protein            | 3.20E-154 |
| O994_RS02785 | EF0802 |  | 8.1 | DUF3955 domain-containing protein            | 5.00E-84  |
| O994_RS02820 | EF0819 |  | 3.0 | DUF960 domain-containing protein             | 1.80E-17  |
| O994_RS03245 | EF0906 |  | 2.0 | FUSC family protein                          | 1.20E-02  |
| O994_RS03370 | EF0931 |  | 3.6 | hypothetical protein                         | 7.50E-12  |
| O994_RS03375 | EF0932 |  | 7.4 | hypothetical protein                         | 7.00E-23  |
| O994_RS03740 | EF1006 |  | 1.5 | DUF4828 domain-containing protein            | 2.50E-03  |
| O994_RS04140 | EF1067 |  | 4.8 | hypothetical protein                         | 8.80E-63  |
| O994_RS04305 | EF1102 |  | 5.8 | YxA family protein                           | 5.70E-11  |
| O994_RS04320 | EF1105 |  | 2.1 | hypothetical protein                         | 1.90E-03  |

|              |        |     |                                                                |           |
|--------------|--------|-----|----------------------------------------------------------------|-----------|
| O994_RS04450 | EF1132 | 5.0 | CBS-domain containing hypothetical protein                     | 7.60E-87  |
| O994_RS04855 | EF1215 | 1.9 | hypothetical protein                                           | 1.90E-02  |
| O994_RS04935 | EF1231 | 7.8 | metallophosphoesterase                                         | 3.10E-78  |
| O994_RS05020 | EF1249 | 2.3 | fibronectin/fibrinogen-binding protein                         | 6.50E-09  |
| O994_RS05025 | EF1250 | 1.8 | hypothetical protein                                           | 2.20E-03  |
| O994_RS05040 | EF1254 | 1.9 | putative tryptophan/tyrosine transport system permease protein | 1.60E-03  |
| O994_RS05060 | EF1258 | 5.5 | hypothetical protein                                           | 5.30E-39  |
| O994_RS05080 | EF1262 | 1.5 | hypothetical protein                                           | 6.30E-02  |
| O994_RS05085 | EF1263 | 1.7 | ftsX-like permease                                             | 7.60E-03  |
| O994_RS05150 | EF1276 | 1.5 | hypothetical protein                                           | 6.80E-02  |
| O994_RS05395 | EF1315 | 2.1 | hypothetical protein                                           | 2.70E-04  |
| O994_RS05490 | EF1340 | 3.8 | pheromone cAM373 lipoprotein                                   | 2.90E-14  |
| O994_RS05620 | EF1366 | 1.5 | hypothetical protein                                           | 9.00E-02  |
| O994_RS05650 | EF1372 | 1.5 | CBS domain-containing protein                                  | 2.50E-02  |
| O994_RS05800 | EF1402 | 2.4 | cell division protein                                          | 1.60E-12  |
| O994_RS05805 | EF1403 | 2.3 | hypothetical protein                                           | 1.10E-07  |
| O994_RS05850 | EF1412 | 5.3 | hypothetical protein                                           | 4.40E-60  |
| O994_RS05860 | EF1414 | 2.2 | hypothetical protein                                           | 5.20E-05  |
| O994_RS05890 | EF1420 | 1.6 | DUF4950 domain-containing protein                              | 2.00E-02  |
| O994_RS05895 | EF1421 | 2.1 | ImmA/IrrE family metallo-endopeptidase                         | 2.30E-04  |
| O994_RS06260 | EF1490 | 1.7 | hypothetical protein                                           | 1.90E-02  |
| O994_RS06315 | EF1501 | 2.2 | hypothetical protein                                           | 1.20E-07  |
| O994_RS06440 | EF1523 | 1.6 | hypothetical protein                                           | 1.60E-03  |
| O994_RS06480 | EF1532 | 9.0 | hypothetical protein                                           | 9.90E-78  |
| O994_RS06485 | EF1533 | 9.0 | hypothetical protein                                           | 9.20E-135 |
| O994_RS06500 | EF1536 | 2.7 | $\alpha/\beta$ hydrolase                                       | 7.40E-14  |
| O994_RS06530 | EF1542 | 3.2 | hypothetical protein                                           | 1.10E-14  |
| O994_RS06540 | EF1544 | 2.0 | helix-turn-helix domain-containing protein                     | 1.50E-03  |
| O994_RS06575 | EF1552 | 1.8 | hypothetical protein                                           | 6.40E-05  |
| O994_RS06580 | EF1553 | 1.9 | tetratricopeptide repeat protein                               | 3.30E-06  |
| O994_RS06585 | EF1554 | 1.7 | YpiB family protein                                            | 4.90E-03  |

|              |        |             |     |                                           |           |
|--------------|--------|-------------|-----|-------------------------------------------|-----------|
| O994_RS06680 | EF1573 |             | 1.5 | DUF479 domain-containing protein          | 7.30E-02  |
| O994_RS11790 | EF1665 |             | 5.7 | DUF3955 domain-containing protein         | 7.30E-23  |
| O994_RS07180 | EF1680 |             | 1.8 | YozE family protein                       | 1.10E-04  |
| O994_RS07275 | EF1701 |             | 1.6 | DNA-binding protein                       | 5.00E-03  |
| O994_RS07380 | EF1722 | <i>rluD</i> | 1.5 | RluA family pseudouridine synthase        | 2.90E-02  |
| O994_RS07390 | EF1724 |             | 1.6 | CBS domain-containing protein             | 6.20E-03  |
| O994_RS07530 | EF1751 |             | 4.5 | putative membrane protein                 | 2.70E-83  |
| O994_RS07535 | EF1752 |             | 4.6 | hypothetical protein                      | 8.20E-97  |
| O994_RS07540 | EF1753 | <i>liaX</i> | 5.5 | hypothetical protein                      | 6.80E-182 |
| O994_RS07620 | EF1771 |             | 1.8 | yigZ family protein                       | 7.30E-04  |
| O994_RS08145 | EF1903 |             | 3.0 | hypothetical protein                      | 7.50E-25  |
| O994_RS08155 | EF1906 |             | 2.5 | hypothetical protein                      | 1.30E-17  |
| O994_RS08170 | EF1909 |             | 1.8 | hypothetical protein                      | 7.30E-05  |
| O994_RS08200 | EF1916 | <i>engB</i> | 3.0 | GTP-binding protein                       | 3.80E-11  |
| O994_RS08275 | EF1933 |             | 3.3 | hypothetical protein                      | 9.50E-11  |
| O994_RS08325 | EF1946 |             | 2.8 | hypothetical protein                      | 1.30E-11  |
| O994_RS08330 | EF1947 |             | 2.8 | hypothetical protein                      | 8.90E-13  |
| O994_RS08420 | EF1966 |             | 1.9 | YitT family protein                       | 1.90E-03  |
| O994_RS08925 | EF2065 |             | 3.9 | DUF1033 family protein                    | 4.30E-12  |
| O994_RS09035 | EF2148 |             | 1.6 | hypothetical protein                      | 4.00E-02  |
| O994_RS09045 | EF2149 |             | 1.4 | hypothetical protein                      | 6.00E-02  |
| O994_RS09075 | EF2155 |             | 1.5 | phosphoglucosamine mutase                 | 5.60E-03  |
| O994_RS09080 | EF2156 |             | 2.0 | hypothetical protein                      | 5.40E-08  |
| O994_RS09145 | EF2169 |             | 1.5 | putative glycosylation ligase             | 3.00E-02  |
| O994_RS09340 | EF2211 |             | 5.3 | YxeA family protein                       | 2.00E-63  |
| O994_RS09360 | EF2215 |             | 6.1 | hypothetical protein                      | 1.40E-79  |
| O994_RS09365 | EF2216 |             | 5.0 | FUSC family protein                       | 1.40E-24  |
| O994_RS09620 | EF2373 |             | 2.3 | hypothetical protein                      | 8.50E-10  |
| O994_RS10035 | EF2433 |             | 1.5 | phosphoglycerate mutase                   | 1.90E-02  |
| O994_RS10125 | EF2450 |             | 1.5 | PDZ domain-containing protein             | 2.30E-02  |
| O994_RS10205 | EF2470 |             | 3.9 | putative metal-dependent phosphohydrolase | 8.60E-51  |

|              |        |     |                                                     |          |
|--------------|--------|-----|-----------------------------------------------------|----------|
| O994_RS10240 | EF2477 | 2.0 | SPFH domain-containing protein                      | 2.50E-08 |
| O994_RS10245 | EF2478 | 2.1 | hypothetical protein                                | 7.10E-11 |
| O994_RS10250 | EF2479 | 2.2 | TPM domain-containing protein                       | 4.20E-13 |
| O994_RS10345 | EF2499 | 3.8 | hypothetical protein                                | 3.50E-34 |
| O994_RS14875 | EF2499 | 3.4 | hypothetical protein                                | 2.60E-21 |
| O994_RS10360 | EF2502 | 3.8 | cell cycle protein FtsW                             | 7.00E-40 |
| O994_RS10680 | EF2606 | 3.5 | DUF1146 domain-containing protein                   | 4.90E-15 |
| O994_RS11075 | EF2692 | 3.3 | hypothetical protein                                | 3.60E-13 |
| O994_RS11100 | EF2697 | 4.2 | putative 5-bromo-4-chloroindoyl phosphate hydrolase | 2.70E-87 |
| O994_RS11300 | EF2740 | 2.8 | <i>O</i> -methyltransferase                         | 2.00E-14 |
| O994_RS11445 | EF2771 | 6.8 | traX family protein                                 | 1.50E-69 |
| O994_RS11505 | EF2784 | 2.6 | DUF3042 domain containing protein                   | 5.40E-11 |
| O994_RS11560 | EF2796 | 1.8 | hypothetical protein                                | 3.80E-04 |
| O994_RS11605 | EF2862 | 4.9 | hypothetical protein                                | 1.80E-48 |
| O994_RS11650 | EF2872 | 1.5 | RNA-binding protein                                 | 8.60E-02 |
| O994_RS11660 | EF2874 | 2.6 | haloacid dehalogenase (HAD) superfamily             | 1.30E-10 |
| O994_RS11775 | EF2893 | 2.0 | hypothetical protein                                | 7.60E-04 |
| O994_RS11945 | EF2929 | 4.4 | hypothetical protein                                | 5.00E-38 |
| O994_RS11950 | EF2930 | 3.4 | hypothetical protein                                | 6.30E-13 |
| O994_RS01475 | EF2982 | 1.7 | phosphoglycerate mutase                             | 1.20E-04 |
| O994_RS01260 | EF3018 | 3.9 | hypothetical protein                                | 2.00E-60 |
| O994_RS01100 | EF3051 | 1.9 | peptidase C39 family protein                        | 2.60E-03 |
| O994_RS01095 | EF3052 | 1.8 | hypothetical protein                                | 1.20E-04 |
| O994_RS01070 | EF3057 | 3.9 | hypothetical protein                                | 4.00E-27 |
| O994_RS00975 | EF3078 | 2.4 | DUF1054 domain-containing protein                   | 5.10E-05 |
| O994_RS00970 | EF3079 | 2.6 | GNAT family N-acetyltransferase                     | 5.40E-09 |
| O994_RS00655 | EF3149 | 2.4 | helix-turn-helix domain-containing protein          | 6.10E-17 |
| O994_RS00650 | EF3150 | 2.9 | M16 family peptidase                                | 6.30E-30 |
| O994_RS00645 | EF3151 | 3.1 | insulinase family protein                           | 6.60E-30 |
| O994_RS00535 | EF3176 | 5.4 | YccF domain-containing protein                      | 2.20E-26 |
| O994_RS00530 | EF3177 | 2.7 | hypothetical protein                                | 2.50E-08 |

*xpaC*

|              |        |      |                                           |          |
|--------------|--------|------|-------------------------------------------|----------|
| O994_RS00520 | EF3179 | 3.0  | DUF3298 domain-containing protein         | 5.30E-07 |
| O994_RS00475 | EF3188 | 1.6  | hypothetical protein                      | 6.40E-03 |
| O994_RS00465 | EF3191 | 2.3  | $\alpha/\beta$ hydrolase                  | 5.50E-06 |
| O994_RS00460 | EF3192 | 2.3  | isochorismatase                           | 2.20E-06 |
| O994_RS00305 | EF3234 | 1.7  | DUF5105 domain-containing protein         | 2.70E-04 |
| O994_RS00265 | EF3239 | 4.6  | zinc ribbon domain-containing protein     | 2.10E-44 |
| O994_RS00120 | EF3273 | 2.2  | hypothetical protein                      | 1.00E-04 |
| O994_RS14110 | EF0003 | -2.8 | RNA binding protein                       | 1.60E-18 |
| O994_RS14055 | EF0016 | -1.4 | DegV family protein                       | 6.00E-02 |
| O994_RS14015 | EF0024 | -1.7 | DUF956 family protein                     | 6.70E-03 |
| O994_RS13890 | EF0048 | -2.1 | NYN domain-containing protein             | 3.70E-06 |
| O994_RS13790 | EF0071 | -3.6 | putative lipoprotein                      | 2.80E-16 |
| O994_RS01610 | EF0101 | -3.2 | $\alpha/\beta$ fold family hydrolase      | 3.00E-26 |
| O994_RS13600 | EF0115 | -5.2 | endoribonuclease L-PSP                    | 9.70E-39 |
| O994_RS13430 | EF0165 | -2.3 | hypothetical protein                      | 3.00E-04 |
| O994_RS12870 | EF0269 | -5.4 | PRD domain-containing protein             | 6.80E-57 |
| O994_RS12850 | EF0273 | -2.0 | phosphoglycerate mutase                   | 2.00E-02 |
| O994_RS12820 | EF0279 | -2.1 | HD domain-containing protein              | 3.20E-04 |
| O994_RS12580 | EF0383 | -6.7 | DUF2877 domain-containing protein         | 1.40E-41 |
| O994_RS14960 | EF0383 | -7.0 | hypothetical protein                      | 9.50E-85 |
| O994_RS12545 | EF0392 | -2.3 | WxL domain-containing protein             | 3.10E-05 |
| O994_RS12475 | EF0405 | -3.8 | HAD superfamily hydrolase                 | 2.80E-27 |
| O994_RS02005 | EF0651 | -2.4 | M48 family metallopeptidase               | 6.80E-06 |
| O994_RS02865 | EF0829 | -3.9 | PRD domain-containing protein             | 5.50E-10 |
| O994_RS02870 | EF0830 | -3.6 | glycine-rich SFCGS family protein         | 1.30E-09 |
| O994_RS02880 | EF0832 | -3.2 | DUF4311 domain-containing protein         | 8.10E-08 |
| O994_RS03105 | EF0877 | -3.7 | aldo/keto reductase family oxidoreductase | 6.60E-30 |
| O994_RS03340 | EF0925 | -2.0 | hypothetical protein                      | 6.00E-04 |
| O994_RS03430 | EF0943 | -1.6 | hypothetical protein                      | 8.70E-02 |
| O994_RS03775 | EF1014 | -5.7 | hypothetical protein                      | 5.30E-21 |



|              |        |             |      |                                                    |          |
|--------------|--------|-------------|------|----------------------------------------------------|----------|
| O994_RS03780 | EF1015 |             | -5.5 | DUF3188 domain-containing protein                  | 2.90E-17 |
| O994_RS03880 | EF1034 | <i>uvrA</i> | -2.1 | aminoglycoside phosphotransferase family protein   | 6.70E-05 |
| O994_RS03885 | EF1035 |             | -3.3 | DUF4767 domain-containing protein                  | 3.00E-11 |
| O994_RS04175 | EF1074 |             | -2.5 | hypothetical protein                               | 8.80E-07 |
| O994_RS04180 | EF1075 |             | -3.5 | <i>N</i> -acetyltransferase                        | 1.00E-13 |
| O994_RS04235 | EF1089 |             | -1.6 | DUF805 domain-containing protein                   | 1.30E-02 |
| O994_RS04470 | EF1137 |             | -1.7 | hypothetical protein                               | 3.70E-02 |
| O994_RS05210 | EF1288 |             | -1.7 | hypothetical protein                               | 2.80E-02 |
| O994_RS05540 | EF1350 |             | -3.2 | TMEM175 potassium channel family protein           | 4.10E-11 |
| O994_RS05595 | EF1362 |             | -1.9 | hypothetical protein                               | 2.60E-04 |
| O994_RS07065 | EF1657 |             | -4.5 | hypothetical protein                               | 3.20E-35 |
| O994_RS07245 | EF1693 |             | -2.6 | KH domain-containing protein                       | 2.20E-08 |
| O994_RS07310 | EF1708 |             | -1.8 | putative glycosyl hydrolase                        | 5.20E-02 |
| O994_RS15000 | EF1945 |             | -4.7 | alkaline phosphatase family protein                | 8.80E-15 |
| O994_RS09310 | EF2205 |             | -5.0 | putative 4.5S RNA: signal recognition particle     | 4.10E-17 |
| O994_RS09330 | EF2209 |             | -1.6 | hypothetical protein                               | 6.00E-02 |
| O994_RS09385 | EF2220 |             | -3.4 | hypothetical protein                               | 7.00E-09 |
| O994_RS09480 | EF2239 |             | -3.4 | hypothetical protein                               | 3.00E-12 |
| O994_RS10075 | EF2441 |             | -4.8 | DUF47 family protein                               | 1.20E-32 |
| O994_RS10490 | EF2465 |             | -4.8 | DUF3343 domain-containing protein                  | 1.70E-13 |
| O994_RS10485 | EF2564 |             | -4.8 | hydroxylase accessory protein                      | 3.90E-20 |
| O994_RS10495 | EF2566 |             | -5.0 | hypothetical protein                               | 3.60E-23 |
| O994_RS10515 | EF2570 |             | -5.4 | aldehyde oxidoreductase                            | 1.40E-11 |
| O994_RS10570 | EF2582 |             | -6.8 | chlorohydrolase/aminohydrolase                     | 1.30E-26 |
| O994_RS01685 | EF2681 |             | -2.3 | HAD family hydrolase                               | 1.10E-04 |
| O994_RS14905 | EF2687 |             | -1.7 | hypothetical protein                               | 1.70E-02 |
| O994_RS14900 | EF2687 |             | -1.7 | hypothetical protein                               | 2.60E-02 |
| O994_RS11055 | EF2688 |             | -1.4 | SNF2 helicase associated domain-containing protein | 4.50E-02 |
| O994_RS11550 | EF2793 |             | -2.2 | DUF805 domain-containing protein                   | 3.40E-07 |
| O994_RS11565 | EF2797 |             | -2.0 | hypothetical protein                               | 4.80E-04 |
| O994_RS11615 | EF2864 |             | -2.1 | hypothetical protein                               | 4.70E-09 |

|              |        |  |      |                                 |          |
|--------------|--------|--|------|---------------------------------|----------|
| O994_RS11825 | EF2904 |  | -1.9 | MBL fold metallo-hydrolase      | 4.40E-06 |
| O994_RS01170 | EF3036 |  | -1.9 | thioredoxin family protein      | 3.40E-06 |
| O994_RS00905 | EF3093 |  | -1.8 | cupin domain-containing protein | 6.00E-04 |
| O994_RS00085 | EF3281 |  | -1.8 | FUSC family protein             | 1.30E-02 |
| O994_RS14160 | EF3326 |  | -6.5 | hypothetical protein            | 2.40E-65 |
| O994_RS14140 | EF3330 |  | -1.5 | spoIIJ-associated protein       | 2.20E-02 |

### **Replication and repair**

|              |        |              |     |                                   |          |
|--------------|--------|--------------|-----|-----------------------------------|----------|
| O994_RS13810 | EF0066 | <i>ruvA</i>  | 2.5 | Holliday junction DNA helicase    | 7.00E-07 |
| O994_RS13805 | EF0067 | <i>ruvB</i>  | 2.3 | Holliday junction DNA helicase    | 2.50E-08 |
| O994_RS12990 | EF0261 | <i>divIC</i> | 2.7 | cell division protein             | 1.20E-24 |
| O994_RS03575 | EF0972 |              | 4.1 | DNA repair exonuclease            | 2.10E-53 |
| O994_RS05275 | EF1301 | <i>rodA</i>  | 4.1 | rod shape determining protein     | 1.50E-14 |
| O994_RS05810 | EF1404 | <i>mutS2</i> | 2.0 | MutS2 family protein              | 1.20E-04 |
| O994_RS04535 | EF1435 | <i>recU</i>  | 3.2 | recombination protein U           | 1.80E-29 |
| O994_RS06460 | EF1527 | <i>obgE</i>  | 2.8 | GTPase                            | 3.50E-14 |
| O994_RS06750 | EF1587 | <i>mutT</i>  | 4.3 | DNA mismatch repair protein       | 4.90E-37 |
| O994_RS06875 | EF1615 | <i>parE</i>  | 1.7 | DNA topoisomerase IV subunit B    | 1.70E-03 |
| O994_RS07020 | EF1648 | <i>xerC</i>  | 4.3 | integrase/recombinase             | 1.40E-71 |
| O994_RS10935 | EF2663 |              | 2.2 | recombinase D                     | 6.70E-07 |
| O994_RS11420 | EF2766 | <i>recR</i>  | 3.2 | recombination protein             | 4.00E-09 |
| O994_RS01105 | EF3050 | <i>tag-2</i> | 2.8 | DNA-3-methyladenine glycosylase I | 6.70E-07 |

|              |        |              |      |                                   |          |
|--------------|--------|--------------|------|-----------------------------------|----------|
| O994_RS14105 | EF0004 | <i>recF</i>  | -2.9 | recombination protein F           | 2.80E-24 |
| O994_RS14100 | EF0005 | <i>gyrB</i>  | -2.6 | DNA gyrase B subunit              | 5.00E-12 |
| O994_RS14095 | EF0006 | <i>gyrA</i>  | -2.7 | DNA gyrase A subunit              | 1.70E-16 |
| O994_RS12825 | EF0278 | <i>tag-1</i> | -2.1 | DNA-3-methyladenine glycosylase I | 1.30E-05 |
| O994_RS08005 | EF1874 |              | -2.7 | IS256 family transposase          | 1.50E-19 |

### **Signal transduction**

|              |        |             |     |                                                            |          |
|--------------|--------|-------------|-----|------------------------------------------------------------|----------|
| O994_RS13980 | EF0031 | <i>mprF</i> | 1.4 | bifunctional lysylphosphatidylglycerol flippase/synthetase | 9.50E-02 |
| O994_RS05070 | EF1260 | <i>yclR</i> | 3.6 | DNA-binding response regulator                             | 3.40E-44 |
| O994_RS05075 | EF1261 | <i>yclK</i> | 3.4 | sensor histidine kinase                                    | 1.10E-36 |

|              |        |             |      |                                                                   |           |
|--------------|--------|-------------|------|-------------------------------------------------------------------|-----------|
| O994_RS13475 | EF1703 | <i>phoP</i> | 1.6  | alkaline phosphatase synthesis transcriptional regulatory protein | 1.10E-02  |
| O994_RS07295 | EF1705 |             | 3.0  | phosphate-binding protein                                         | 2.70E-23  |
| O994_RS07570 | EF1759 |             | 1.4  | phosphate ABC transporter substrate-binding protein               | 9.90E-02  |
| O994_RS08850 | EF2049 |             | 5.0  | ABC transporter permease                                          | 1.00E-68  |
| O994_RS08855 | EF2050 |             | 6.3  | ABC transporter ATP-binding protein                               | 1.30E-104 |
| O994_RS11325 | EF2746 | <i>dltD</i> | 2.3  | dltD protein                                                      | 5.30E-16  |
| O994_RS11330 | EF2747 | <i>dltC</i> | 2.7  | D-alanine-poly(phosphoribitol) ligase subunit 2                   | 2.70E-21  |
| O994_RS11335 | EF2748 | <i>dltB</i> | 3.3  | basic membrane protein                                            | 1.10E-41  |
| O994_RS11860 | EF2911 | <i>liaR</i> | 3.6  | LuxR family DNA-binding response regulator                        | 4.90E-29  |
| O994_RS11865 | EF2912 | <i>liaS</i> | 4.0  | sensor histidine kinase                                           | 1.20E-48  |
| O994_RS11870 | EF2913 | <i>liaF</i> | 3.9  | cell wall stress response regulator                               | 4.10E-41  |
| O994_RS01515 | EF2973 | <i>phoZ</i> | 1.7  | alkaline phosphatase                                              | 9.60E-02  |
| O994_RS01065 | EF3058 |             | 2.6  | phosphotyrosine protein phosphatase                               | 1.10E-20  |
| O994_RS14335 | EF3289 | <i>croR</i> | 2.8  | DNA-binding response regulator                                    | 9.90E-25  |
| O994_RS14330 | EF3290 | <i>croS</i> | 2.7  | sensor histidine kinase                                           | 1.40E-22  |
| O994_RS04810 | EF1206 |             | -5.7 | malate dehydrogenase                                              | 2.30E-35  |
| O994_RS04815 | EF1207 | <i>maeP</i> | -8.1 | CCS family citrate carrier protein                                | 4.20E-18  |
| O994_RS04820 | EF1209 |             | -2.7 | two-component system, CitB family, sensor kinase                  | 1.30E-12  |
| O994_RS04825 | EF1210 |             | -2.8 | two-component system, CitB family, response regulator             | 1.20E-08  |
| O994_RS06955 | EF1633 |             | -1.9 | two-component system, response regulator                          | 2.80E-02  |
| O994_RS08900 | EF2060 | <i>cydB</i> | -2.3 | cytochrome D ubiquinol oxidase subunit II                         | 7.90E-13  |
| O994_RS08905 | EF2061 | <i>cydA</i> | -2.8 | cytochrome D ubiquinol oxidase subunit I                          | 1.00E-29  |
| O994_RS09380 | EF2219 | <i>yesM</i> | -2.0 | sensor histidine kinase                                           | 8.40E-04  |
| O994_RS00455 | EF3193 | <i>lrgB</i> | -5.4 | antiholin-like protein                                            | 3.00E-71  |
| O994_RS00450 | EF3194 | <i>lrgA</i> | -5.3 | murein hydrolase regulator                                        | 2.50E-79  |
| O994_RS14215 | EF3315 | <i>citG</i> | -1.5 | triphosphoribosyl-dephospho-CoA synthase                          | 3.70E-02  |
| O994_RS14210 | EF3316 | <i>maeE</i> | -2.8 | malic enzyme family protein                                       | 7.90E-17  |
| O994_RS14200 | EF3318 | <i>citX</i> | -4.9 | 2-(5"-triphosphoribosyl)-3'-dephosphocoenzyme-A synthase          | 1.40E-51  |
| O994_RS14195 | EF3319 | <i>citF</i> | -5.2 | citrate lyase subunit $\alpha$                                    | 9.90E-78  |
| O994_RS14190 | EF3320 | <i>citE</i> | -5.8 | citrate lyase subunit $\beta$                                     | 1.80E-85  |

|                                          |        |             |      |                                                                      |          |
|------------------------------------------|--------|-------------|------|----------------------------------------------------------------------|----------|
| O994_RS14185                             | EF3321 | <i>citD</i> | -5.9 | citrate lyase subunit $\gamma$                                       | 3.50E-72 |
| O994_RS14180                             | EF3322 | <i>citC</i> | -5.9 | [citrate(pro-3SO-lyase)] ligase                                      | 4.00E-99 |
| <b><u>Transcription</u></b>              |        |             |      |                                                                      |          |
| O994_RS11875                             | EF2914 | <i>greA</i> | 4.1  | transcription elongation factor                                      | 2.70E-44 |
| O994_RS00760                             | EF3126 | <i>rpoZ</i> | 2.3  | DNA-directed RNA polymerase subunit $\omega$                         | 8.80E-05 |
| O994_RS13125                             | EF0233 | <i>rpoA</i> | -2.3 | DNA-directed RNA polymerase subunit $\alpha$                         | 1.20E-09 |
| O994_RS00290                             | EF3237 | <i>rpoC</i> | -1.8 | DNA-directed RNA polymerase subunit $\beta$                          | 3.30E-05 |
| <b><u>Transcriptional regulators</u></b> |        |             |      |                                                                      |          |
| O994_RS13650                             | EF0103 |             | 1.5  | ArgR family transcriptional regulator                                | 5.80E-02 |
| O994_RS13615                             | EF0110 |             | 2.3  | ArsR family transcriptional regulator                                | 1.10E-04 |
| O994_RS12395                             | EF0422 |             | 2.4  | IclR family transcriptional regulator                                | 5.60E-05 |
| O994_RS12190                             | EF0465 |             | 2.8  | polyisoprenyl-teichoic acid--peptidoglycan teichoic acid transferase | 4.60E-21 |
| O994_RS01990                             | EF0647 |             | 1.8  | helix-turn-helix transcriptional regulator                           | 6.80E-02 |
| O994_RS02225                             | EF0692 |             | 1.8  | RpiR family phosphosugar-binding transcriptional regulator           | 8.80E-02 |
| O994_RS02975                             | EF0850 |             | 2.3  | PemK family transcriptional regulator                                | 7.70E-08 |
| O994_RS03650                             | EF0988 | <i>mraZ</i> | 2.5  | division/cell wall cluster transcriptional repressor                 | 1.60E-20 |
| O994_RS03735                             | EF1005 |             | 2.5  | iron-dependent transcriptional repressor                             | 8.10E-10 |
| O994_RS04360                             | EF1114 |             | 2.1  | helix-turn-helix transcriptional regulator                           | 7.60E-10 |
| O994_RS04835                             | EF1212 |             | 3.3  | transcriptional regulator                                            | 5.10E-35 |
| O994_RS05155                             | EF1277 |             | 2.0  | Cro/CI family transcriptional regulator                              | 4.30E-06 |
| O994_RS05280                             | EF1302 |             | 4.0  | transcriptional regulator                                            | 1.60E-25 |
| O994_RS05285                             | EF1303 |             | 5.0  | LysR family transcriptional regulator                                | 1.50E-36 |
| O994_RS05500                             | EF1342 |             | 2.8  | MarR family transcriptional regulator                                | 3.20E-06 |
| O994_RS05900                             | EF1422 |             | 2.3  | Cro/CI family transcriptional regulator                              | 8.20E-05 |
| O994_RS06450                             | EF1525 |             | 2.4  | Fur family transcriptional regulator, ferric uptake regulator        | 1.40E-11 |
| O994_RS06660                             | EF1569 | <i>psr</i>  | 3.7  | transcriptional regulator                                            | 8.30E-30 |
| O994_RS06800                             | EF1599 |             | 4.2  | Cro/CI family transcriptional regulator                              | 6.80E-16 |
| O994_RS07005                             | EF1645 | <i>codY</i> | 3.1  | transcriptional repressor                                            | 2.40E-28 |
| O994_RS07320                             | EF1710 |             | 1.7  | LysR family transcriptional regulator                                | 1.10E-02 |
| O994_RS07485                             | EF1741 | <i>ccpA</i> | 2.4  | catabolite control protein A                                         | 5.50E-12 |

|              |        |             |      |                                                             |          |
|--------------|--------|-------------|------|-------------------------------------------------------------|----------|
| O994_RS09100 | EF2160 | <i>glnR</i> | 2.0  | glutamine synthetase repressor                              | 9.50E-06 |
| O994_RS10010 | EF2428 |             | 1.6  | PadR family regulatory protein                              | 1.80E-02 |
| O994_RS10200 | EF2469 |             | 1.7  | Cro/CI family transcriptional regulator                     | 3.40E-02 |
| O994_RS10575 | EF2583 |             | 1.8  | transcriptional regulator                                   | 1.10E-03 |
| O994_RS10830 | EF2640 |             | 2.3  | GntR family transcriptional regulator                       | 9.40E-06 |
| O994_RS11140 | EF2703 |             | 4.5  | LytR family transcriptional regulator                       | 2.70E-20 |
| O994_RS11460 | EF2774 |             | 2.2  | helix-turn-helix transcriptional regulator                  | 2.70E-05 |
| O994_RS11720 | EF2886 |             | 2.4  | MarR family transcriptional regulator                       | 7.70E-17 |
| O994_RS01385 | EF3002 |             | 2.1  | transcriptional regulator                                   | 3.60E-05 |
| O994_RS01110 | EF3049 |             | 3.6  | RpiR family phosphosugar-binding transcriptional regulator  | 7.30E-17 |
| O994_RS01060 | EF3059 |             | 2.8  | TetR family transcriptional regulator                       | 1.20E-18 |
| O994_RS00540 | EF3175 |             | 3.8  | Rrf2 family transcriptional regulator                       | 4.90E-12 |
| O994_RS00125 | EF3272 |             | 1.8  | zinc-binding Cro/CI family transcriptional regulator        | 6.40E-03 |
| O994_RS00075 | EF3283 | <i>ctsR</i> | 3.3  | transcriptional regulator of stress and heat shock response | 4.20E-25 |
| O994_RS13630 | EF0107 |             | -4.4 | arginine deiminase pathway regulator                        | 7.60E-08 |
| O994_RS12635 | EF0372 |             | -1.8 | DNA-binding response regulator                              | 8.20E-03 |
| O994_RS12595 | EF0382 |             | -1.5 | purine catabolism regulatory protein                        | 8.60E-02 |
| O994_RS02070 | EF0663 |             | -2.7 | YebC/PmpR family DNA-binding transcriptional regulator      | 2.00E-22 |
| O994_RS02140 | EF0676 | <i>argR</i> | -1.9 | transcriptional regulator of arginine metabolism            | 1.90E-05 |
| O994_RS02450 | EF0731 |             | -2.7 | LuxR family transcriptional regulator                       | 3.30E-11 |
| O994_RS02860 | EF0828 |             | -3.8 | transcription antiterminator                                | 4.90E-13 |
| O994_RS03480 | EF0954 |             | -1.8 | LacI family sugar-binding transcriptional regulator         | 1.90E-07 |
| O994_RS05570 | EF1357 |             | -2.8 | AraC family transcriptional regulator                       | 7.60E-08 |
| O994_RS06375 | EF1515 |             | -2.1 | $\beta$ -glucoside operon transcriptional antiterminator    | 1.70E-03 |
| O994_RS06760 | EF1591 |             | -4.0 | AraC family transcriptional regulator                       | 1.60E-29 |
| O994_RS07060 | EF1656 |             | -4.7 | LysR family transcriptional regulator                       | 5.20E-30 |
| O994_RS14740 | EF1709 |             | -1.8 | GntR family transcriptional regulator                       | 3.30E-02 |
| O994_RS07315 | EF1709 |             | -2.2 | GntR family transcriptional regulator                       | 1.20E-07 |
| O994_RS01690 | EF1839 | <i>lacR</i> | -2.5 | lactose phosphotransferase system repressor                 | 1.30E-11 |
| O994_RS08375 | EF1955 |             | -2.3 | $\sigma$ -54 dependent transcriptional regulator            | 2.10E-07 |

|              |        |             |      |                                                            |           |
|--------------|--------|-------------|------|------------------------------------------------------------|-----------|
| O994_RS09320 | EF2207 |             | -2.5 | Fis family transcriptional regulator                       | 3.20E-08  |
| O994_RS12030 | EF2966 |             | -8.9 | mltR-like mannitol-operon transcriptional regulator        | 9.10E-125 |
| O994_RS00680 | EF3144 |             | -1.8 | RpiR family phosphosugar-binding transcriptional regulator | 4.20E-02  |
| O994_RS00355 | EF3216 |             | -2.9 | $\sigma$ -54-interacting transcriptional regulator         | 4.90E-18  |
| O994_RS00100 | EF3278 |             | -1.5 | PucR family transcriptional regulator                      | 2.20E-02  |
| O994_RS14250 | EF3308 | <i>srlR</i> | -5.4 | transcriptional regulator                                  | 8.70E-16  |
| O994_RS14245 | EF3309 | <i>srlM</i> | -5.7 | lichenan operon transcriptional antiterminator             | 4.80E-37  |
| O994_RS14150 | EF3328 | <i>citO</i> | -3.7 | GntR family transcriptional regulator                      | 1.80E-29  |

### **Translation**

|              |        |               |     |                                                             |          |
|--------------|--------|---------------|-----|-------------------------------------------------------------|----------|
| O994_RS12980 | EF0263 |               | 3.2 | tRNA(Ile)-lysidine synthase                                 | 1.10E-21 |
| O994_RS12960 | EF0267 |               | 3.3 | zinc-binding NifR3 family TIM-barrel protein                | 1.20E-19 |
| O994_RS02110 | EF0670 |               | 3.2 | rRNA pseudouridine synthase                                 | 8.60E-13 |
| O994_RS02155 | EF0679 |               | 2.1 | RluA family pseudouridine synthase                          | 1.10E-03 |
| O994_RS02270 | EF0701 | <i>prfc</i>   | 2.3 | peptide chain release factor 3                              | 3.60E-06 |
| O994_RS02530 | EF0748 | <i>trhO</i>   | 1.8 | tRNA uridine(34) hydroxylase                                | 1.10E-03 |
| O994_RS03465 | EF0950 |               | 4.1 | tRNA threonylcarbamoyladenine biosynthesis protein          | 2.40E-11 |
| O994_RS03655 | EF0989 | <i>rsmH</i>   | 2.5 | 16S rRNA (cytosine(1402)-N(4))-methyltransferase            | 2.40E-22 |
| O994_RS05095 | EF1265 |               | 2.8 | 23S rRNA (cytosine1962-C5)-methyltransferase                | 1.80E-13 |
| O994_RS07025 | EF1649 | <i>gid</i>    | 2.3 | tRNA (uracil-5-)-methyltransferase                          | 1.60E-07 |
| O994_RS07415 | EF1730 |               | 1.8 | Cys-tRNA(Pro)/Cys-tRNA(Cys) deacylase                       | 1.70E-03 |
| O994_RS09110 | EF2162 | <i>miaA</i>   | 1.6 | tRNA $\delta$ (2)-isopentenylpyrophosphate transferase      | 7.70E-02 |
| O994_RS09610 | EF2371 | <i>asnS</i>   | 1.5 | asparaginyl-tRNA synthetase                                 | 4.80E-02 |
| O994_RS09645 | EF2379 | <i>proS</i>   | 1.5 | prolyl-tRNA synthetase                                      | 3.10E-02 |
| O994_RS10135 | EF2452 | <i>rsmD</i>   | 1.6 | 16S rRNA (guanine(966)-N(2))-methyltransferase              | 6.40E-03 |
| O994_RS10225 | EF2474 |               | 1.6 | [ribosomal protein S18]-alanine <i>N</i> -acetyltransferase | 5.90E-02 |
| O994_RS11010 | EF2679 | <i>trpS</i>   | 2.6 | tryptophanyl-tRNA synthetase                                | 1.10E-10 |
| O994_RS11155 | EF2706 |               | 1.8 | 23S rRNA (uracil(1939)-C(5))-methyltransferase              | 1.90E-02 |
| O994_RS11255 | EF2731 | <i>rpmG-2</i> | 3.5 | 50S ribosomal protein L33                                   | 1.20E-12 |
| O994_RS11575 | EF2856 | <i>rpmG-3</i> | 2.1 | 50S ribosomal protein L33                                   | 1.20E-07 |
| O994_RS11655 | EF2873 | <i>yqeH</i>   | 2.3 | 30S ribosome assembly GTPase                                | 3.10E-08 |
| O994_RS00390 | EF3207 |               | 2.2 | dihydrouridine synthase                                     | 2.30E-04 |

|              |        |               |      |                                                   |          |
|--------------|--------|---------------|------|---------------------------------------------------|----------|
| O994_RS14285 | EF3300 | <i>gidB</i>   | 2.3  | 16S rRNA methyltransferase                        | 2.60E-04 |
| O994_RS13905 | EF0045 | <i>cysS</i>   | -1.6 | cysteinyl-tRNA synthetase                         | 3.30E-03 |
| O994_RS13895 | EF0047 | <i>rlmB</i>   | -1.9 | 23S rRNA (guanosine(2251)-2'-O)-methyltransferase | 4.30E-07 |
| O994_RS13665 | EF0100 | <i>serS-1</i> | -5.1 | seryl-tRNA synthetase                             | 1.50E-73 |
| O994_RS13290 | EF0198 | <i>rpsL</i>   | -1.8 | 30S ribosomal protein S12                         | 3.60E-03 |
| O994_RS13285 | EF0199 | <i>rpsG</i>   | -2.3 | 30S ribosomal protein S7                          | 1.10E-06 |
| O994_RS13260 | EF0205 | <i>rpsJ</i>   | -2.0 | 30S ribosomal protein S10                         | 4.80E-05 |
| O994_RS13255 | EF0206 | <i>rplC</i>   | -2.3 | 50S ribosomal protein L3                          | 4.90E-08 |
| O994_RS13250 | EF0207 | <i>rplD</i>   | -2.5 | 50S ribosomal protein L4                          | 4.60E-11 |
| O994_RS13245 | EF0208 | <i>rplW</i>   | -2.4 | 50S ribosomal protein L23                         | 3.00E-08 |
| O994_RS13240 | EF0209 | <i>rplB</i>   | -2.7 | 50S ribosomal protein L2                          | 2.50E-12 |
| O994_RS13235 | EF0210 | <i>rpsS</i>   | -2.7 | 30S ribosomal protein S19                         | 8.00E-11 |
| O994_RS13230 | EF0211 | <i>rplV</i>   | -2.7 | 50S ribosomal protein L22                         | 8.10E-12 |
| O994_RS13225 | EF0212 | <i>rpsC</i>   | -2.8 | 30S ribosomal protein S3                          | 1.40E-12 |
| O994_RS13220 | EF0213 | <i>rplP</i>   | -2.9 | 50S ribosomal protein L16                         | 1.20E-16 |
| O994_RS13215 | EF0214 | <i>rpmC</i>   | -3.0 | 50S ribosomal protein L29                         | 1.70E-15 |
| O994_RS13210 | EF0215 | <i>rpsQ</i>   | -2.9 | 30S ribosomal protein S3                          | 2.20E-16 |
| O994_RS13205 | EF0216 | <i>rplN</i>   | -3.1 | 50S ribosomal protein L14                         | 1.20E-18 |
| O994_RS13200 | EF0217 | <i>rplX</i>   | -3.2 | 50S ribosomal protein L24                         | 2.20E-20 |
| O994_RS13195 | EF0218 | <i>rplE</i>   | -3.1 | 50S ribosomal protein L5                          | 6.50E-23 |
| O994_RS13185 | EF0220 | <i>rpsH</i>   | -3.3 | 30S ribosomal protein S8                          | 2.60E-21 |
| O994_RS13180 | EF0221 | <i>rplF</i>   | -3.3 | 50S ribosomal protein L6                          | 9.50E-28 |
| O994_RS13175 | EF0223 | <i>rplR</i>   | -3.3 | 50S ribosomal protein L18                         | 4.00E-33 |
| O994_RS13170 | EF0224 | <i>rpsE</i>   | -3.4 | 30S ribosomal protein S5                          | 4.40E-25 |
| O994_RS13165 | EF0225 | <i>rpmD</i>   | -3.3 | 50S ribosomal protein L30                         | 7.50E-24 |
| O994_RS13160 | EF0226 | <i>rplO</i>   | -3.5 | 50S ribosomal protein L15                         | 8.10E-30 |
| O994_RS13145 | EF0229 | <i>infA</i>   | -1.9 | translation initiation factor IF-1                | 1.10E-03 |
| O994_RS13140 | EF0230 | <i>rpmJ</i>   | -2.1 | 50S ribosomal protein L36                         | 3.60E-06 |
| O994_RS13135 | EF0231 | <i>rpsM</i>   | -2.2 | 30S ribosomal protein S13                         | 1.20E-07 |
| O994_RS13130 | EF0232 | <i>rpsK</i>   | -2.2 | 30S ribosomal protein S11                         | 2.30E-07 |

|              |        |               |      |                                                              |          |
|--------------|--------|---------------|------|--------------------------------------------------------------|----------|
| O994_RS13120 | EF0234 | <i>rplQ</i>   | -2.2 | 50S ribosomal protein L17                                    | 4.70E-08 |
| O994_RS02420 | EF0725 | <i>gatA</i>   | -1.4 | Asp-tRNA/Glu-tRNA amidotransferase                           | 6.30E-02 |
| O994_RS02425 | EF0726 | <i>gatB</i>   | -1.7 | aspartyl/glutamyl-tRNA amidotransferase                      | 1.90E-05 |
| O994_RS02780 | EF0801 | <i>leuS</i>   | -1.5 | leucyl-tRNA synthetase                                       | 2.60E-03 |
| O994_RS02915 | EF0838 |               | -2.1 | pyridoxal phosphate-dependent enzyme                         | 3.50E-03 |
| O994_RS05135 | EF1274 | <i>infB</i>   | -1.5 | translation initiation factor IF-2                           | 2.70E-02 |
| O994_RS05140 | EF1275 | <i>rbfA</i>   | -1.5 | ribosome-binding factor A                                    | 5.00E-02 |
| O994_RS07250 | EF1694 | <i>rpsP</i>   | -2.4 | 30S ribosomal protein S16                                    | 2.60E-09 |
| O994_RS07595 | EF1764 | <i>yfiA</i>   | -1.6 | ribosomal subunit interface protein                          | 9.10E-03 |
| O994_RS09860 | EF2395 | <i>frr</i>    | -2.7 | ribosome recycling factor                                    | 3.70E-16 |
| O994_RS09905 | EF2406 | <i>glyS</i>   | -1.6 | glycyl-tRNA synthetase subunit $\beta$                       | 5.70E-03 |
| O994_RS11185 | EF2715 | <i>rplL</i>   | -2.9 | 50S ribosomal protein L7/L12                                 | 8.20E-27 |
| O994_RS11190 | EF2716 | <i>rplJ</i>   | -2.7 | 50S ribosomal protein L10                                    | 1.40E-17 |
| O994_RS11195 | EF2718 | <i>rplA</i>   | -1.4 | 50S ribosomal protein L1                                     | 4.30E-02 |
| O994_RS11955 | EF2931 | <i>valS</i>   | -1.7 | valyl-tRNA synthetase                                        | 1.20E-04 |
| O994_RS01220 | EF3025 | <i>rlmH</i>   | -2.0 | 23S rRNA (pseudouridine1915-N3)-methyltransferase            | 1.00E-05 |
| O994_RS00415 | EF3202 | <i>rpsN</i>   | -3.2 | 30S ribosomal protein S14                                    | 8.30E-23 |
| O994_RS14325 | EF3292 | <i>serS-2</i> | -2.6 | seryl-tRNA synthetase                                        | 4.20E-18 |
| O994_RS14235 | EF3311 | <i>gidA</i>   | -1.9 | tRNA uridine 5-carboxymethylaminomethyl modification protein | 4.10E-04 |

#### **Unclassified: genetic information processing**

|              |        |             |     |                                          |          |
|--------------|--------|-------------|-----|------------------------------------------|----------|
| O994_RS12985 | EF0262 |             | 2.7 | hypothetical protein                     | 1.80E-15 |
| O994_RS12145 | EF0473 | <i>nrdH</i> | 2.2 | ribonucleoside-diphosphate reductase 2   | 1.70E-10 |
| O994_RS05375 | EF1312 |             | 1.4 | S1 RNA-binding domain-containing protein | 3.50E-02 |
| O994_RS08550 | EF1991 | <i>cspC</i> | 1.5 | cold shock protein                       | 4.40E-02 |
| O994_RS11000 | EF2677 | <i>mecA</i> | 2.1 | adaptor protein                          | 2.00E-08 |

|              |        |  |      |                      |          |
|--------------|--------|--|------|----------------------|----------|
| O994_RS10480 | EF2563 |  | -5.6 | hypothetical protein | 7.90E-13 |
|--------------|--------|--|------|----------------------|----------|

#### **Unclassified: metabolism**

|              |        |             |     |                                        |          |
|--------------|--------|-------------|-----|----------------------------------------|----------|
| O994_RS02575 | EF0758 |             | 1.8 | cadmium-translocating P-type ATPase    | 4.30E-02 |
| O994_RS04905 | EF1225 | <i>apbE</i> | 2.0 | thiamin biosynthesis                   | 5.90E-05 |
| O994_RS05105 | EF1268 |             | 2.8 | cation transporter E1-E2 family ATPase | 4.40E-28 |



|                                                         |        |               |      |                                                               |           |
|---------------------------------------------------------|--------|---------------|------|---------------------------------------------------------------|-----------|
| O994_RS05290                                            | EF1304 | <i>mgtA-2</i> | 4.4  | magnesium-translocating P-type ATPase                         | 1.80E-37  |
| O994_RS05370                                            | EF1311 |               | 2.1  | hypothetical protein                                          | 2.50E-08  |
| O994_RS05790                                            | EF1400 |               | 1.8  | cadmium-translocating P-type ATPase                           | 5.70E-03  |
| O994_RS06425                                            | EF1519 |               | 3.4  | cation transporter E1-E2 family ATPase                        | 1.60E-27  |
| O994_RS07185                                            | EF1681 | <i>msrA</i>   | 1.8  | peptide methionine sulfoxide reductase                        | 2.30E-05  |
| O994_RS09085                                            | EF2157 |               | 2.1  | hypothetical protein                                          | 3.30E-09  |
| O994_RS10355                                            | EF2501 |               | 3.1  | arsenate reductase                                            | 8.00E-20  |
| O994_RS10655                                            | EF2601 |               | 1.6  | acyl carrier protein                                          | 3.80E-02  |
| O994_RS01390                                            | EF3001 |               | 1.9  | protease synthase and sporulation negative regulatory protein | 1.40E-03  |
| O994_RS00595                                            | EF3164 | <i>msrB</i>   | 3.4  | methionine sulfoxide reductase B                              | 1.20E-18  |
| O994_RS14275                                            | EF3303 |               | 2.1  | myosin-cross-reactive antigen                                 | 9.70E-13  |
| O994_RS14075                                            | EF0011 |               | -2.0 | DHH family protein                                            | 6.30E-09  |
| O994_RS12375                                            | EF0426 |               | -3.0 | gluconate 5-dehydrogenase                                     | 1.90E-08  |
| O994_RS03095                                            | EF0875 |               | -1.6 | copper-translocating P-type ATPase                            | 6.00E-03  |
| O994_RS05530                                            | EF1348 |               | -2.3 | glucan 1                                                      | 5.50E-11  |
| O994_RS09740                                            | EF1511 |               | -2.1 | mandelate racemase                                            | 4.00E-03  |
| O994_RS07755                                            | EF1800 |               | -1.5 | hypothetical protein                                          | 8.50E-02  |
| O994_RS08225                                            | EF1921 | <i>rihC</i>   | -5.0 | ribonucleoside hydrolase                                      | 1.20E-30  |
| O994_RS10470                                            | EF2561 |               | -5.2 | ferredoxin-NADP(+) reductase subunit $\alpha$                 | 2.20E-31  |
| O994_RS11295                                            | EF2739 | <i>ahpC</i>   | -1.5 | alkyl hydroperoxide reductase subunit C                       | 5.40E-04  |
| O994_RS00750                                            | EF3129 |               | -1.6 | D-alanyl-D-alanine carboxypeptidase                           | 5.80E-03  |
| O994_RS00695                                            | EF3140 |               | -7.1 | iron-containing alcohol dehydrogenase                         | 3.90E-25  |
| <b><u>Xenobiotics biodegradation and metabolism</u></b> |        |               |      |                                                               |           |
| O994_RS11590                                            | EF2859 |               | 2.2  | 4-oxalocrotonate tautomerase                                  | 1.30E-03  |
| O994_RS02475                                            | EF0737 |               | 5.5  | amidase                                                       | 4.80E-105 |
| O994_RS11590                                            | EF2859 |               | 2.2  | 4-oxalocrotonate tautomerase                                  | 1.30E-03  |
| <b><u>JH2-2 Specific Genes</u></b>                      |        |               |      |                                                               |           |
| O994_RS01040                                            |        |               | 2.2  | ABC transporter permease                                      | 6.60E-05  |
| O994_RS01045                                            |        |               | 5.1  | $\alpha/\beta$ hydrolase                                      | 8.60E-39  |
| O994_RS01050                                            |        |               | 2.0  | GNAT family <i>N</i> -acetyltransferase                       | 1.20E-05  |

|              |             |      |                                             |          |
|--------------|-------------|------|---------------------------------------------|----------|
| O994_RS01355 |             | 1.8  | ABC transporter permease                    | 1.00E-02 |
| O994_RS01705 |             | 3.2  | hypothetical protein                        | 1.00E-09 |
| O994_RS01800 | <i>uvrB</i> | 3.0  | DNA helicase                                | 6.50E-08 |
| O994_RS01805 |             | 1.6  | tRNA-al                                     | 4.40E-02 |
| O994_RS01810 |             | 1.6  | hypothetical protein                        | 1.70E-02 |
| O994_RS02075 |             | 3.0  | hypothetical protein                        | 2.30E-06 |
| O994_RS03850 |             | 3.9  | hypothetical protein                        | 9.40E-11 |
| O994_RS06250 |             | 2.2  | IS30-like element IS6770 family transposase | 7.50E-04 |
| O994_RS06415 |             | 3.3  | hypothetical protein                        | 2.80E-14 |
| O994_RS07475 |             | 2.7  | ABC transporter permease                    | 6.70E-08 |
| O994_RS08365 |             | 2.3  | hypothetical protein                        | 7.40E-07 |
| O994_RS08370 | <i>mreC</i> | 4.4  | rod shape-determining protein               | 7.70E-37 |
| O994_RS08380 | <i>mreD</i> | 4.4  | rod shape-determining protein               | 8.20E-15 |
| O994_RS09570 |             | 2.8  | hypothetical protein                        | 1.20E-09 |
| O994_RS12175 |             | 4.1  | hypothetical protein                        | 2.90E-20 |
| O994_RS13455 |             | 1.6  | type 1 glutamine amidotransferase           | 7.60E-02 |
| O994_RS14175 |             | 6.1  | hypothetical protein                        | 1.20E-59 |
| O994_RS14525 |             | 3.4  | hypothetical protein                        | 4.30E-12 |
| O994_RS14560 |             | 2.0  | hypothetical protein                        | 2.50E-05 |
| O994_RS14915 |             | 3.0  | hypothetical protein                        | 1.10E-08 |
| O994_RS14975 |             | 5.4  | hypothetical protein                        | 2.40E-95 |
| O994_RS14980 |             | 8.3  | hypothetical protein                        | 1.60E-16 |
| O994_RS15025 |             | 3.8  | recombinase family protein                  | 5.10E-19 |
| O994_RS00340 | <i>lacC</i> | -6.2 | tagatose-6-phosphate kinase                 | 2.10E-17 |
| O994_RS00345 |             | -7.2 | PTS sugar transporter subunit IIB           | 1.90E-18 |
| O994_RS00660 |             | -7.0 | PTS fructose transporter subunit IIA        | 2.90E-14 |
| O994_RS01230 |             | -1.7 | PD-(D/E)XK motif protein                    | 5.40E-04 |
| O994_RS01545 |             | -1.7 | AIPR family protein                         | 8.60E-05 |
| O994_RS01815 |             | -2.2 | tRNA-Ile                                    | 1.90E-04 |
| O994_RS03080 |             | -3.6 | type I restriction endonuclease subunit R   | 2.10E-44 |

|              |      |                                               |          |
|--------------|------|-----------------------------------------------|----------|
| O994_RS04000 | -1.6 | DUF262 domain-containing protein              | 5.50E-02 |
| O994_RS04075 | -1.9 | multicopper oxidase domain-containing protein | 4.50E-05 |
| O994_RS06245 | -6.5 | hypothetical protein                          | 6.20E-74 |
| O994_RS08540 | -2.0 | hypothetical protein                          | 7.30E-06 |
| O994_RS13460 | -5.7 | hypothetical protein                          | 1.60E-50 |
| O994_RS13620 | -6.3 | hypothetical protein                          | 4.00E-54 |
| O994_RS14690 | -1.8 | DDE-type integrase/transposase/recombinase    | 3.50E-03 |
| O994_RS14750 | -1.4 | hypothetical protein                          | 2.20E-02 |
| O994_RS14770 | -2.3 | hypothetical protein                          | 3.50E-07 |
| O994_RS14805 | -3.0 | hypothetical protein                          | 1.30E-15 |
| O994_RS14955 | -7.9 | hypothetical protein                          | 3.20E-10 |
| O994_RS14965 | -1.6 | hypothetical protein                          | 8.60E-02 |

---

Table S4. Genes differentially expressed in *E. faecalis*  $\Delta$ *croRS* in the presence versus absence of TXB.

| JH2-2 Locus Tag                | V583 Gene | Gene Name     | F/C (log <sub>2</sub> ) | Gene Function                                               | P <sub>adj</sub> |
|--------------------------------|-----------|---------------|-------------------------|-------------------------------------------------------------|------------------|
| <b>Amino acid Metabolism</b>   |           |               |                         |                                                             |                  |
| O994_RS02475                   | EF0737    |               | 2.4                     | amidase                                                     | 8.30E-11         |
| O994_RS04600                   | EF1163    |               | 1.5                     | L-asparaginase                                              | 3.90E-02         |
| O994_RS13680                   | EF0097    | <i>pfoR</i>   | -3.1                    | regulatory protein                                          | 9.50E-10         |
| O994_RS13675                   | EF0098    | <i>sdhB-1</i> | -3.4                    | L-serine dehydratase, iron-sulfur-dependent subunit $\beta$ | 6.10E-10         |
| O994_RS13670                   | EF0099    | <i>sdhA-1</i> | -3.5                    | iron-sulfur-dependent L-serine dehydratase subunit $\alpha$ | 2.00E-14         |
| O994_RS13600                   | EF0115    |               | -2.7                    | endoribonuclease L-PSP                                      | 2.60E-05         |
| O994_RS03180                   | EF0891    |               | -2.1                    | aspartate aminotransferase                                  | 2.10E-04         |
| O994_RS05390                   | EF1314    | <i>alaT</i>   | -1.6                    | aminotransferase                                            | 6.90E-03         |
| O994_RS06620                   | EF1561    | <i>aroE</i>   | -2.3                    | shikimate 5-dehydrogenase                                   | 7.10E-09         |
| O994_RS06625                   | EF1562    |               | -2.1                    | 3-deoxy-7-phosphoheptulonate synthase                       | 1.70E-07         |
| O994_RS06630                   | EF1563    | <i>aroB</i>   | -1.8                    | 3-dehydroquinate synthase                                   | 8.80E-03         |
| O994_RS06635                   | EF1564    | <i>aroC</i>   | -2.1                    | chorismate synthase                                         | 5.90E-04         |
| O994_RS06640                   | EF1565    |               | -2.2                    | prephenate dehydrogenase                                    | 2.10E-05         |
| O994_RS06645                   | EF1566    | <i>aroA</i>   | -2.1                    | 3-phosphoshikimate 1-carboxyvinyltransferase                | 7.60E-06         |
| O994_RS06650                   | EF1567    | <i>aroK</i>   | -2.4                    | shikimate kinase                                            | 4.50E-10         |
| O994_RS06655                   | EF1568    |               | -2.6                    | prephenate dehydratase                                      | 2.90E-10         |
| O994_RS06885                   | EF1617    |               | -1.7                    | hypothetical protein                                        | 9.70E-02         |
| O994_RS06930                   | EF1626    | <i>eutL</i>   | -2.0                    | ethanolamine utilization protein                            | 1.20E-02         |
| O994_RS06960                   | EF1634    | <i>pduU</i>   | -2.0                    | propanediol utilization protein                             | 2.70E-03         |
| O994_RS06975                   | EF1638    | <i>pduV</i>   | -2.6                    | propanediol utilization protein                             | 4.70E-06         |
| <b>Autolysis</b>               |           |               |                         |                                                             |                  |
| O994_RS12300                   | EF0443    |               | 4.1                     | LysM domain-containing protein                              | 1.30E-17         |
| O994_RS02775                   | EF0799    |               | -2.2                    | autolysin                                                   | 6.30E-07         |
| <b>Carbohydrate Metabolism</b> |           |               |                         |                                                             |                  |
| O994_RS02385                   | EF0718    | <i>pfkB</i>   | 2.1                     | 1-phosphofructokinase                                       | 2.80E-06         |

|              |        |               |      |                                                     |          |
|--------------|--------|---------------|------|-----------------------------------------------------|----------|
| O994_RS03410 | EF0939 | <i>mgsA</i>   | 1.6  | methylglyoxal synthase                              | 7.20E-03 |
| O994_RS05845 | EF1411 |               | 3.1  | 6-phospho- $\beta$ -glucosidase                     | 3.10E-17 |
| O994_RS06455 | EF1526 | <i>gap-1</i>  | 1.8  | glyceraldehyde 3-phosphate dehydrogenase            | 1.00E-04 |
| O994_RS06790 | EF1597 | <i>katA</i>   | 4.3  | catalase/oxidase                                    | 2.00E-46 |
| O994_RS14270 | EF3304 | <i>mipB</i>   | 2.5  | fructose-6-phosphate aldolase                       | 3.60E-07 |
| O994_RS13605 | EF0114 |               | -1.8 | glycosyl hydrolase                                  | 4.10E-05 |
| O994_RS13385 | EF0174 | <i>deoC</i>   | -1.6 | 2-deoxyribose-5-phosphate aldolase                  | 7.90E-02 |
| O994_RS13295 | EF0197 | <i>rpiA</i>   | -1.6 | ribose-5-phosphate isomerase A                      | 1.60E-02 |
| O994_RS13025 | EF0253 |               | -2.5 | aldehyde dehydrogenase                              | 9.70E-05 |
| O994_RS12860 | EF0271 | <i>arb</i>    | -2.1 | 6-phospho- $\beta$ -glucosidase                     | 2.30E-02 |
| O994_RS12855 | EF0272 |               | -2.3 | glycosyl hydrolase                                  | 5.10E-05 |
| O994_RS12440 | EF0413 | <i>mtlD</i>   | -3.4 | mannitol-1-phosphate 5-dehydrogenase                | 8.30E-15 |
| O994_RS01960 | EF0641 | <i>ldh2</i>   | -2.3 | L-lactate dehydrogenase                             | 2.60E-05 |
| O994_RS02145 | EF0677 |               | -1.5 | phosphoglucomutase/ phosphomannomutase              | 8.50E-02 |
| O994_RS03215 | EF0900 | <i>adhE</i>   | -2.5 | bifunctional acetaldehyde-CoA/alcohol dehydrogenase | 1.20E-06 |
| O994_RS03460 | EF0949 | <i>eutD</i>   | -1.9 | phosphotransacetylase                               | 8.90E-04 |
| O994_RS04150 | EF1069 | <i>galK</i>   | -2.2 | galactokinase                                       | 3.40E-03 |
| O994_RS04155 | EF1070 | <i>galE-1</i> | -2.1 | UDP-glucose 4-epimerase                             | 1.40E-02 |
| O994_RS04330 | EF1108 | <i>lutA</i>   | -2.1 | oxidoreductase                                      | 4.10E-03 |
| O994_RS04335 | EF1109 |               | -2.0 | iron-sulfur cluster binding protein                 | 4.80E-03 |
| O994_RS04340 | EF1110 |               | -1.5 | YkgG family protein                                 | 8.80E-02 |
| O994_RS01725 | EF1243 |               | -2.2 | glycosyl hydrolase                                  | 2.20E-03 |
| O994_RS05525 | EF1347 |               | -1.6 | glycosyl hydrolase                                  | 9.00E-02 |
| O994_RS05535 | EF1349 |               | -2.4 | glycosyl hydrolase                                  | 6.00E-06 |
| O994_RS05575 | EF1358 | <i>gldA</i>   | -2.2 | glycerol dehydrogenase                              | 5.90E-07 |
| O994_RS06865 | EF1613 | <i>pflB</i>   | -3.4 | formate acetyltransferase                           | 7.40E-03 |
| O994_RS06875 | EF1618 | <i>eutH</i>   | -2.2 | ethanolamine utilization protein                    | 4.20E-06 |
| O994_RS06905 | EF1621 |               | -2.1 | phosphate propanoyltransferase                      | 1.20E-02 |
| O994_RS06945 | EF1630 | <i>eutA</i>   | -2.1 | ethanolamine utilisation protein                    | 1.40E-02 |
| O994_RS06965 | EF1635 | <i>pduQ</i>   | -2.2 | propanol dehydrogenase                              | 6.50E-03 |

|                                              |        |               |      |                                                                |          |
|----------------------------------------------|--------|---------------|------|----------------------------------------------------------------|----------|
| O994_RS01700                                 | EF1834 | <i>lacB</i>   | -3.6 | galactose-6-phosphate isomerase subunit                        | 9.80E-19 |
| O994_RS01695                                 | EF1835 | <i>lacA</i>   | -3.6 | galactose-6-phosphate isomerase subunit                        | 9.50E-18 |
| O994_RS09055                                 | EF2151 | <i>glmS</i>   | -1.5 | glucosamine--fructose-6-phosphate aminotransferase             | 8.80E-03 |
| O994_RS10285                                 | EF2487 | <i>glf</i>    | -2.3 | UDP-galactopyranose mutase                                     | 2.80E-07 |
| O994_RS10350                                 | EF2500 |               | -1.7 | GcvH family protein                                            | 2.60E-02 |
| O994_RS10460                                 | EF2559 |               | -2.1 | pyruvate flavodoxin/ferredoxin oxidoreductase family protein   | 7.00E-06 |
| O994_RS12005                                 | EF2961 | <i>rbsK</i>   | -2.4 | ribokinase                                                     | 5.30E-07 |
| O994_RS00720                                 | EF3135 | <i>uxuA</i>   | -3.2 | mannonate dehydratase                                          | 6.00E-09 |
| O994_RS00715                                 | EF3136 |               | -3.0 | PTS system transporter subunit IIA                             | 8.80E-06 |
| O994_RS00700                                 | EF3139 |               | -3.0 | PTS system transporter subunit IIC                             | 1.90E-08 |
| O994_RS00690                                 | EF3141 |               | -2.9 | D-isomer specific 2-hydroxyacid dehydrogenase family protein   | 3.90E-08 |
| O994_RS00685                                 | EF3142 | <i>gnd</i>    | -2.4 | 6-phosphogluconate dehydrogenase                               | 2.00E-04 |
| O994_RS00615                                 | EF3158 | <i>pgmB</i>   | -3.3 | HAD superfamily hydrolase                                      | 6.30E-18 |
| O994_RS00600                                 | EF3163 | <i>prsA-2</i> | -2.0 | ribose-phosphate pyrophosphokinase                             | 5.50E-05 |
| O994_RS14205                                 | EF3317 | <i>citM</i>   | -2.4 | oxaloacetate decarboxylase                                     | 4.40E-06 |
| O994_RS14170                                 | EF3324 |               | -1.9 | sodium ion-translocating decarboxylase subunit $\beta$         | 1.30E-02 |
| O994_RS14165                                 | EF3325 |               | -4.3 | acetyl-CoA carboxylase biotin carboxyl carrier protein subunit | 3.10E-13 |
| <b><u>Cellular community</u></b>             |        |               |      |                                                                |          |
| O994_RS01710                                 | EF1807 | <i>lacD-2</i> | -3.4 | tagatose 1,6-diphosphate aldolase                              | 1.80E-13 |
| O994_RS00880                                 | EF3106 | <i>opp2A</i>  | -3.1 | oligopeptide ABC transporter substrate-binding protein         | 9.90E-19 |
| O994_RS00875                                 | EF3107 | <i>opp2C</i>  | -3.6 | oligopeptide ABC transporter permease                          | 3.70E-23 |
| O994_RS00865                                 | EF3109 | <i>opp2F</i>  | -4.2 | oligopeptide ABC transporter ATP-binding protein               | 2.50E-31 |
| O994_RS00860                                 | EF3110 | <i>opp2D</i>  | -3.9 | oligopeptide ABC transporter ATP-binding protein               | 2.50E-31 |
| <b><u>Drug resistance: antimicrobial</u></b> |        |               |      |                                                                |          |
| O994_RS11105                                 | EF2698 | <i>tela</i>   | 3.4  | tellurite resistance protein                                   | 1.80E-19 |
| <b><u>Energy Metabolism</u></b>              |        |               |      |                                                                |          |
| O994_RS06270                                 | EF1492 |               | 2.1  | V-type ATPase subunit F                                        | 6.70E-07 |
| O994_RS06275                                 | EF1493 |               | 1.9  | V-type ATP synthase subunit I                                  | 4.30E-06 |
| O994_RS06280                                 | EF1494 |               | 1.6  | V-type ATP synthase subunit K                                  | 2.10E-03 |
| O994_RS06285                                 | EF1495 |               | 1.6  | V-type ATPase subunit E                                        | 3.00E-03 |
| O994_RS06290                                 | EF1496 |               | 1.6  | V-type ATPase subunit C                                        | 8.80E-03 |

|                                                  |        |               |      |                                                                    |          |
|--------------------------------------------------|--------|---------------|------|--------------------------------------------------------------------|----------|
| O994_RS06310                                     | EF1500 |               | 1.6  | V-type ATP synthase subunit D                                      | 7.40E-03 |
| O994_RS05865                                     | EF1415 | <i>gdhA</i>   | -1.8 | glutamate dehydrogenase                                            | 1.10E-03 |
| O994_RS10465                                     | EF2560 | <i>gltA</i>   | -2.9 | oxidoreductase                                                     | 6.90E-07 |
| O994_RS00200                                     | EF3257 |               | -1.8 | pyridine nucleotide-disulfide family oxidoreductase                | 2.20E-02 |
| <b><u>Folding, sorting and degradation</u></b>   |        |               |      |                                                                    |          |
| O994_RS06545                                     | EF1545 | <i>recQ-1</i> | 1.8  | ATP-dependent DNA helicase                                         | 1.30E-02 |
| O994_RS13155                                     | EF0227 | <i>secY</i>   | -1.8 | preprotein translocase subunit                                     | 5.20E-08 |
| O994_RS03205                                     | EF0897 | <i>yajC</i>   | -1.6 | preprotein translocase subunit                                     | 5.50E-02 |
| <b><u>Glycan biosynthesis and metabolism</u></b> |        |               |      |                                                                    |          |
| O994_RS02085                                     | EF0666 |               | 1.6  | glyoxalase                                                         | 2.60E-03 |
| O994_RS02160                                     | EF0680 |               | 3.1  | penicillin-binding protein 2A                                      | 2.40E-17 |
| O994_RS11345                                     | EF2750 | <i>dltX</i>   | 3.1  | teichoic acid D-ala incorporation-associated protein               | 3.50E-30 |
| O994_RS12535                                     | EF0394 | <i>salB</i>   | -3.0 | peptidoglycan DL-endopeptidase                                     | 4.80E-14 |
| O994_RS04630                                     | EF1169 | <i>murAB</i>  | -1.8 | UDP-N-acetylglucosamine 1-carboxyvinyltransferase                  | 1.70E-03 |
| O994_RS04645                                     | EF1172 |               | -2.1 | teichoic acid biosynthesis protein                                 | 2.50E-05 |
| O994_RS09170                                     | EF2174 |               | -2.5 | putative L-alanyl-D-glutamate peptidase                            | 7.50E-07 |
| O994_RS10070                                     | EF2440 |               | -2.3 | celC-like protein                                                  | 1.00E-05 |
| O994_RS14400                                     | EF2489 | <i>cspG</i>   | -2.8 | MurB family protein                                                | 1.80E-19 |
| O994_RS01055                                     | EF3060 |               | -2.4 | peptidoglycan DL-endopeptidase                                     | 1.30E-07 |
| <b><u>Lipid Metabolism</u></b>                   |        |               |      |                                                                    |          |
| O994_RS06840                                     | EF1608 |               | 1.6  | cardiolipin synthase                                               | 1.40E-02 |
| O994_RS08150                                     | EF1904 |               | 2.6  | glycerophosphoryl diester phosphodiesterase family protein         | 1.10E-10 |
| O994_RS11070                                     | EF2691 | <i>plsC</i>   | 2.2  | 1-acyl-sn-glycerol-3-phosphate acyltransferase                     | 4.20E-08 |
| O994_RS00665                                     | EF3148 | <i>pgsA</i>   | 1.5  | CDP-diacylglycerol--glycerol-3-phosphate 3-phosphatidyltransferase | 9.00E-02 |
| O994_RS05580                                     | EF1359 | <i>dhaM</i>   | -2.5 | dihydroxyacetone kinase                                            | 1.60E-09 |
| O994_RS05585                                     | EF1360 | <i>dhaK</i>   | -2.5 | dihydroxyacetone kinase                                            | 1.10E-09 |
| O994_RS05590                                     | EF1361 | <i>dhaL</i>   | -2.6 | dihydroxyacetone kinase                                            | 1.80E-10 |

|              |        |             |      |                                          |          |
|--------------|--------|-------------|------|------------------------------------------|----------|
| O994_RS06935 | EF1627 | <i>eutC</i> | -1.9 | ethanolamine ammonia-lyase small subunit | 1.70E-02 |
| O994_RS06940 | EF1629 | <i>eutB</i> | -1.8 | ethanolamine ammonia-lyase large subunit | 4.30E-02 |
| O994_RS08255 | EF1928 | <i>glpO</i> | -1.9 | $\alpha$ -glycerophosphate oxidase       | 7.40E-03 |
| O994_RS10860 | EF2646 |             | -2.5 | glycerate kinase                         | 3.10E-04 |

### **Membrane transport**

|              |        |  |     |                                                               |          |
|--------------|--------|--|-----|---------------------------------------------------------------|----------|
| O994_RS12425 | EF0417 |  | 2.6 | ABC transporter permease                                      | 1.40E-05 |
| O994_RS12420 | EF0418 |  | 2.4 | ABC transporter ATP-binding protein                           | 8.60E-05 |
| O994_RS02130 | EF0674 |  | 2.5 | glycine betaine/carnitine/choline ABC transporter             | 1.00E-10 |
| O994_RS02135 | EF0675 |  | 2.5 | glycine betaine/carnitine/choline ABC transporter             | 2.80E-09 |
| O994_RS02380 | EF0717 |  | 2.2 | PTS system fructose-specific transporter subunit IIABC        | 1.00E-08 |
| O994_RS02485 | EF0739 |  | 1.9 | nicotinamide riboside transporter                             | 4.50E-05 |
| O994_RS03025 | EF0859 |  | 1.7 | cation efflux family protein                                  | 7.40E-02 |
| O994_RS03085 | EF0872 |  | 2.9 | KUP system potassium uptake protein                           | 1.30E-22 |
| O994_RS03920 | EF1042 |  | 1.9 | multidrug efflux MFS transporter                              | 5.40E-05 |
| O994_RS04740 | EF1192 |  | 2.3 | MIP family channel protein                                    | 1.20E-08 |
| O994_RS13465 | EF1408 |  | 2.5 | ABC-2 type transport system ATP-binding protein               | 8.10E-08 |
| O994_RS06525 | EF1541 |  | 2.3 | riboflavin transporter                                        | 6.50E-08 |
| O994_RS07140 | EF1672 |  | 3.8 | putative ABC transport system permease protein                | 8.50E-24 |
| O994_RS07145 | EF1673 |  | 3.9 | putative ABC transport system ATP-binding protein             | 1.70E-32 |
| O994_RS07635 | EF1774 |  | 2.2 | QueT transporter family protein                               | 9.80E-06 |
| O994_RS13495 | EF1878 |  | 3.6 | ATP/GTP-binding protein                                       | 2.00E-07 |
| O994_RS08940 | EF2068 |  | 2.0 | multidrug efflux MFS transporter                              | 2.50E-07 |
| O994_RS09415 | EF2226 |  | 4.1 | ABC transporter ATP-binding protein/permease                  | 1.60E-32 |
| O994_RS09420 | EF2227 |  | 4.2 | ABC transporter ATP-binding protein/permease                  | 1.50E-27 |
| O994_RS10395 | EF2509 |  | 1.8 | AzIc family ABC transporter permease                          | 2.60E-03 |
| O994_RS10835 | EF2641 |  | 2.0 | glycine betaine/L-proline ABC transporter ATP-binding protein | 7.20E-03 |
| O994_RS10840 | EF2642 |  | 1.9 | glycine betaine/L-proline ABC transporter                     | 7.20E-03 |
| O994_RS10875 | EF2649 |  | 1.9 | spermidine/putrescine ABC transporter                         | 2.80E-05 |
| O994_RS10880 | EF2650 |  | 1.9 | spermidine/putrescine ABC transporter permease                | 9.80E-06 |
| O994_RS10885 | EF2651 |  | 1.9 | spermidine/putrescine ABC transporter permease                | 4.70E-05 |
| O994_RS10890 | EF2652 |  | 1.8 | spermidine/putrescine ABC transporter ATP-binding protein     | 1.10E-05 |



|              |        |               |      |                                                                  |          |
|--------------|--------|---------------|------|------------------------------------------------------------------|----------|
| O994_RS11015 | EF2680 |               | 1.6  | ABC transporter ATP-binding protein/permease                     | 3.70E-03 |
| O994_RS11430 | EF2768 |               | 2.7  | hypothetical protein                                             | 1.70E-06 |
| O994_RS11435 | EF2769 |               | 2.7  | energy-coupling factor transport system ATP-binding protein      | 8.80E-12 |
| O994_RS11440 | EF2770 |               | 2.7  | energy-coupling factor transport system permease protein         | 3.00E-11 |
| O994_RS11975 | EF2935 |               | 1.5  | xanthine/uracil permeases family protein                         | 5.10E-02 |
| O994_RS01460 | EF2985 |               | 4.1  | putative ABC transport system permease protein                   | 5.40E-37 |
| O994_RS01455 | EF2986 |               | 3.6  | putative ABC transport system ATP-binding protein                | 1.20E-18 |
| O994_RS01450 | EF2987 |               | 3.2  | HlyD family efflux transporter periplasmic adaptor subunit       | 1.00E-16 |
| O994_RS01090 | EF3053 | <i>thiT</i>   | 1.5  | thiamine transporter                                             | 7.80E-02 |
| O994_RS00640 | EF3152 | <i>mscL</i>   | 1.7  | large conductance mechanosensitive channel protein               | 2.90E-03 |
| O994_RS13840 | EF0063 |               | -2.0 | pheromone binding protein                                        | 3.70E-04 |
| O994_RS13740 | EF0082 |               | -2.8 | major facilitator family transporter                             | 1.60E-06 |
| O994_RS13695 | EF0094 |               | -3.3 | formate/nitrite transporter family protein                       | 3.10E-09 |
| O994_RS13375 | EF0176 |               | -1.9 | hypothetical protein                                             | 2.60E-03 |
| O994_RS13370 | EF0177 |               | -1.6 | hypothetical protein                                             | 1.60E-02 |
| O994_RS13365 | EF0178 |               | -2.3 | ABC transporter ATP-binding protein                              | 2.90E-10 |
| O994_RS13360 | EF0179 |               | -2.2 | ABC transporter permease                                         | 4.70E-08 |
| O994_RS13355 | EF0180 |               | -2.1 | ABC transporter permease                                         | 1.20E-06 |
| O994_RS12865 | EF0270 |               | -2.4 | PTS system $\beta$ -glucoside-specific transporter subunit IIABC | 7.40E-07 |
| O994_RS12490 | EF0402 | <i>nhaC-1</i> | -1.8 | Na <sup>+</sup> /H <sup>+</sup> antiporter                       | 2.00E-03 |
| O994_RS12450 | EF0411 |               | -4.7 | PTS system mannitol-specific transporter subunit IIBC            | 2.30E-14 |
| O994_RS12445 | EF0412 | <i>mltF</i>   | -4.9 | PTS system mannitol-specific transporter subunit IIA             | 1.60E-13 |
| O994_RS12085 | EF0516 |               | -1.9 | PTS sugar transporter subunit IIC                                | 9.70E-03 |
| O994_RS03250 | EF0907 |               | -1.6 | peptide ABC transporter peptide-binding protein                  | 5.90E-03 |
| O994_RS03405 | EF0938 | <i>ugpC</i>   | -2.2 | sugar ABC transporter ATP-binding protein                        | 2.60E-05 |
| O994_RS01715 | EF1018 |               | -3.0 | PTS system transporter subunit IIA                               | 7.40E-07 |
| O994_RS01720 | EF1160 | <i>celB</i>   | -2.4 | PTS system cellobiose-specific transporter subunit IIC           | 4.60E-04 |
| O994_RS04950 | EF1234 |               | -2.7 | ABC transporter substrate-binding protein                        | 3.60E-06 |
| O994_RS06985 | EF1639 | <i>btuC</i>   | -1.9 | cobalamin transport system ATP-binding protein                   | 7.70E-03 |
| O994_RS06990 | EF1641 |               | -2.3 | cobalamin transport system substrate-binding protein             | 1.50E-04 |

|              |        |              |      |                                                        |          |
|--------------|--------|--------------|------|--------------------------------------------------------|----------|
| O994_RS07370 | EF1720 |              | -2.1 | uracil permease                                        | 6.00E-03 |
| O994_RS09350 | EF2213 |              | -3.9 | PTS system transporter subunit IIBC                    | 5.60E-27 |
| O994_RS09390 | EF2221 |              | -2.8 | ABC transporter substrate-binding protein              | 1.20E-12 |
| O994_RS09395 | EF2222 |              | -2.3 | ABC transporter permease                               | 2.30E-06 |
| O994_RS09400 | EF2223 |              | -3.9 | putative aldouronate transport system permease protein | 2.50E-20 |
| O994_RS10080 | EF2442 | <i>PiT</i>   | -2.9 | inorganic phosphate transporter, PiT family            | 1.40E-11 |
| O994_RS10275 | EF2485 | <i>cpsK</i>  | -1.8 | ABC transporter permease                               | 1.20E-03 |
| O994_RS10280 | EF2486 | <i>cpsJ</i>  | -2.1 | ABC transporter ATP-binding protein                    | 1.70E-06 |
| O994_RS10865 | EF2647 | <i>griP</i>  | -2.3 | gluconate:H <sup>+</sup> symporter, GntP family        | 1.50E-03 |
| O994_RS11995 | EF2959 | <i>rbsU</i>  | -1.6 | ribose uptake protein                                  | 3.00E-02 |
| O994_RS12000 | EF2960 | <i>rbsD</i>  | -2.5 | D-ribose pyranase                                      | 3.80E-07 |
| O994_RS12020 | EF2964 | <i>ulaA</i>  | -4.1 | PTS system ascorbate-specific transporter subunit IIC  | 1.00E-16 |
| O994_RS12025 | EF2965 |              | -4.5 | hypothetical protein                                   | 9.60E-17 |
| O994_RS00870 | EF3108 | <i>opp2B</i> | -3.8 | oligopeptide ABC transporter permease                  | 1.10E-30 |
| O994_RS00710 | EF3137 |              | -2.7 | PTS system transporter subunit IIB                     | 1.20E-05 |
| O994_RS00705 | EF3138 |              | -2.8 | PTS system transporter subunit IID                     | 3.20E-07 |
| O994_RS00620 | EF3157 |              | -3.4 | glycosyl hydrolase                                     | 1.00E-22 |
| O994_RS00385 | EF3208 |              | -1.8 | ABC-2 type transport system permease protein           | 5.80E-02 |
| O994_RS00380 | EF3209 |              | -1.7 | ABC-2 type transport system permease protein           | 4.90E-02 |
| O994_RS00190 | EF3259 |              | -2.0 | Gx transporter family protein                          | 1.10E-04 |
| O994_RS14155 | EF3327 |              | -2.3 | citrate-Mg <sup>2+</sup> :H <sup>+</sup>               | 1.00E-05 |

#### **Metabolism of cofactors and vitamins**

|              |        |             |     |                                                  |          |
|--------------|--------|-------------|-----|--------------------------------------------------|----------|
| O994_RS08880 | EF2056 | <i>ubiA</i> | 1.4 | 1,4-dihydroxy-2-naphthoate octaprenyltransferase | 9.70E-02 |
| O994_RS11425 | EF2767 |             | 2.4 | transcriptional regulator                        | 1.50E-04 |

|              |        |             |      |                                      |          |
|--------------|--------|-------------|------|--------------------------------------|----------|
| O994_RS06970 | EF1637 | <i>eutT</i> | -2.5 | ATP:cob(I)alamin adenosyltransferase | 1.20E-04 |
|--------------|--------|-------------|------|--------------------------------------|----------|

#### **Metabolism of other amino acids**

|              |        |             |      |                                   |          |
|--------------|--------|-------------|------|-----------------------------------|----------|
| O994_RS05480 | EF1338 | <i>trxB</i> | 1.9  | thioredoxin-disulfide reductase   | 5.20E-08 |
| O994_RS03365 | EF0930 | <i>metG</i> | -1.6 | methionyl-tRNA synthetase         | 2.50E-02 |
| O994_RS07920 | EF1858 | <i>panD</i> | -1.6 | aspartate $\alpha$ -decarboxylase | 1.40E-02 |

|                                     |        |               |      |                                                               |          |
|-------------------------------------|--------|---------------|------|---------------------------------------------------------------|----------|
| O994_RS07925                        | EF1859 | <i>panC</i>   | -1.9 | pantoate-- $\beta$ -alanine ligase                            | 8.50E-06 |
| O994_RS11290                        | EF2738 |               | -2.0 | thioredoxin reductase/glutathione-like protein                | 1.10E-02 |
| <b><u>Nucleotide Metabolism</u></b> |        |               |      |                                                               |          |
| O994_RS13400                        | EF0171 | <i>adD</i>    | 2.9  | adenosine deaminase                                           | 7.40E-24 |
| O994_RS13150                        | EF0228 | <i>adk</i>    | -2.4 | adenylate kinase                                              | 7.00E-17 |
| O994_RS07335                        | EF1713 | <i>pyrF</i>   | -1.5 | orotidine 5'-phosphate decarboxylase                          | 2.70E-02 |
| O994_RS07360                        | EF1718 | <i>pyrC</i>   | -2.0 | dihydroorotase                                                | 5.70E-03 |
| O994_RS07365                        | EF1719 | <i>pyrB</i>   | -1.9 | aspartate carbamoyltransferase catalytic subunit              | 1.10E-02 |
| O994_RS07375                        | EF1721 | <i>pyrR</i>   | -2.5 | bifunctional pyrimidine regulatory protein                    | 2.10E-05 |
| O994_RS14325                        | EF3293 | <i>guaB</i>   | -1.7 | inosine 5'-monophosphate dehydrogenase                        | 6.10E-04 |
| <b><u>Other</u></b>                 |        |               |      |                                                               |          |
| O994_RS01430                        | EF0287 |               | 2.7  | elongation factor P                                           | 4.80E-06 |
| O994_RS02635                        | EF0771 | <i>clpP</i>   | 2.5  | ATP-dependent Clp endopeptidase proteolytic subunit           | 1.50E-13 |
| O994_RS03900                        | EF1038 |               | 3.1  | lipoprotein                                                   | 7.40E-12 |
| O994_RS06755                        | EF1590 |               | 2.9  | protease synthase and sporulation negative regulatory protein | 1.10E-07 |
| O994_RS07135                        | EF1671 |               | 2.2  | oxidoreductase, zinc-binding                                  | 6.90E-07 |
| O994_RS07205                        | EF1685 | <i>hlyIII</i> | 1.6  | hemolysin III                                                 | 2.60E-02 |
| O994_RS11160                        | EF2708 |               | 1.7  | GlsB/YeaQ/YmgE family stress response membrane protein        | 2.70E-04 |
| O994_RS13790                        | EF0071 |               | -2.1 | lipoprotein                                                   | 2.40E-05 |
| O994_RS13280                        | EF0200 | <i>fusA</i>   | -1.9 | elongation factor G                                           | 1.90E-04 |
| O994_RS12255                        | EF0452 |               | -2.5 | acyl-CoA synthetase                                           | 4.90E-05 |
| O994_RS02150                        | EF0678 |               | -1.8 | acetyltransferase                                             | 2.50E-02 |
| O994_RS03660                        | EF0990 | <i>ftsL</i>   | -1.8 | cell division protein                                         | 5.50E-03 |
| O994_RS04910                        | EF1226 |               | -2.7 | oxidoreductase                                                | 1.50E-05 |
| O994_RS04915                        | EF1227 |               | -2.4 | NADPH-dependent oxidoreductase                                | 3.20E-04 |
| O994_RS06510                        | EF1538 | <i>scpA</i>   | -1.6 | segregation and condensation protein A                        | 1.30E-02 |
| O994_RS06515                        | EF1539 | <i>scpB</i>   | -1.6 | Segregation and condensation protein B                        | 2.80E-03 |
| O994_RS06925                        | EF1625 |               | -1.9 | BMC domain-containing protein                                 | 4.90E-02 |
| O994_RS10300                        | EF2490 | <i>cpsF</i>   | -2.7 | casular polysaccharide biosynthesis protein                   | 2.00E-11 |

|              |        |            |      |                                                            |          |
|--------------|--------|------------|------|------------------------------------------------------------|----------|
| O994_RS10360 | EF2502 |            | -2.0 | cell cycle protein                                         | 9.10E-05 |
| O994_RS10610 | EF2590 |            | -2.1 | serine hydrolase: $\beta$ -lactamase transpeptidase family | 5.20E-05 |
| O994_RS00890 | EF3096 | <i>smc</i> | -2.0 | chromosome segregation protein SMC                         | 2.10E-04 |

### **Poorly Characterised**

|              |        |             |     |                                                  |           |
|--------------|--------|-------------|-----|--------------------------------------------------|-----------|
| O994_RS14010 | EF0025 |             | 2.0 | DUF308 domain-containing protein                 | 1.10E-06  |
| O994_RS14005 | EF0026 |             | 4.1 | hypothetical protein                             | 5.20E-43  |
| O994_RS12785 | EF0286 |             | 2.8 | fibronectin-binding protein                      | 5.50E-10  |
| O994_RS12415 | EF0419 |             | 2.6 | hypothetical protein                             | 8.00E-06  |
| O994_RS12170 | EF0468 |             | 1.8 | LemA family protein                              | 9.10E-03  |
| O994_RS12165 | EF0469 |             | 2.2 | hypothetical protein                             | 5.90E-05  |
| O994_RS01945 | EF0638 |             | 3.3 | DUF1307 domain-containing protein                | 1.50E-20  |
| O994_RS02125 | EF0673 |             | 3.6 | acyltransferase family protein                   | 9.90E-19  |
| O994_RS02445 | EF0730 |             | 2.6 | thioredoxin family protein                       | 1.70E-05  |
| O994_RS02525 | EF0747 |             | 2.0 | DUF1003 domain-containing protein                | 8.20E-06  |
| O994_RS02765 | EF0797 |             | 3.9 | DUF4097 family $\beta$ strand repeat protein     | 1.50E-28  |
| O994_RS02770 | EF0798 |             | 3.5 | DUF1700 domain-containing protein                | 1.90E-25  |
| O994_RS02820 | EF0819 |             | 1.7 | DUF960 domain-containing protein                 | 6.20E-02  |
| O994_RS03060 | EF0867 |             | 1.8 | VOC family protein                               | 7.40E-02  |
| O994_RS03370 | EF0931 |             | 3.0 | hypothetical protein                             | 1.50E-16  |
| O994_RS03375 | EF0932 |             | 5.2 | hypothetical protein                             | 1.80E-53  |
| O994_RS03845 | EF1027 | <i>mprF</i> | 1.9 | bifunctional lysylphosphatidylglycerol flippase  | 8.40E-05  |
| O994_RS03855 | EF1029 |             | 2.0 | hypothetical protein                             | 1.40E-03  |
| O994_RS03860 | EF1030 |             | 1.7 | endonuclease/exonuclease/phosphatase             | 3.40E-02  |
| O994_RS04130 | EF1064 |             | 1.8 | VOC family protein                               | 1.40E-03  |
| O994_RS04140 | EF1067 |             | 5.1 | hypothetical protein                             | 4.20E-105 |
| O994_RS04230 | EF1088 |             | 2.3 | DsbA family protein                              | 1.20E-04  |
| O994_RS04270 | EF1096 |             | 2.0 | DUF378 domain-containing protein                 | 8.90E-04  |
| O994_RS04290 | EF1099 |             | 2.6 | LPXTG cell wall anchor domain-containing protein | 1.50E-10  |
| O994_RS04305 | EF1102 |             | 4.3 | YxeA family protein                              | 4.00E-39  |
| O994_RS04680 | EF1180 |             | 1.9 | CsbD family protein                              | 9.90E-09  |
| O994_RS05850 | EF1412 |             | 3.8 | hypothetical protein                             | 3.70E-24  |

|              |        |             |     |                                                    |           |
|--------------|--------|-------------|-----|----------------------------------------------------|-----------|
| O994_RS06255 | EF1489 |             | 2.3 | hypothetical protein                               | 1.40E-05  |
| O994_RS06260 | EF1490 |             | 2.3 | hypothetical protein                               | 6.70E-07  |
| O994_RS06315 | EF1501 |             | 1.9 | hypothetical protein                               | 2.40E-05  |
| O994_RS06480 | EF1532 |             | 6.4 | hypothetical protein                               | 5.30E-126 |
| O994_RS06485 | EF1533 |             | 6.5 | hypothetical protein                               | 4.50E-119 |
| O994_RS06530 | EF1542 |             | 1.8 | hypothetical protein                               | 7.40E-04  |
| O994_RS06825 | EF1605 |             | 3.2 | hypothetical protein                               | 2.60E-11  |
| O994_RS06845 | EF1609 |             | 1.7 | DUF2179 domain-containing protein                  | 6.30E-02  |
| O994_RS07105 | EF1665 |             | 3.0 | conjugal transfer protein                          | 9.10E-13  |
| O994_RS07165 | EF1677 |             | 1.9 | hypothetical protein                               | 4.80E-03  |
| O994_RS07180 | EF1680 |             | 1.5 | YozE family protein                                | 7.40E-02  |
| O994_RS07530 | EF1751 |             | 3.6 | putative membrane protein                          | 6.30E-22  |
| O994_RS07535 | EF1752 |             | 3.7 | hypothetical protein                               | 3.20E-30  |
| O994_RS07540 | EF1753 | <i>liaX</i> | 3.7 | hypothetical protein                               | 1.60E-26  |
| O994_RS07705 | EF1789 |             | 1.7 | SPFH domain-containing protein                     | 9.20E-04  |
| O994_RS07730 | EF1794 |             | 1.9 | DUF2188 domain-containing protein                  | 5.10E-06  |
| O994_RS08145 | EF1903 |             | 3.3 | hypothetical protein                               | 4.70E-25  |
| O994_RS08275 | EF1933 |             | 2.5 | hypothetical protein                               | 1.20E-05  |
| O994_RS08325 | EF1946 |             | 1.9 | hypothetical protein                               | 5.90E-06  |
| O994_RS08330 | EF1947 |             | 1.9 | hypothetical protein                               | 3.10E-06  |
| O994_RS08490 | EF1980 |             | 1.9 | hypothetical protein                               | 7.00E-04  |
| O994_RS08935 | EF2067 |             | 2.2 | YbhB/YbcL family Raf kinase inhibitor-like protein | 5.10E-05  |
| O994_RS09295 | EF2202 |             | 2.2 | tspO protein                                       | 5.80E-04  |
| O994_RS09340 | EF2211 |             | 3.8 | yxmA family protein                                | 6.00E-28  |
| O994_RS10005 | EF2427 |             | 2.6 | hypothetical protein                               | 9.30E-22  |
| O994_RS10195 | EF2467 |             | 3.7 | hypothetical protein                               | 9.90E-26  |
| O994_RS10240 | EF2477 |             | 1.8 | SPFH domain-containing protein                     | 1.40E-02  |
| O994_RS10245 | EF2478 |             | 1.6 | hypothetical protein                               | 4.00E-02  |
| O994_RS10250 | EF2479 |             | 1.9 | TPM domain-containing protein                      | 3.70E-05  |
| O994_RS10265 | EF2483 |             | 1.5 | hypothetical protein                               | 4.30E-02  |
| O994_RS10410 | EF2547 |             | 2.1 | hypothetical protein                               | 7.40E-04  |

|              |        |             |      |                                                     |          |
|--------------|--------|-------------|------|-----------------------------------------------------|----------|
| O994_RS11075 | EF2692 |             | 1.6  | hypothetical protein                                | 4.70E-02 |
| O994_RS11100 | EF2697 |             | 3.6  | putative 5-bromo-4-chloroindoyl phosphate hydrolase | 4.20E-27 |
| O994_RS11315 | EF2743 |             | 1.7  | DUF975 family protein                               | 5.20E-04 |
| O994_RS11320 | EF2744 |             | 2.1  | M42 family metalloproteinase                        | 3.30E-09 |
| O994_RS11445 | EF2771 |             | 4.4  | traX family protein                                 | 5.40E-61 |
| O994_RS11850 | EF2909 |             | 1.7  | putative iron-sulfur cluster biosynthesis protein   | 2.00E-04 |
| O994_RS11945 | EF2929 |             | 1.4  | hypothetical protein                                | 9.30E-02 |
| O994_RS01260 | EF3018 |             | 3.7  | hypothetical protein                                | 1.90E-28 |
| O994_RS01245 | EF3021 | <i>gst</i>  | 1.9  | DinB family glutathione transferase                 | 2.10E-04 |
| O994_RS01095 | EF3052 |             | 2.1  | hypothetical protein                                | 2.70E-06 |
| O994_RS01070 | EF3057 |             | 2.8  | hypothetical protein                                | 6.70E-09 |
| O994_RS00545 | EF3174 |             | 1.9  | NAD(P)-dependent oxidoreductase                     | 5.30E-03 |
| O994_RS00265 | EF3239 |             | 3.5  | zinc ribbon domain-containing protein               | 4.60E-24 |
| O994_RS00120 | EF3273 |             | 1.9  | hypothetical protein                                | 1.30E-03 |
| O994_RS14220 | EF3314 |             | 1.8  | cell wall surface anchor protein                    | 5.80E-03 |
| O994_RS13050 | EF0248 |             | -1.6 | hypothetical protein                                | 4.90E-02 |
| O994_RS12870 | EF0269 |             | -2.9 | PRD domain-containing protein                       | 8.40E-08 |
| O994_RS14960 | EF0383 |             | -2.6 | acyl-CoA synthetase                                 | 5.60E-06 |
| O994_RS02605 | EF0764 |             | -2.3 | hypothetical protein                                | 7.50E-04 |
| O994_RS04615 | EF1166 |             | -1.6 | YitT family protein                                 | 3.00E-02 |
| O994_RS04650 | EF1173 |             | -2.2 | WecB/TagA/CpsF family glycosyltransferase           | 8.10E-06 |
| O994_RS04920 | EF1228 |             | -1.8 | helix-turn-helix domain-containing protein          | 4.40E-02 |
| O994_RS05465 | EF1327 |             | -2.6 | BadF/BadG/BcrA/BcrD ATPase                          | 1.20E-06 |
| O994_RS06440 | EF1523 |             | -2.0 | hypothetical protein                                | 9.70E-06 |
| O994_RS06910 | EF1622 |             | -2.2 | hypothetical protein                                | 3.70E-02 |
| O994_RS07245 | EF1693 |             | -2.2 | KH domain-containing protein                        | 2.40E-05 |
| O994_RS10075 | EF2441 |             | -2.7 | DUF47 family protein                                | 4.30E-08 |
| O994_RS10290 | EF2488 | <i>cpsH</i> | -2.8 | lipoprotein                                         | 1.90E-15 |
| O994_RS10305 | EF2491 |             | -2.9 | glycosyl transferase group 2 family protein         | 4.30E-19 |
| O994_RS10310 | EF2492 |             | -2.6 | glycosyltransferase family 2 protein                | 8.50E-08 |

|                                      |        |             |      |                                                                   |          |
|--------------------------------------|--------|-------------|------|-------------------------------------------------------------------|----------|
| O994_RS10515                         | EF2570 |             | -1.9 | aldehyde oxidoreductase                                           | 1.40E-02 |
| O994_RS00895                         | EF3095 |             | -1.7 | HAD superfamily hydrolase                                         | 7.30E-03 |
| O994_RS00195                         | EF3258 |             | -1.8 | NusG domain II-containing protein                                 | 1.60E-02 |
| O994_RS00185                         | EF3260 |             | -2.1 | heptaprenyl diphosphate synthase, component II                    | 4.70E-05 |
| O994_RS00090                         | EF3280 |             | -2.1 | U32 family peptidase                                              | 8.70E-05 |
| O994_RS14160                         | EF3326 |             | -4.7 | hypothetical protein                                              | 4.50E-13 |
| <b><u>Repair and Replication</u></b> |        |             |      |                                                                   |          |
| O994_RS02045                         | EF0659 |             | 2.0  | phage SPO1 DNA polymerase-like protein                            | 2.60E-03 |
| O994_RS04595                         | EF1162 |             | 2.2  | helicase                                                          | 2.30E-13 |
| O994_RS04535                         | EF1435 | <i>recU</i> | 1.8  | recombination protein U                                           | 1.50E-03 |
| O994_RS14095                         | EF0006 | <i>gyrA</i> | -1.8 | DNA gyrase subunit A                                              | 1.90E-03 |
| O994_RS07045                         | EF1653 | <i>rnhB</i> | -1.5 | ribonuclease HII                                                  | 9.70E-02 |
| <b><u>Signal Transduction</u></b>    |        |             |      |                                                                   |          |
| O994_RS13470                         | EF0373 |             | 2.3  | HAMP domain-containing histidine kinase                           | 8.10E-09 |
| O994_RS03350                         | EF0927 |             | 1.6  | sensor histidine kinase                                           | 6.00E-03 |
| O994_RS13475                         | EF1703 | <i>phoP</i> | 2.6  | alkaline phosphatase synthesis transcriptional regulatory protein | 2.90E-16 |
| O994_RS08850                         | EF2049 |             | 3.8  | ABC transporter permease                                          | 2.60E-30 |
| O994_RS08855                         | EF2050 |             | 3.7  | ABC transporter ATP-binding protein                               | 1.30E-28 |
| O994_RS11325                         | EF2746 | <i>dltD</i> | 2.9  | dltD protein                                                      | 2.30E-17 |
| O994_RS11330                         | EF2747 | <i>dltC</i> | 2.9  | D-alanine-poly(phosphoribitol) ligase subunit 2                   | 7.10E-21 |
| O994_RS11335                         | EF2748 | <i>dltB</i> | 3.1  | basic membrane protein                                            | 4.30E-26 |
| O994_RS11340                         | EF2749 | <i>dltA</i> | 3.1  | D-alanine-poly(phosphoribitol) ligase subunit 1                   | 6.10E-25 |
| O994_RS11860                         | EF2911 | <i>liaR</i> | 1.9  | LuxR family DNA-binding response regulator                        | 2.10E-05 |
| O994_RS11865                         | EF2912 | <i>liaS</i> | 1.7  | sensor histidine kinase                                           | 8.40E-03 |
| O994_RS11870                         | EF2913 | <i>liaF</i> | 2.0  | cell wall stress response regulator                               | 8.20E-05 |
| O994_RS06950                         | EF1632 |             | -1.8 | two-component system, sensor histidine kinase                     | 2.40E-03 |
| O994_RS14200                         | EF3318 | <i>citX</i> | -2.7 | 2-(5"-triphosphoribosyl)-3'-dephosphocoenzyme-A synthase          | 5.90E-07 |
| O994_RS14195                         | EF3319 | <i>citF</i> | -2.9 | citrate lyase subunit $\alpha$                                    | 8.40E-08 |
| O994_RS14190                         | EF3320 | <i>citE</i> | -3.0 | citrate lyase subunit $\beta$                                     | 3.40E-06 |

|                                         |        |             |      |                                                            |          |
|-----------------------------------------|--------|-------------|------|------------------------------------------------------------|----------|
| O994_RS14185                            | EF3321 | <i>citD</i> | -2.8 | citrate lyase subunit $\gamma$                             | 4.70E-05 |
| O994_RS14180                            | EF3322 | <i>citC</i> | -2.6 | [citrate(pro-3SO-lyase) ligase                             | 2.40E-06 |
| <b><u>Transcription</u></b>             |        |             |      |                                                            |          |
| O994_RS00290                            | EF3237 | <i>rpoC</i> | -1.8 | DNA-directed RNA polymerase subunit $\beta$                | 6.00E-03 |
| O994_RS00285                            | EF3238 | <i>rpoB</i> | -1.8 | DNA-directed RNA polymerase subunit $\beta$                | 3.70E-04 |
| <b><u>Transcriptional Regulator</u></b> |        |             |      |                                                            |          |
| O994_RS12395                            | EF0422 |             | 1.9  | IclR family transcriptional regulator                      | 4.40E-04 |
| O994_RS01975                            | EF0644 |             | 2.5  | LysR family transcriptional regulator                      | 2.60E-06 |
| O994_RS02390                            | EF0719 |             | 2.3  | DeoR family transcriptional regulator                      | 9.70E-06 |
| O994_RS03345                            | EF0926 |             | 1.7  | DNA-binding response regulator                             | 2.60E-03 |
| O994_RS03515                            | EF0962 |             | 1.6  | AraC family transcriptional regulator                      | 3.60E-02 |
| O994_RS14630                            | EF0966 |             | 1.9  | MerR family transcriptional regulator                      | 1.40E-03 |
| O994_RS07265                            | EF1699 |             | 2.2  | MerR family transcriptional regulator                      | 1.40E-05 |
| O994_RS10000                            | EF2426 |             | 1.5  | GntR family transcriptional regulator                      | 5.20E-02 |
| O994_RS10010                            | EF2428 |             | 2.6  | PadR family transcriptional regulator                      | 1.90E-20 |
| O994_RS10200                            | EF2469 |             | 3.5  | Cro/CI family transcriptional regulator                    | 1.60E-26 |
| O994_RS10820                            | EF2638 | <i>rex</i>  | 1.7  | redox-sensing transcriptional repressor                    | 8.60E-04 |
| O994_RS10895                            | EF2653 |             | 1.7  | Cro/CI family transcriptional regulator                    | 7.40E-05 |
| O994_RS01415                            | EF2995 |             | 1.7  | PucR family transcriptional regulator                      | 1.20E-02 |
| O994_RS01110                            | EF3049 |             | 2.2  | RpiR family phosphosugar-binding transcriptional regulator | 8.10E-08 |
| O994_RS00540                            | EF3175 |             | 1.6  | Rrf2 family transcriptional regulator                      | 4.70E-02 |
| O994_RS00275                            | EF3261 |             | 2.2  | AbrB family transcriptional regulator                      | 2.60E-09 |
| O994_RS00280                            | EF3262 |             | 2.2  | PemK family transcriptional regulator                      | 1.50E-08 |
| O994_RS00125                            | EF3272 |             | 1.8  | zinc-binding Cro/CI family transcriptional regulator       | 1.60E-03 |
| O994_RS13855                            | EF0058 | <i>purR</i> | -2.1 | purine operon repressor                                    | 7.30E-08 |
| O994_RS03210                            | EF0899 |             | -1.8 | post-transcriptional regulator                             | 8.90E-03 |
| O994_RS03835                            | EF1025 |             | -2.0 | catabolite repression regulator                            | 1.70E-03 |
| O994_RS03960                            | EF1050 |             | -1.8 | DNA-binding response regulator                             | 1.40E-03 |
| O994_RS06660                            | EF1569 | <i>psr</i>  | -1.7 | putative transcriptional regulator                         | 7.60E-03 |
| O994_RS06955                            | EF1633 |             | -2.0 | response regulator                                         | 1.20E-03 |



|              |        |  |      |                                            |          |
|--------------|--------|--|------|--------------------------------------------|----------|
| O994_RS11965 | EF2933 |  | -2.7 | redox-sensing transcriptional repressor    | 2.80E-08 |
| O994_RS12030 | EF2966 |  | -3.7 | BglG family transcriptional antiterminator | 1.00E-17 |

### **Translation**

|              |        |               |      |                           |          |
|--------------|--------|---------------|------|---------------------------|----------|
| O994_RS00390 | EF3207 |               | 1.5  | dihydrouridine synthase   | 8.80E-02 |
| O994_RS13665 | EF0100 | <i>serS-1</i> | -3.5 | seryl-tRNA synthetase     | 1.20E-12 |
| O994_RS13290 | EF0198 | <i>rpsL</i>   | -1.8 | 30S ribosomal protein S12 | 4.80E-05 |
| O994_RS13285 | EF0199 | <i>rpsG</i>   | -1.8 | 30S ribosomal protein S7  | 1.00E-05 |
| O994_RS13260 | EF0205 | <i>rpsJ</i>   | -1.5 | 30S ribosomal protein S10 | 5.20E-02 |
| O994_RS13255 | EF0206 | <i>rplC</i>   | -1.6 | 50S ribosomal protein L3  | 2.30E-02 |
| O994_RS13250 | EF0207 | <i>rplD</i>   | -1.8 | 50S ribosomal protein L4  | 4.30E-04 |
| O994_RS13240 | EF0209 | <i>rplB</i>   | -1.9 | 50S ribosomal protein L2  | 1.60E-03 |
| O994_RS13235 | EF0210 | <i>rpsS</i>   | -2.1 | 30S ribosomal protein S19 | 1.30E-04 |
| O994_RS13230 | EF0211 | <i>rplV</i>   | -2.0 | 50S ribosomal protein L22 | 1.10E-04 |
| O994_RS13225 | EF0212 | <i>rpsC</i>   | -1.9 | 30S ribosomal protein S3  | 2.50E-04 |
| O994_RS13220 | EF0213 | <i>rplP</i>   | -1.9 | 50S ribosomal protein L16 | 7.40E-04 |
| O994_RS13215 | EF0214 | <i>rpmC</i>   | -2.2 | 50S ribosomal protein L29 | 1.60E-06 |
| O994_RS13210 | EF0215 | <i>rpsQ</i>   | -2.0 | 30S ribosomal protein S3  | 1.70E-05 |
| O994_RS13205 | EF0216 | <i>rplN</i>   | -1.9 | 50S ribosomal protein L14 | 2.50E-04 |
| O994_RS13200 | EF0217 | <i>rplX</i>   | -2.0 | 50S ribosomal protein L24 | 1.60E-06 |
| O994_RS13195 | EF0218 | <i>rplE</i>   | -2.1 | 50S ribosomal protein L5  | 1.30E-08 |
| O994_RS13185 | EF0220 | <i>rpsH</i>   | -2.3 | 30S ribosomal protein S8  | 2.80E-11 |
| O994_RS13180 | EF0221 | <i>rplF</i>   | -2.3 | 50S ribosomal protein L6  | 3.00E-09 |
| O994_RS13175 | EF0223 | <i>rplR</i>   | -2.1 | 50S ribosomal protein L18 | 5.50E-05 |
| O994_RS13170 | EF0224 | <i>rpsE</i>   | -2.3 | 30S ribosomal protein S5  | 6.10E-11 |
| O994_RS13165 | EF0225 | <i>rpmD</i>   | -2.2 | 50S ribosomal protein L30 | 1.70E-10 |
| O994_RS13160 | EF0226 | <i>rplO</i>   | -2.3 | 50S ribosomal protein L15 | 1.60E-14 |
| O994_RS13140 | EF0230 | <i>rpmJ</i>   | -1.6 | 50S ribosomal protein L36 | 1.40E-03 |
| O994_RS13135 | EF0231 | <i>rpsM</i>   | -1.6 | 30S ribosomal protein S13 | 1.90E-03 |
| O994_RS13130 | EF0232 | <i>rpsK</i>   | -1.8 | 30S ribosomal protein S11 | 5.00E-04 |
| O994_RS01920 | EF0633 | <i>tryS-1</i> | -2.9 | tyrosyl-tRNA synthetase   | 3.60E-11 |

|              |        |             |      |                                                 |          |
|--------------|--------|-------------|------|-------------------------------------------------|----------|
| O994_RS02780 | EF0801 | <i>leuS</i> | -1.5 | leucyl-tRNA synthetase                          | 6.50E-02 |
| O994_RS03200 | EF0896 | <i>tgt</i>  | -1.6 | queuine tRNA-ribosyltransferase                 | 5.10E-02 |
| O994_RS03655 | EF0989 | <i>mraW</i> | -1.5 | 16S rRNA (cytosine1402-N4)-methyltransferase    | 6.20E-02 |
| O994_RS04365 | EF1115 | <i>pheS</i> | -1.9 | phenylalanine-tRNA ligase subunit $\alpha$      | 1.30E-06 |
| O994_RS05685 | EF1379 | <i>alaS</i> | -1.6 | alanyl-tRNA synthetase                          | 1.70E-03 |
| O994_RS07250 | EF1694 | <i>rpsP</i> | -2.0 | 30S ribosomal protein S16                       | 1.90E-04 |
| O994_RS08440 | EF1970 | <i>aspS</i> | -1.8 | aspartyl-tRNA synthetase                        | 1.80E-03 |
| O994_RS08445 | EF1971 | <i>hisS</i> | -2.1 | histidyl-tRNA synthetase                        | 3.70E-05 |
| O994_RS08845 | EF2048 | <i>rlmN</i> | -2.0 | 23S rRNA (adenine(2503)-C(2))-methyltransferase | 1.90E-03 |
| O994_RS09860 | EF2395 | <i>frr</i>  | -1.5 | ribosome recycling factor                       | 1.60E-02 |
| O994_RS09905 | EF2406 | <i>glyS</i> | -2.3 | glycyl-tRNA synthetase subunit $\beta$          | 7.60E-13 |
| O994_RS09910 | EF2407 | <i>glyQ</i> | -2.2 | glycyl-tRNA synthetase subunit $\alpha$         | 4.60E-06 |
| O994_RS11185 | EF2715 | <i>rplL</i> | -1.7 | 50S ribosomal protein L7/L12                    | 7.40E-05 |
| O994_RS11190 | EF2716 | <i>rplJ</i> | -1.7 | 50S ribosomal protein L10                       | 1.40E-03 |
| O994_RS11195 | EF2718 | <i>rplA</i> | -1.8 | 50S ribosomal protein L1                        | 5.90E-04 |
| O994_RS11200 | EF2719 | <i>rplK</i> | -1.5 | 50S ribosomal protein L11                       | 2.30E-02 |
| O994_RS11955 | EF2931 | <i>valS</i> | -1.5 | valyl-tRNA synthetase                           | 9.90E-02 |
| O994_RS00415 | EF3202 | <i>rpsN</i> | -2.2 | 30S ribosomal protein S14                       | 2.80E-10 |

#### **Unclassified: genetic information processing**

|              |        |             |      |                                        |          |
|--------------|--------|-------------|------|----------------------------------------|----------|
| O994_RS12145 | EF0473 | <i>nrdH</i> | 1.6  | ribonucleoside-diphosphate reductase 2 | 2.20E-03 |
| O994_RS02680 | EF0781 |             | 2.0  | cold-shock protein                     | 1.70E-05 |
| O994_RS08550 | EF1991 | <i>cspC</i> | 1.7  | cold shock protein                     | 9.30E-04 |
| O994_RS11000 | EF2677 | <i>mecA</i> | 1.9  | adaptor protein                        | 7.00E-08 |
| O994_RS07040 | EF1652 | <i>dprA</i> | -1.8 | DNA processing protein                 | 1.60E-02 |

#### **Unclassified: metabolism**

|              |        |               |     |                                        |          |
|--------------|--------|---------------|-----|----------------------------------------|----------|
| O994_RS00255 | EF0362 |               | 1.8 | chitin binding protein                 | 5.40E-04 |
| O994_RS02575 | EF0758 |               | 2.8 | cadmium-translocating P-type ATPase    | 2.90E-14 |
| O994_RS05105 | EF1268 |               | 1.6 | cation transporter E1-E2 family ATPase | 1.90E-03 |
| O994_RS05290 | EF1304 | <i>mgtA-2</i> | 2.2 | magnesium-translocating P-type ATPase  | 8.00E-04 |
| O994_RS05370 | EF1311 |               | 1.7 | hypothetical protein                   | 2.70E-02 |

|              |        |             |      |                                                     |          |
|--------------|--------|-------------|------|-----------------------------------------------------|----------|
| O994_RS05545 | EF1352 | <i>mgtA</i> | 2.4  | magnesium-translocating P-type ATPase               | 4.70E-21 |
| O994_RS05790 | EF1400 |             | 2.4  | cadmium-translocating P-type ATPase                 | 4.10E-10 |
| O994_RS07185 | EF1681 | <i>msrA</i> | 1.5  | peptide methionine sulfoxide reductase              | 1.90E-03 |
| O994_RS11800 | EF2899 |             | 2.0  | pyridine nucleotide-disulfide family oxidoreductase | 2.30E-03 |
| O994_RS00595 | EF3164 | <i>msrB</i> | 3.2  | methionine sulfoxide reductase B                    | 8.50E-18 |
| O994_RS03195 | EF0895 |             | -2.0 | glycerol dehydrogenase                              | 8.90E-03 |
| O994_RS03840 | EF1026 |             | -2.3 | hypothetical protein                                | 8.40E-05 |
| O994_RS04905 | EF1225 | <i>apbE</i> | -2.7 | thiamin biosynthesis                                | 9.70E-06 |
| O994_RS05530 | EF1348 |             | -2.1 | glucan 1                                            | 4.20E-04 |
| O994_RS06860 | EF1612 | <i>pflA</i> | -2.5 | pyruvate formate-lyase activating enzyme            | 6.30E-02 |
| O994_RS10315 | EF2493 |             | -2.0 | teichoic acid biosynthesis protein                  | 7.20E-03 |
| O994_RS10355 | EF2501 |             | -2.0 | arsenate reductase                                  | 3.70E-05 |
| O994_RS10655 | EF2601 |             | -1.9 | acyl carrier protein                                | 1.90E-04 |
| O994_RS11295 | EF2739 | <i>ahpC</i> | -2.6 | alkyl hydroperoxide reductase subunit C             | 8.10E-06 |
| O994_RS00695 | EF3140 |             | -3.4 | iron-containing alcohol dehydrogenase               | 1.30E-12 |
| O994_RS00210 | EF3255 |             | -1.7 | thiamin biosynthesis lipoprotein                    | 3.90E-02 |

### **Xenobiotics biodegradation and metabolism**

|              |        |  |      |            |          |
|--------------|--------|--|------|------------|----------|
| O994_RS10615 | EF2591 |  | -2.1 | glyoxalase | 9.50E-05 |
|--------------|--------|--|------|------------|----------|

### **JH2-2 Specific Genes**

|              |  |  |     |                                             |          |
|--------------|--|--|-----|---------------------------------------------|----------|
| O994_RS00820 |  |  | 1.9 | hypothetical protein                        | 9.70E-04 |
| O994_RS02090 |  |  | 2.1 | hypothetical protein                        | 2.40E-08 |
| O994_RS03080 |  |  | 3.5 | MazG-like family protein                    | 2.80E-08 |
| O994_RS03815 |  |  | 2.8 | hypothetical protein                        | 3.90E-09 |
| O994_RS03850 |  |  | 3.0 | hypothetical protein                        | 6.50E-25 |
| O994_RS04075 |  |  | 2.5 | hypothetical protein                        | 1.10E-11 |
| O994_RS04850 |  |  | 1.9 | hypothetical protein                        | 6.90E-04 |
| O994_RS05030 |  |  | 2.5 | ABC transporter permease                    | 3.80E-07 |
| O994_RS06250 |  |  | 1.9 | phospholipase                               | 9.20E-07 |
| O994_RS08720 |  |  | 2.7 | IS30-like element IS6770 family transposase | 5.00E-17 |
| O994_RS11130 |  |  | 1.6 | IS6 family transposase                      | 5.00E-02 |

|              |             |      |                                                        |          |
|--------------|-------------|------|--------------------------------------------------------|----------|
| O994_RS12845 |             | 2.5  | RusA family crossover junction endodeoxyribonuclease   | 1.00E-04 |
| O994_RS12900 |             | 1.5  | NAD(P)/FAD-dependent oxidoreductase                    | 4.40E-02 |
| O994_RS13445 |             | 1.7  | IS30-like element IS6770 family transposase            | 4.10E-04 |
| O994_RS13455 |             | 2.5  | hypothetical protein                                   | 1.50E-07 |
| O994_RS13460 |             | 2.7  | hypothetical protein                                   | 3.30E-12 |
| O994_RS13820 |             | 1.8  | IS30-like element IS6770 family transposase            | 3.90E-07 |
| O994_RS14445 |             | 2.6  | hypothetical protein                                   | 2.60E-06 |
| O994_RS14560 |             | 2.0  | ABC transporter permease                               | 3.80E-05 |
| O994_RS14575 |             | 1.8  | ABC transporter permease                               | 2.50E-02 |
| O994_RS14580 |             | 2.7  | $\alpha/\beta$ hydrolase                               | 5.10E-17 |
| O994_RS14655 |             | 2.1  | IS30-like element IS6770 family transposase            | 2.10E-09 |
| O994_RS14980 |             | 1.5  | helix-turn-helix domain-containing protein             | 7.80E-02 |
| O994_RS15025 |             | 4.1  | hypothetical protein                                   | 4.40E-45 |
| O994_RS00010 |             | -2.2 | hypothetical protein                                   | 2.60E-04 |
| O994_RS01555 |             | -2.3 | tRNA-Met                                               | 3.20E-04 |
| O994_RS01705 |             | -2.2 | tRNA-Ser                                               | 1.30E-03 |
| O994_RS02075 |             | -1.8 | DNA topoisomerase IV subunit A                         | 7.60E-04 |
| O994_RS03975 |             | -2.3 | hypothetical protein                                   | 2.70E-10 |
| O994_RS03985 |             | -2.1 | GW domain-containing glycosaminoglycan-binding protein | 7.00E-04 |
| O994_RS05795 |             | -2.2 | tRNA-Ile                                               | 9.20E-04 |
| O994_RS06725 |             | -1.9 | 23S ribosomal RNA                                      | 9.70E-04 |
| O994_RS06870 |             | -1.6 | DDE-type integrase/transposase/recombinase             | 4.50E-02 |
| O994_RS08725 | <i>lacC</i> | -3.2 | tagatose-6-phosphate kinase                            | 3.40E-14 |
| O994_RS08875 |             | -2.1 | 16S ribosomal RNA                                      | 2.60E-03 |
| O994_RS09165 |             | -2.7 | hypothetical protein                                   | 4.30E-06 |
| O994_RS12890 |             | -3.9 | hypothetical protein                                   | 3.90E-17 |
| O994_RS12895 |             | -3.5 | hypothetical protein                                   | 1.30E-12 |
| O994_RS13685 |             | -3.9 | hypothetical protein                                   | 2.80E-11 |
| O994_RS14525 |             | -1.9 | 23S ribosomal RNA                                      | 4.00E-03 |
| O994_RS14770 |             | -1.4 | hypothetical protein                                   | 7.60E-02 |

Table S5. The TXB-induced CroRS regulon in *E. faecalis* wild-type.<sup>†</sup>

| JH2-2 Locus Tag                                  | V583 Gene | Gene Name     | F/C (log <sub>2</sub> ) | Gene Function                                                            | P <sub>adj</sub> |
|--------------------------------------------------|-----------|---------------|-------------------------|--------------------------------------------------------------------------|------------------|
| <b><u>Amino acid Metabolism</u></b>              |           |               |                         |                                                                          |                  |
| O994_RS13945                                     | EF0037    | <i>proA</i>   | 2.5                     | $\gamma$ -glutamyl phosphate reductase                                   | 5.60E-17         |
| O994_RS03895                                     | EF1037    | <i>aspD</i>   | 2.3                     | aspartate aminotransferase                                               | 1.30E-13         |
| O994_RS04455                                     | EF1133    | <i>dapD</i>   | 4.3                     | 2,3,4,5-tetrahydropyridine-2,6-dicarboxylate <i>N</i> -acetyltransferase | 2.10E-115        |
| O994_RS04460                                     | EF1134    |               | 3.7                     | M20/M25/M40 family peptidase                                             | 6.30E-61         |
| O994_RS05390                                     | EF1314    | <i>alaT</i>   | 4.9                     | aminotransferase                                                         | 2.10E-115        |
| O994_RS09355                                     | EF2214    |               | 4.4                     | glyoxylase                                                               | 1.10E-55         |
| O994_RS10350                                     | EF2500    |               | 3.9                     | GcvH family protein                                                      | 1.40E-38         |
| O994_RS11210                                     | EF2721    | <i>sdhb-2</i> | 3.9                     | L-serine dehydratase, iron-sulfur-dependent subunit $\beta$              | 2.30E-44         |
| O994_RS11215                                     | EF2722    | <i>sdha-2</i> | 3.1                     | iron-sulfur-dependent L-serine dehydratase subunit $\alpha$              | 1.20E-19         |
| <b><u>Autolysis</u></b>                          |           |               |                         |                                                                          |                  |
| O994_RS13030                                     | EF0252    |               | 2.6                     | <i>N</i> -acetylmuramoyl-L-alanine amidase                               | 7.50E-17         |
| <b><u>Carbohydrate metabolism</u></b>            |           |               |                         |                                                                          |                  |
| O994_RS07000                                     | EF1644    | <i>lacX</i>   | 2.5                     | aldolase 1 epimerase                                                     | 6.40E-17         |
| O994_RS08160                                     | EF1907    |               | 1.8                     | enoyl-CoA hydratase                                                      | 6.50E-08         |
| O994_RS10030                                     | EF2432    |               | 1.8                     | metallo- $\beta$ -lactamase superfamily protein                          | 1.10E-06         |
| O994_RS06325                                     | EF1503    | <i>fbp</i>    | -1.5                    | fructose-1,6-bisphosphatase                                              | 9.60E-02         |
| <b><u>Cellular community</u></b>                 |           |               |                         |                                                                          |                  |
| O994_RS01150                                     | EF3041    |               | 2.2                     | pheromone binding protein                                                | 1.30E-08         |
| <b><u>Drug resistance: antimicrobial</u></b>     |           |               |                         |                                                                          |                  |
| O994_RS02970                                     | EF0849    | <i>alr</i>    | 2.6                     | alanine racemase                                                         | 1.30E-17         |
| O994_RS06490                                     | EF1534    |               | 3.4                     | cyclophilin type peptidyl-prolyl cis-trans isomerase                     | 2.40E-29         |
| <b><u>Folding, sorting and degradation</u></b>   |           |               |                         |                                                                          |                  |
| O994_RS07015                                     | EF1647    | <i>hslV</i>   | -2.6                    | ATP-dependent protease                                                   | 2.60E-15         |
| <b><u>Glycan biosynthesis and metabolism</u></b> |           |               |                         |                                                                          |                  |
| O994_RS02520                                     | EF0746    | <i>pbp(6)</i> | 5.4                     | penicillin binding protein                                               | 1.50E-77         |
| O994_RS03665                                     | EF0991    | <i>pbpC</i>   | 2.8                     | penicillin-binding protein C                                             | 2.00E-22         |
| O994_RS04525                                     | EF1148    | <i>pbp1A</i>  | 2.6                     | penicillin-binding protein 1A                                            | 2.60E-24         |

|              |        |              |     |                                               |          |
|--------------|--------|--------------|-----|-----------------------------------------------|----------|
| O994_RS05270 | EF1300 |              | 2.9 | putative lipid II flippase                    | 5.70E-10 |
| O994_RS06550 | EF1546 |              | 1.9 | LysM domain-containing protein                | 1.20E-08 |
| O994_RS07470 | EF1740 | <i>pbp1B</i> | 2.2 | penicillin-binding protein 1B                 | 2.00E-12 |
| O994_RS09150 | EF2170 | <i>epaX</i>  | 2.1 | glycosyl transferase group 2 family protein   | 7.30E-07 |
| O994_RS09155 | EF2171 | <i>epaW</i>  | 2.8 | dTDP-4-dehydro-6-deoxy-D-glucose              | 3.70E-21 |
| O994_RS09245 | EF2192 | <i>epaG</i>  | 2.2 | dTDP-glucose 4,6-dehydratase                  | 5.30E-13 |
| O994_RS09250 | EF2193 | <i>epaF</i>  | 2.7 | dTDP-4-dehydrorhamnose 3,5-epimerase          | 7.30E-27 |
| O994_RS09255 | EF2194 | <i>epaE</i>  | 2.6 | glucose-1-phosphate thymidyltransferase       | 4.00E-22 |
| O994_RS09260 | EF2195 | <i>epaD</i>  | 1.9 | glycosyl transferase group 2 family protein   | 4.50E-06 |
| O994_RS09265 | EF2196 | <i>epaC</i>  | 1.9 | glycosyl transferase group 2 family protein   | 7.50E-06 |
| O994_RS09270 | EF2197 | <i>epaB</i>  | 1.9 | glycosyl transferase group 2 family protein   | 2.40E-05 |
| O994_RS10585 | EF2585 | <i>murT</i>  | 3.3 | mur ligase                                    | 1.50E-56 |
| O994_RS10590 | EF2586 | <i>gatD</i>  | 3.0 | glutamine amidotransferase                    | 6.40E-34 |
| O994_RS11265 | EF2733 | <i>murB</i>  | 2.7 | UDP-N-acetylenolpyruvoylglucosamine reductase | 3.60E-19 |
| O994_RS11580 | EF2857 | <i>pbp2B</i> | 4.8 | penicillin-binding protein 2B                 | 3.00E-85 |
| O994_RS11595 | EF2860 | <i>pbp</i>   | 2.5 | putative peptidoglycan transpeptidase         | 1.10E-18 |
| O994_RS11880 | EF2915 | <i>mltG</i>  | 2.9 | mltG-like protein                             | 2.10E-32 |

### **Lipid metabolism**

|              |        |               |     |                                  |          |
|--------------|--------|---------------|-----|----------------------------------|----------|
| O994_RS12800 | EF0283 | <i>fabF-1</i> | 1.6 | 3-oxoacyl-ACP synthase           | 7.90E-03 |
| O994_RS05090 | EF1264 |               | 1.5 | lipoteichoic acid synthase       | 2.90E-03 |
| O994_RS07815 | EF1813 |               | 3.4 | lipoteichoic acid synthase       | 1.30E-15 |
| O994_RS10320 | EF2494 | <i>cdsA</i>   | 2.9 | phosphatidate cytidyltransferase | 1.50E-19 |
| O994_RS11690 | EF2880 | <i>fabF-2</i> | 1.5 | 3-oxoacyl-ACP synthase           | 1.60E-03 |
| O994_RS11695 | EF2881 | <i>fabG</i>   | 1.8 | 3-ketoacyl-ACP reductase         | 1.40E-08 |
| O994_RS11700 | EF2882 | <i>fabD</i>   | 1.4 | ACP S-malonyltransferase         | 1.30E-02 |

### **Membrane Transport**

|              |        |             |     |                                                      |          |
|--------------|--------|-------------|-----|------------------------------------------------------|----------|
| O994_RS13970 | EF0032 |             | 1.7 | putative copper transporter                          | 5.80E-05 |
| O994_RS04770 | EF1198 |             | 3.2 | ABC transporter permease                             | 2.60E-28 |
| O994_RS04775 | EF1199 |             | 3.2 | phosphate ABC transporter: substrate-binding protein | 1.10E-27 |
| O994_RS07580 | EF1761 | <i>ftsE</i> | 1.5 | cell division ATP-binding protein                    | 1.50E-02 |
| O994_RS07820 | EF1814 |             | 3.6 | drug resistance transporter EmrB/QacA family protein | 4.60E-13 |

|                                                        |        |             |      |                                                      |           |
|--------------------------------------------------------|--------|-------------|------|------------------------------------------------------|-----------|
| O994_RS07480                                           | EF2074 |             | 4.4  | ABC transporter ATP-binding protein                  | 5.30E-17  |
| O994_RS10825                                           | EF2639 |             | 1.6  | multidrug ABC transporter ATP-binding protein        | 4.60E-03  |
| O994_RS01540                                           | EF0420 |             | -1.6 | drug resistance transporter EmrB/QacA family protein | 5.50E-02  |
| O994_RS02705                                           | EF0785 |             | -1.7 | drug resistance transporter EmrB/QacA family protein | 1.30E-03  |
| O994_RS06380                                           | EF1516 |             | -2.2 | PTS system transporter subunit IIABC                 | 3.80E-05  |
| <b><u>Metabolism of cofactors and vitamins</u></b>     |        |             |      |                                                      |           |
| O994_RS03905                                           | EF1039 |             | 2.6  | HAD superfamily hydrolase                            | 6.40E-18  |
| O994_RS08535                                           | EF1989 | <i>hemH</i> | -1.9 | ferrochelatase                                       | 1.70E-03  |
| <b><u>Metabolism of terpenoids and polyketides</u></b> |        |             |      |                                                      |           |
| O994_RS03225                                           | EF0902 | <i>mvaK</i> | 2.9  | phosphomevalonate kinase                             | 1.30E-14  |
| O994_RS03230                                           | EF0903 | <i>mvaD</i> | 3.7  | diphosphomevalonate decarboxylase                    | 1.10E-22  |
| O994_RS05600                                           | EF1363 | <i>mvaS</i> | 4.4  | hydroxymethylglutaryl-CoA synthase                   | 7.80E-96  |
| O994_RS14705                                           | EF1364 | <i>mvaE</i> | 4.6  | acetyl-CoA acetyltransferase/HMG-CoA reductase       | 5.50E-93  |
| O994_RS10325                                           | EF2495 | <i>uppS</i> | 3.3  | UDP-diphosphate synthase                             | 3.60E-39  |
| O994_RS00245                                           | EF3245 | <i>uppP</i> | 5.2  | cell-envelope associated acid phosphatase            | 1.60E-102 |
| <b><u>Nucleotide metabolism</u></b>                    |        |             |      |                                                      |           |
| O994_RS06555                                           | EF1547 | <i>cmk</i>  | 2.1  | cytidylate kinase                                    | 3.00E-10  |
| O994_RS11360                                           | EF2754 | <i>nrdD</i> | 1.9  | anaerobic ribonucleoside triphosphate reductase      | 1.10E-04  |
| <b><u>Other</u></b>                                    |        |             |      |                                                      |           |
| O994_RS03660                                           | EF0990 | <i>ftsL</i> | 3.7  | cell division protein                                | 5.20E-39  |
| O994_RS05645                                           | EF1371 |             | 1.4  | metallo- $\beta$ -lactamase                          | 6.40E-02  |
| O994_RS06745                                           | EF1586 | <i>nox</i>  | 2.5  | NADH oxidase                                         | 6.60E-12  |
| O994_RS11270                                           | EF2734 |             | 3.8  | Gfo/Idh/MocA family oxidoreductase                   | 6.90E-58  |
| <b><u>Poorly characterised</u></b>                     |        |             |      |                                                      |           |
| O994_RS02340                                           | EF0708 |             | 3.5  | hypothetical protein                                 | 2.10E-32  |
| O994_RS02785                                           | EF0802 |             | 8.8  | DUF3955 domain-containing protein                    | 1.30E-110 |
| O994_RS02820                                           | EF0819 |             | 3.2  | DUF960 domain-containing protein                     | 1.30E-24  |
| O994_RS04450                                           | EF1132 |             | 4.9  | CBS-domain containing hypothetical protein           | 9.90E-76  |
| O994_RS04935                                           | EF1231 |             | 6.3  | metallophosphoesterase                               | 2.60E-107 |

|              |        |             |      |                                            |          |
|--------------|--------|-------------|------|--------------------------------------------|----------|
| O994_RS05020 | EF1249 | <i>efba</i> | 1.7  | fibronectin/fibrinogen-binding protein     | 2.30E-03 |
| O994_RS05060 | EF1258 |             | 4.7  | hypothetical protein                       | 1.80E-52 |
| O994_RS06420 | EF1518 |             | 5.1  | hypothetical protein                       | 5.30E-88 |
| O994_RS06580 | EF1553 |             | 1.9  | tetratricopeptide repeat protein           | 3.20E-06 |
| O994_RS08155 | EF1906 |             | 1.8  | hypothetical protein                       | 2.80E-08 |
| O994_RS09045 | EF2149 |             | 1.6  | hypothetical protein                       | 7.20E-04 |
| O994_RS09360 | EF2215 |             | 4.3  | hypothetical protein                       | 1.10E-52 |
| O994_RS09365 | EF2216 |             | 2.0  | FUSC family protein                        | 8.80E-04 |
| O994_RS09620 | EF2373 |             | 1.6  | hypothetical protein                       | 4.10E-03 |
| O994_RS10035 | EF2433 |             | 1.9  | phosphoglycerate mutase                    | 2.00E-06 |
| O994_RS10205 | EF2470 |             | 4.1  | putative metal-dependent phosphohydrolase  | 1.00E-54 |
| O994_RS10360 | EF2502 |             | 4.5  | cell cycle protein                         | 1.00E-58 |
| O994_RS11505 | EF2784 |             | 2.9  | DUF3042 domain containing protein          | 6.60E-16 |
| O994_RS11605 | EF2862 |             | 5.5  | hypothetical protein                       | 1.60E-76 |
| O994_RS11950 | EF2930 |             | 1.8  | hypothetical protein                       | 3.40E-03 |
| O994_RS00655 | EF3149 |             | 2.1  | helix-turn-helix domain-containing protein | 3.50E-10 |
| O994_RS00650 | EF3150 |             | 4.3  | M16 family peptidase                       | 2.30E-71 |
| O994_RS00645 | EF3151 |             | 4.2  | insulinase family protein                  | 1.60E-58 |
| O994_RS00520 | EF3179 |             | 1.6  | DUF3298 domain-containing protein          | 6.20E-02 |
| O994_RS00475 | EF3188 |             | 1.7  | hypothetical protein                       | 6.70E-04 |
| O994_RS14110 | EF0003 |             | -2.3 | RNA binding protein                        | 4.00E-12 |

---

### **Replication and repair**

|              |        |             |      |                                    |          |
|--------------|--------|-------------|------|------------------------------------|----------|
| O994_RS03575 | EF0972 |             | 4.6  | DNA repair exonuclease             | 5.40E-66 |
| O994_RS05275 | EF1301 |             | 2.7  | rod shape determining protein      | 1.50E-07 |
| O994_RS06750 | EF1587 | <i>mutT</i> | 4.4  | DNA mismatch repair protein        | 6.10E-48 |
| O994_RS07020 | EF1648 | <i>xerC</i> | 2.5  | integrase/recombinase              | 1.60E-14 |
| O994_RS14105 | EF0004 | <i>recF</i> | -1.7 | DNA replication and repair protein | 3.90E-04 |

---

### **Signal Transduction**

|              |        |             |     |                                |          |
|--------------|--------|-------------|-----|--------------------------------|----------|
| O994_RS05070 | EF1260 | <i>yclR</i> | 2.7 | DNA-binding response regulator | 4.70E-24 |
|--------------|--------|-------------|-----|--------------------------------|----------|



|                                          |        |             |      |                                                                      |          |
|------------------------------------------|--------|-------------|------|----------------------------------------------------------------------|----------|
| O994_RS05075                             | EF1261 | <i>yckK</i> | 2.8  | sensor histidine kinase                                              | 3.40E-23 |
| O994_RS07295                             | EF1705 |             | 2.7  | phosphate-binding protein                                            | 9.00E-21 |
| O994_RS01065                             | EF3058 |             | 4.4  | phosphotyrosine protein phosphatase                                  | 2.30E-71 |
| O994_RS08900                             | EF2060 | <i>cydB</i> | -1.6 | cytochrome D ubiquinol oxidase subunit II                            | 3.60E-04 |
| O994_RS08905                             | EF2061 | <i>cydA</i> | -1.8 | cytochrome D ubiquinol oxidase subunit I                             | 4.00E-07 |
| O994_RS09380                             | EF2219 | <i>yesM</i> | -2.6 | sensor histidine kinase                                              | 4.10E-13 |
| O994_RS14215                             | EF3315 | <i>citG</i> | -1.6 | triphosphoribosyl-dephospho-CoA synthase                             | 7.70E-03 |
| <b><u>Transcriptional regulators</u></b> |        |             |      |                                                                      |          |
| O994_RS12190                             | EF0465 |             | 2.0  | polyisoprenyl-teichoic acid--peptidoglycan teichoic acid transferase | 7.90E-09 |
| O994_RS02975                             | EF0850 |             | 2.1  | PemK family transcriptional regulator                                | 4.00E-06 |
| O994_RS03650                             | EF0988 | <i>mraZ</i> | 3.8  | division/cell wall cluster transcriptional repressor                 | 5.30E-36 |
| O994_RS04835                             | EF1212 |             | 4.5  | transcriptional regulator                                            | 2.90E-71 |
| O994_RS05280                             | EF1302 |             | 4.9  | transcriptional regulator                                            | 1.30E-40 |
| O994_RS05285                             | EF1303 |             | 5.6  | LysR family transcriptional regulator                                | 1.70E-53 |
| O994_RS06660                             | EF1569 | <i>psr</i>  | 3.5  | transcriptional regulator                                            | 7.90E-30 |
| O994_RS07005                             | EF1645 | <i>codY</i> | 2.8  | transcriptional repressor                                            | 9.10E-27 |
| O994_RS11140                             | EF2703 |             | 5.4  | LytR family transcriptional regulator                                | 7.80E-30 |
| O994_RS01385                             | EF3002 | <i>sylA</i> | 2.0  | transcriptional regulator                                            | 3.00E-04 |
| O994_RS01060                             | EF3059 |             | 4.7  | TetR family transcriptional regulator                                | 4.90E-60 |
| O994_RS06375                             | EF1515 |             | -2.2 | $\beta$ -glucoside operon transcriptional antiterminator             | 1.40E-03 |
| <b><u>Translation</u></b>                |        |             |      |                                                                      |          |
| O994_RS12980                             | EF0263 | <i>tilS</i> | 1.8  | tRNA(Ile)-lysidine synthase                                          | 4.00E-06 |
| O994_RS03465                             | EF0950 |             | 1.9  | tRNA threonylcarbamoyladenosine biosynthesis protein                 | 1.00E-03 |
| O994_RS03655                             | EF0989 | <i>rsmH</i> | 4.0  | 16S rRNA (cytosine(1402)-N(4))-methyltransferase                     | 2.60E-56 |
| <b><u>Unclassified metabolism</u></b>    |        |             |      |                                                                      |          |
| O994_RS05105                             | EF1268 |             | 2.5  | cation transporter E <sub>1</sub> -E <sub>2</sub> family ATPase      | 6.00E-23 |
| O994_RS09085                             | EF2157 | <i>dacA</i> | 3.5  | hypothetical protein                                                 | 9.70E-41 |
| O994_RS01390                             | EF3001 |             | 1.7  | protease synthase and sporulation negative regulatory protein        | 1.90E-02 |
| O994_RS14275                             | EF3303 |             | 4.0  | myosin-cross-reactive antigen                                        | 1.70E-54 |

**JH2-2 Specific**

|              |      |                                               |          |
|--------------|------|-----------------------------------------------|----------|
| O994_RS06245 | 2.1  | GNAT family <i>N</i> -acetyltransferase       | 7.10E-07 |
| O994_RS06415 | 5.0  | hypothetical protein                          | 2.10E-43 |
| O994_RS01545 | -1.5 | multicopper oxidase domain-containing protein | 2.40E-02 |
| O994_RS08540 | -2.0 | tRNA-Ile                                      | 6.20E-03 |

---

†Fold-change values are representative of differential gene expression between WT versus  $\Delta$ *croRS* in the presence of TXB.

**Table S6. A comparison of RNAseq and qRT-PCR differential gene expression in the *E. faecalis* WT and  $\Delta$ *croRS* strains in the presence and absence of TXB.<sup>†</sup>**

| Gene          | WT +/- TXB |         | $\Delta$ <i>croRS</i> +/- TXB |         | $\Delta$ <i>croRS</i> vs WT -TXB |         | WT vs $\Delta$ <i>croRS</i> +TXB |         |
|---------------|------------|---------|-------------------------------|---------|----------------------------------|---------|----------------------------------|---------|
|               | RNAseq     | qRT-PCR | RNAseq                        | qRT-PCR | RNAseq                           | qRT-PCR | RNAseq                           | qRT-PCR |
| <i>mvaD</i>   | 2.7        | 4.9     | <1                            | -0.4    | <1                               | 1.9     | 3.7                              | 1.7     |
| <i>mvaE</i>   | 4          | 5.1     | <1                            | -1.3    | <1                               | 0.3     | 4.6                              | 6.1     |
| <b>EF1518</b> | 8.3        | 8.4     | <1                            | 2       | <1                               | 0.9     | 5.1                              | 5.5     |
| <i>murT</i>   | 4.9        | 5       | <1                            | 0.8     | <1                               | 0.6     | 3.3                              | 3.6     |
| <b>EF2915</b> | 3.1        | 3.4     | <1                            | -0.2    | <1                               | 0.5     | 2.9                              | 3.1     |
| <i>liaR</i>   | 3.6        | 3.9     | 1.9                           | 0.5     | <1                               | 2.5     | <1                               | 0.9     |
| <i>liaS</i>   | 4          | 5.1     | 1.7                           | 0.4     | <1                               | 2       | <1                               | 2.6     |
| <i>liaF</i>   | 3.9        | 4.5     | 2                             | 1.4     | <1                               | 2.7     | <1                               | 3.7     |
| <i>liaX</i>   | 5.5        | 5.4     | 3.7                           | 3.4     | <1                               | 0.9     | <1                               | 1.1     |
| <b>EF0927</b> | <1         | 1.2     | 1.6                           | 1.3     | <1                               | 0.03    | <1                               | -0.1    |
| <b>EF2050</b> | 6.3        | 6.9     | 3.7                           | 3.2     | 2.6                              | 3.5     | <1                               | 0.2     |

<sup>†</sup>Genes differentially expressed below the threshold cutoff of +/- 1-fold log<sub>2</sub> have been designated <1 in the RNAseq data presented.

Table S7. Bacterial strains, plasmids and primers used in this study.

| Bacterial strain                                         | Description                                                                                                                            | Reference/Source     |
|----------------------------------------------------------|----------------------------------------------------------------------------------------------------------------------------------------|----------------------|
| <i>E. faecalis</i> JH2-2                                 | Laboratory strain, plasmid free Rif <sup>R</sup> , Fsc <sup>R</sup>                                                                    | [Jacob et al 1975]   |
| <i>E. faecalis</i> $\Delta$ <i>croRS</i>                 | JH2-2 strain harbouring an unmarked deletion of <i>croRS</i> (EF3290-89)                                                               | [Comenge et al 2003] |
| <i>E. faecalis</i> JH2-2 + pTCVlac_PliaX                 | JH2-2 strain harbouring pTCVlac_PliaX                                                                                                  | This study           |
| <i>E. faecalis</i> $\Delta$ <i>croRS</i> + pTCVlac_PliaX | $\Delta$ <i>croRS</i> strain harbouring pTCVlac_PliaX                                                                                  | This study           |
| <i>E. faecalis</i> 4BS + pTCVlac_PliaX                   | 4BS mutant strain harbouring pTCVlac_PliaX                                                                                             | This study           |
| Plasmid                                                  |                                                                                                                                        |                      |
| pIMAYZ_EF2057                                            | pIMAYZ + EF2057 knockout construct                                                                                                     | This study           |
| pTCVlac_PliaX                                            | pTCVlac + PliaX_ <i>lacZ</i> reporter construct                                                                                        |                      |
| Primers                                                  |                                                                                                                                        |                      |
| EF2057_AF                                                | Forward primer, upstream flank to generate the pIMAYZ_EF2057 knockout plasmid<br>CCTCACTAAAGGGAAACAAAAGCTGGGTACCCACCACAAACCTATGGCAAA   | This study           |
| EF2057_BR                                                | Reverse primer, upstream flank to generate the pIMAYZ_EF2057 knockout plasmid<br>GTAAAGAACGTTCAACGTCAGGA                               | This study           |
| EF2057_CD                                                | Forward primer, downstream flank to generate the pIMAYZ_EF2057 knockout plasmid<br>GTTCTTTAACGATATTCAACAATTGCCTGATGGCA                 | This study           |
| EF2057_DR                                                | Reverse primer, downstream flank to generate the pIMAYZ_EF2057 knockout plasmid<br>CGACTCACTATAGGGCGAATTGGAGCTCCGTCGTTTTAATGAGCTTCCTGA | This study           |
| PliaX_F                                                  | Forward primer, <i>liaX</i> promoter to generate the pTCVlac_PliaX reporter construct<br>AATTTGAATTCGGATGATCGTACTAATG                  | This study           |
| PliaX_R                                                  | Reverse primer, <i>liaX</i> promoter to generate the pTCVlac_PliaX reporter construct<br>AATTTGGATCCCTTTCATGGATATTGC                   | This study           |
| EF0903_qPCR_L                                            | Left primer, qPCR of EF0903<br>AGG CAG TTT ACA AGC GAT GG                                                                              | This study           |
| EF0903_qPCR_R                                            | Right primer, qPCR of EF0903<br>AAT TCA ATT CCG GGA CCA GC                                                                             | This study           |
| EF1364_qPCR_L                                            | Left primer, qPCR of EF1364                                                                                                            | This study           |

|               |                                                                              |            |
|---------------|------------------------------------------------------------------------------|------------|
| EF1364_qPCR_R | ACGGATGCCTTTAGTGGTCA<br>Right primer, qPCR of EF1364<br>TCTCCACAAGCGTTCCTGAT | This study |
| EF1518_qPCR_L | Left primer, qPCR of EF1518<br>GCTGGTCTTGGCTATCTTGG                          | This study |
| EF1518_qPCR_R | Right primer, qPCR of EF1518<br>GACCCCATGTGCGATACTTT                         | This study |
| EF2585_qPCR_L | Left primer, qPCR of EF2585<br>ACGCCAAGAATTTGATGAGG                          | This study |
| EF2585_qPCR_R | Right primer, qPCR of EF2585<br>GGTCGCGGAAAATATTCGTA                         | This study |
| EF2915_qPCR_L | Left primer, qPCR of EF2915<br>GCGGTCTGCTTCTTTGACTC                          | This study |
| EF2915_qPCR_R | Right primer, qPCR of EF2915<br>TGCAACTGCAGAAGGTGTTC                         | This study |
| EF2911_qPCR_L | Left primer, qPCR of EF2911<br>TCGTAGGCGAAGCAGAAAAT                          | This study |
| EF2911_qPCR_R | Right primer, qPCR of EF2911<br>CAATCGCCGGATACACTTTT                         | This study |
| EF2912_qPCR_L | Left primer, qPCR of EF2912<br>AATGGATGGGCAAACAAAAG                          | This study |
| EF2912_qPCR_R | Right primer, qPCR of EF2912<br>CTGATAGGACGCAAGTGCAA                         | This study |
| EF2913_qPCR_L | Left primer, qPCR of EF2913<br>TGCTCGCTCAGCTATATCCA                          | This study |
| EF2913_qPCR_R | Right primer, qPCR of EF2913<br>GGCGTTTTACTTGTGGCCTA                         | This study |
| EF1753_qPCR_L | Left primer, qPCR of EF1753<br>GCAAATGGTACCGTGGTTTT                          | This study |
| EF1753_qPCR_R | Right primer, qPCR of EF1753<br>CTGCTTTCACCCGTTTGTTT                         | This study |

|               |                                                       |            |
|---------------|-------------------------------------------------------|------------|
| EF0927_qPCR_L | Left primer, qPCR of EF0927<br>TTTTAACCGACCGAAAATGG   | This study |
| EF0927_qPCR_R | Right primer, qPCR of EF0927<br>AATGCGTCGTTGATCTTGTTG | This study |
| EF2050_qPCR_L | Left primer, qPCR of EF2050<br>AAGGATGTGATGGGCTTGTT   | This study |
| EF2050_qPCR_R | Right primer, qPCR of EF2050<br>TGGTTGCCGTTTTGGATAAT  | This study |

---

### References

- Comenge, Y. *et al.* (2003) The CroRS two-component regulatory system is required for intrinsic  $\beta$ -lactam resistance in *Enterococcus faecalis*. *J Bacteriol* 185(24), pp. 7184–92. doi: 10.1128/JB.185.24.7184-7192.2003.
- Jacob, A. E., Douglas, G. J. and Hobbs, S. J. (1975) Self transferable plasmids determining the hemolysin and bacteriocin of *Streptococcus faecalis* var. zymogenes. *J Bacteriol* 121(3), pp. 863–872.

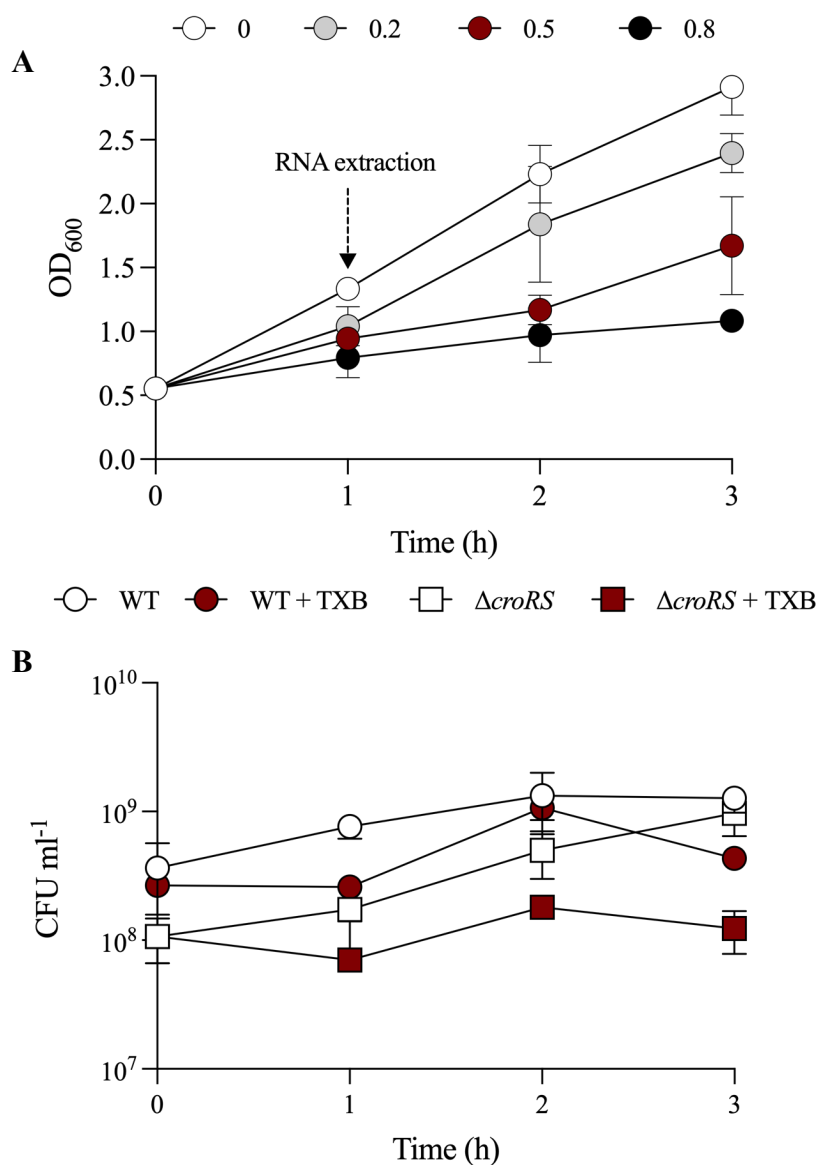

**Figure S1. Optimisation of teixobactin concentration for RNA sequencing.** *E. faecalis* wild type and  $\Delta croRS$  were grown to mid-exponential phase in BHI broth and challenged with TXB at concentrations of 0, 0.2, 0.5, or 0.8  $\mu\text{g ml}^{-1}$  for 3 h. Growth was measured by OD<sub>600</sub> at each concentration 1, 2, and 3 h post-challenge for *E. faecalis*  $\Delta croRS$  (A) and CFU ml<sup>-1</sup> for both wild-type and  $\Delta croRS$  at 0.5  $\mu\text{g ml}^{-1}$  (B). Following optimisation, RNA was extracted from cultures challenged with and without 0.5  $\mu\text{g ml}^{-1}$  of TXB at 1 h post-challenge. Data is representative of the mean of biological triplicates  $\pm$  SD.

**1. Determination of the four gene expression profiles**

Wild-type  $\pm$  TXB treatment

Wild-type versus  $\Delta croRS$   
+ TXB treatment

Wild-type versus  $\Delta croRS$   
- TXB treatment

$\Delta croRS \pm$  TXB treatment

**2. Filter for genes differentially expressed in the wild-type  $\pm$  TXB treatment**

Wild-type  $\pm$  TXB treatment

**3. Filter for genes differentially expressed in the wild-type versus  $\Delta croRS$  + TXB treatment**

Wild-type versus  $\Delta croRS$  + TXB treatment

**4. Filter for genes that are not differentially expressed in the wild-type versus  $\Delta croRS$  - TXB treatment**

Wild-type versus  $\Delta croRS$  - TXB treatment

**5. Filter for genes that are not differentially expressed in the  $\Delta croRS \pm$  TXB treatment**

$\Delta croRS \pm$  TXB treatment

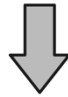

**TXB-induced CroRS regulon**

**Figure S2. Determining the TXB-induced CroRS regulon.** To determine the teixobactin (TXB)-induced CroRS regulon we first determined the four gene expression profiles. Each profile was subsequently filtered using the criteria listed above (Steps 2 – 5) to reach a final set of genes which represented the TXB-induced CroRS regulon.



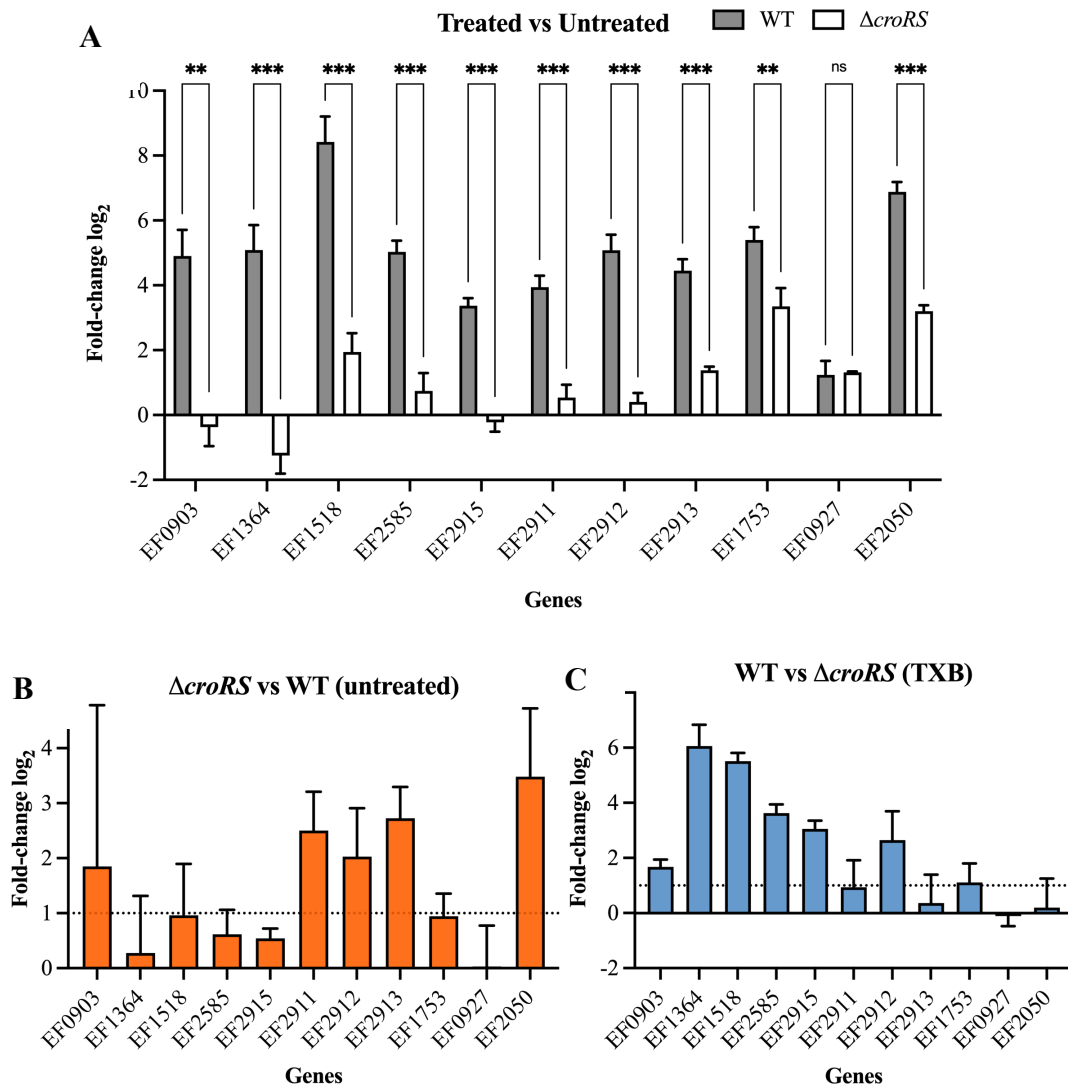

**Figure S3. Differential gene expression in the *E. faecalis* WT and  $\Delta$ *croRS* in the presence and absence of teixobactin.** qRT-PCR was carried out for 11 genes using *E. faecalis* WT and  $\Delta$ *croRS* cDNA to validate changes in gene expression observed during RNA sequencing analyses. Differential gene expression was determined for both *E. faecalis* WT and  $\Delta$ *croRS* in the presence versus absence of teixobactin (TXB) (A),  $\Delta$ *croRS* versus WT (untreated) (B), and WT versus  $\Delta$ *croRS* (treated) (C). Fold-change is represented as the ratio of the mean  $C_T$  value normalized to the  $C_T$  value for the constitutively expressed EF0013. Results are the mean of biological triplicate  $\pm$  SD. Statistical significance was determined using multiple unpaired t-tests.

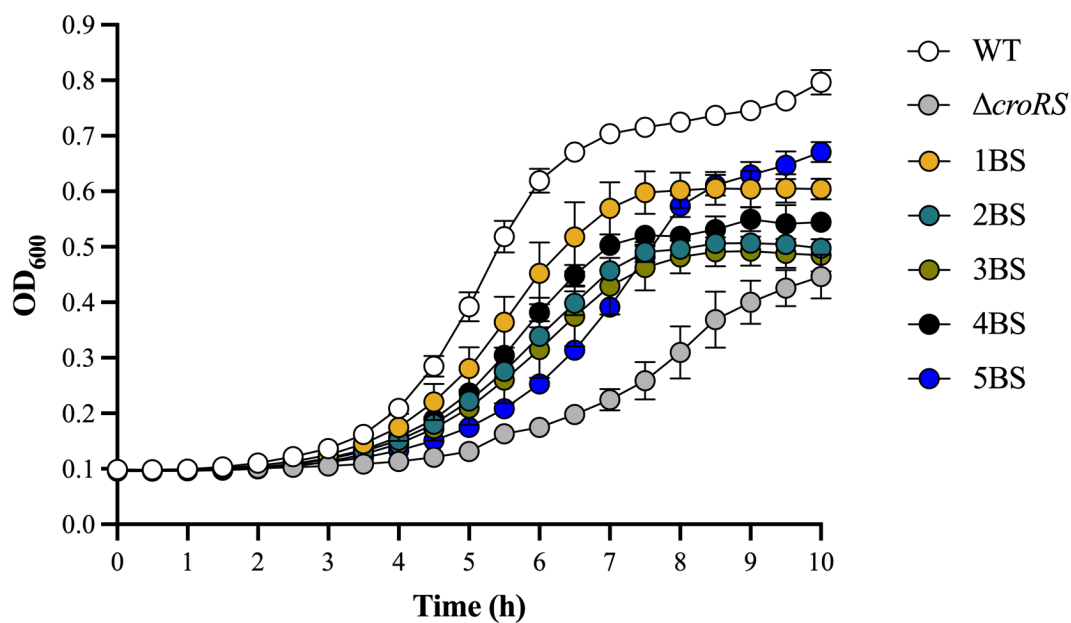

**Figure S4. Growth curve of the evolved  $\Delta croRS$  mutants 1BS – 5BS alongside the isogenic  $\Delta croRS$  mutant and WT (JH2-2).** Overnight cultures of *E. faecalis* JH2-2,  $\Delta croRS$ , and  $\Delta croRS$ -1BS to 5BS were diluted in fresh BHI and inoculated to an OD<sub>600</sub> of 0.01 in 96-well plates. Cells were incubated at 37°C with no aeration and growth was monitored as optical density (OD<sub>600</sub>) with readings taken every 30 min for 10 h. Results are presented in biological triplicate  $\pm$  SD.

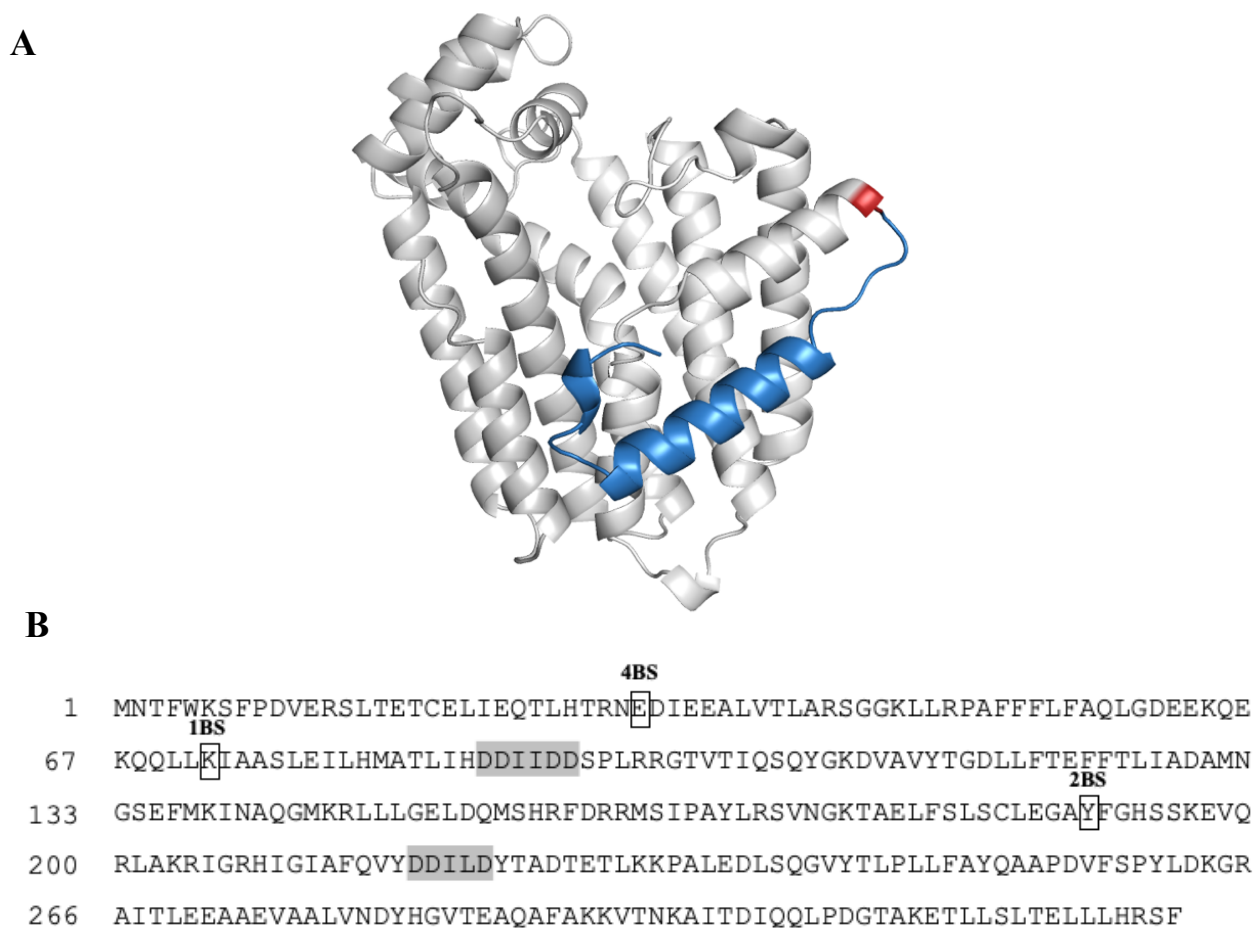

**Figure S5. A 3D model and amino acid sequence comparison of the putative heptaprenyl diphosphate synthase identifying mutations in the gain of tolerance  $\Delta$ *croRS* mutants.** (A) A 3D model of the truncated 4BS heptaprenyl diphosphate synthase protein. Red indicates the location of the E31\* mutation with blue representing the resulting truncated protein expressed in the 4BS mutant. (B) Two aspartate-rich motifs (DDXXD) are essential and highly conserved among (E)-prenyl diphosphate synthases (grey). The relative positions of the mutations found within the strains van1, 1BS, 2BS and 4BS are indicated and the amino acid containing the mutation is box. Mutants 2BS and 4BS result in a truncation of the protein at positions Y189 and E31 respectively, due to the introduction of a STOP codon, while in the 1BS mutant, a deletion of 9 bp (216\_225) results in a frameshift at K72.

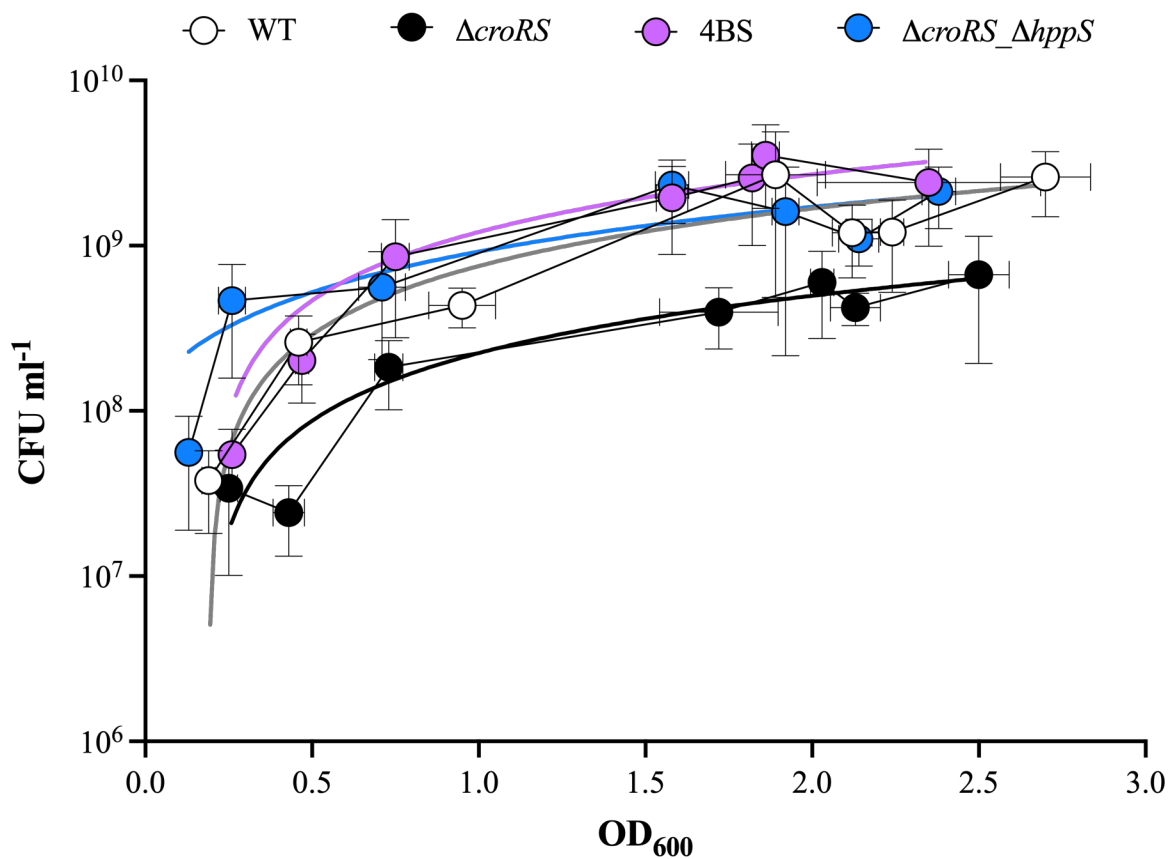

**Figure S6. Growth curve of the *E. faecalis* wild-type,  $\Delta croRS$ , 4BS and  $\Delta croRS_{\Delta hpps}$  strains.** *E. faecalis* strains were normalised to a starting OD<sub>600</sub> of 0.05 and grown in BHI broth at 37°C with no agitation for 24 h. Growth was measured as both optical density (OD<sub>600</sub>) and colony forming units per ml (CFU ml<sup>-1</sup>) every hour for 7 h to reach stationary phase. Results were plotted as OD<sub>600</sub> against CFU ml<sup>-1</sup> to observe growth as a ratio over time. Data was analysed for a line of best fit using a simple linear regression model.
